# Supplementary material for: Interplay between Cultured Human Osteoblastic and Skeletal Muscle Cells: Effects of Conditioned Media on Glucose and Fatty Acid Metabolism
Source: MDPI journal article supplement (doi:10.3390/biomedicines11112908), 2023-10-27
Supplement: s1 [file Suppl.Table_S1_Secretome_OB-CM.xlsx]

## Sheet: Sheet1
	Protein IDs	Protein symbol	Protein names	Sample 1	Sample 2	Sample 3	Sample 4	Intensity mean	Average gjeldende	Intensity mean
1	P06733	ENO1	Alpha-enolase	54074000	4955900	124840000	2441100	46577750	46577750	46577750
2	P62937	PPIA	Peptidyl-prolyl cis-trans isomerase A	57704000	146890	65483000	-	3.08335e+07	4.11113e+07	4.11113e+07		Kan ta bort
3	P63261	ACTG1	Actin, cytoplasmic 2	54740000	38379000	1764800	59994000	38719450	38719450	38719450
4	P08670	VIM	Vimentin	15887000	18158000	77678000	10058000	30445250	30445250	30445250
5	P09486	SPARC	SPARC	250970	24618000	40617000	19839000	2.13312e+07	2.13312e+07	2.13312e+07
6	P02765	AHSG	Alpha 2-HS Glycoprotein	183070	8453500	64151000	1865000	1.86631e+07	1.86631e+07	1.86631e+07
7	P23528	CFL1	Cofilin-1	16898000	6978700	45140000	3752300	18192250	18192250	18192250
8	P09382	LGALS1	Galectin-1	18001000	77073	52865000	1217200	1.80401e+07	1.80401e+07	1.80401e+07
9	P14618	PKM	Pyruvate kinase PKM	21187000	19120000	22570000	8431200	17827050	17827050	17827050
10	P37802	TAGLN2	Transgelin-2	9590100	4176600	41792000	2954900	14628400	14628400	14628400
11	P68363	TUBA1B	Tubulin alpha-1B chain	16309000	10683000	16650000	7833000	12868750	12868750	12868750
12	O00299	CLIC1	Chloride intracellular channel protein 1	7007100	7550500	31008000	4222100	12446925	12446925	12446925
13	P26022	PTX3	Pentraxin-related protein PTX3	7418500	7313700	27645000	6156900	12133525	12133525	12133525
14	P04792	HSPB1	Heat shock protein beta-1	4598400	4474900	33407000	2258700	11184750	11184750	11184750
15	P60709	ACTB	Actin, cytoplasmic 1	-	5899600	139650	25844000	7.97081e+06	10627750	10627750
16	P00338	LDHA	L-lactate dehydrogenase A chain	20868000	3368200	14000000	4067400	10575900	10575900	10575900
17	P09211	GSTP1	Glutathione S-transferase P	6913500	2582500	22367000	4649800	9128200	9128200	9128200
18	P07437	TUBB	Tubulin beta chain	1297400	10441000	15052000	7842600	8658250	8658250	8658250
19	P07737	PFN1	Profilin-1	23934000	1336500	5191000	448840	7727585	7727585	7727585
20	P07355	ANXA2	Annexin A2	13803000	1166400	13786000	2129300	7721175	7721175	7721175
21	P12814	ACTN1	Alpha-actinin-1	13736000	13903	15043000	8483.6	7.20035e+06	7.20035e+06	7.20035e+06
22	Q12841	FSTL1	Follistatin-related protein 1	11451000	12172	15895000	1175900	7133518	7133518	7133518
23	P04406	GAPDH	Glyceraldehyde-3-phosphate dehydrogenase	8918200	3661000	10369000	3219400	6541900	6541900	6541900
24	P10599	TXN	Thioredoxin	2720500	4800500	11004000	-	4631250	6175000	6175000
25	P63104	YWHAZ	14-3-3 protein zeta/delta	7246300	3422000	12330000	1692600	6172725	6172725	6172725
26	P18669	PGAM1	Phosphoglycerate mutase 1	2310700	223230	15093000	-	4.40673e+06	5.87564e+06	5.87564e+06
27	P02070	HBB	Hemoglobin subunit beta	5389600	5813700	11868000	331420	5850680	5850680	5850680
28	P27348	YWHAQ	14-3-3 protein theta	1095200	-	15576000	348420	4254905	5.67321e+06	5.67321e+06
29	P04083	ANXA1	Annexin A1	3784500	2961200	13358000	437550	5.13531e+06	5.13531e+06	5.13531e+06
30	Q15063	POSTN	Periostin	8792500	1832800	8710700	667680	5000920	5000920	5000920
31	P67936	TPM4	Tropomyosin alpha-4 chain	2253600	328650	1152300	15511000	4.81139e+06	4.81139e+06	4.81139e+06
32	P62857	RPS28	40S ribosomal protein S28	11462000	-	2690300	96431	3.56218e+06	4749577	4749577
33	P50395	GDI2	Rab GDP dissociation inhibitor beta	7148300	46548	6796000	-	3497712	4663616	4663616
34	P00558	PGK1	Phosphoglycerate kinase 1	4628800	177970	8865700	-	3.41812e+06	4557490	4557490
35	P52943	CRIP2	Cysteine-rich protein 2	5275100	3435800	8186800	1257800	4538875	4538875	4538875
36	P02452	COL1A1	Collagen alpha-1(I) chain	1041400	329950	14533000	463940	4.09207e+06	4.09207e+06	4.09207e+06
37	P13639	EEF2	Elongation factor 2	7167400	176000	8339600	492330	4.04383e+06	4.04383e+06	4.04383e+06
38	Q14847	LASP1	LIM and SH3 domain protein 1	3062900	6314900	3299800	3392100	4017425	4017425	4017425
39	P60174	TPI1	Triosephosphate isomerase	2376600	9555.1	9589800	-	2.99399e+06	3.99199e+06	3.99199e+06
40	P11142	HSPA8	Heat shock cognate 71 kDa protein	4911600	1502100	9329200	136090	3.96975e+06	3.96975e+06	3.96975e+06
41	P21810	BGN	Biglycan	9618300	1105800	4631600	413250	3.94224e+06	3.94224e+06	3.94224e+06
42	P18065	IGFBP2	Insulin-like growth factor-binding protein 2	2237200	5541800	4384600	3566000	3932400	3932400	3932400
43	P00441	SOD1	Superoxide dismutase [Cu-Zn]	3176600	5766200	5284900	185000	3603175	3603175	3603175
44	P21333	FLNA	Filamin-A	4867600	140110	9355700	36819	3.60006e+06	3.60006e+06	3.60006e+06
45	P60981	DSTN	Destrin	500360	1177700	11620000	940490	3.55964e+06	3.55964e+06	3.55964e+06
46	P01033	TIMP1	Metalloproteinase inhibitor 1	1604500	3190500	5697700	2642100	3283700	3283700	3283700
47	P63220	RPS21	40S ribosomal protein S21	5857900	2115200	-	1617000	2397525	3196700	3196700
48	Q06830	PRDX1	Peroxiredoxin-1	968250	4327000	4635600	2723400	3.16356e+06	3.16356e+06	3.16356e+06
49	P07195	LDHB	L-lactate dehydrogenase B chain	2066400	2871700	4075800	3102500	3029100	3029100	3029100
50	P00761	TRYP	Trysin	912690	4645500	3068500	3457700	3.0211e+06	3.0211e+06	3.0211e+06
51	P06744	GPI	Glucose-6-phosphate isomerase	6410500	-	2611800	31169	2.26337e+06	3017823	3017823
52	P01034	CST3	Cystatin-C	4308700	2732300	-	1892400	2233350	2977800	2977800
53	P16035	TIMP2	Metalloproteinase inhibitor 2	2510100	579520	5709300	-	2199730	2.93297e+06	2.93297e+06
54	P02777	PF4	Platelet factor 4	859890	2494200	3781700	4088300	2.80602e+06	2.80602e+06	2.80602e+06
55	Q14974	KPNB1	Importin subunit beta-1	643790	80180	705470	9515300	2736185	2736185	2736185
56	P04075	ALDOA	Fructose-bisphosphate aldolase A	4705800	60594	3432000	-	2.0496e+06	2732798	2732798
57	P21291	CSRP1	Cysteine and glycine-rich protein 1	53586	4072500	2215200	4319300	2.66515e+06	2.66515e+06	2.66515e+06
58	P52907	CAPZA1	F-actin-capping protein subunit alpha-1	2308100	2359800	3262400	1899700	2457500	2457500	2457500
59	P68104	EEF1A1	Elongation factor 1-alpha 1	605570	6598500	2218000	396800	2.45472e+06	2.45472e+06	2.45472e+06
60	Q14195	DPYSL3	Dihydropyrimidinase-related protein 3	4610200	1952100	2472100	462890	2.37432e+06	2.37432e+06	2.37432e+06
61	P63241	EIF5A	Eukaryotic translation initiation factor 5A-1	4371300	847800	3933900	292360	2361340	2361340	2361340
62	Q99497	PARK7	Protein deglycase DJ-1	52881	1798100	6592100	853880	2.32424e+06	2.32424e+06	2.32424e+06
63	P47755	CAPZA2	F-actin-capping protein subunit alpha-2	2314400	3104000	1382300	2466600	2316825	2316825	2316825
64	Q13361	MFAP5	Microfibrillar-associated protein 5	6419700	91778	-	423610	1733772	2311696	2311696
65	Q16555	DPYSL2	Dihydropyrimidinase-related protein 2	2537300	2172200	3173400	1282700	2291400	2291400	2291400
66	P37837	TALDO1	Transaldolase	106160	505690	8331300	64781	2.25198e+06	2.25198e+06	2.25198e+06
67	P13489	RNH1	Ribonuclease inhibitor	1551500	460350	6285600	678720	2.24404e+06	2.24404e+06	2.24404e+06
68	P60660	MYL6	Myosin light polypeptide 6	3878200	821980	3617000	360300	2169370	2169370	2169370
69	P59998	ARPC4	Actin-related protein 2/3 complex subunit 4	1474100	305240	6508900	202650	2.12272e+06	2.12272e+06	2.12272e+06
70	P46782	RPS5	40S ribosomal protein S5	2827300	688690	2642400	-	1.5396e+06	2.0528e+06	2.0528e+06
71	P47756	CAPZB	F-actin-capping protein subunit beta	884020	1141600	4498300	1635700	2039905	2039905	2039905
72	P26038	MSN	Moesin	3889400	101910	3968700	139870	2024970	2024970	2024970
73	P18206	VCL	Vinculin	3737200	11224	2228300	-	1494181	1.99224e+06	1.99224e+06
74	P08865	RPSA	40S ribosomal protein SA	4063800	524150	2173500	1149600	1.97776e+06	1.97776e+06	1.97776e+06
75	P13693	TPT1	Translationally-controlled tumor protein	-	917880	4625400	266820	1452525	1936700	1936700
76	P07339	CTSD	Cathepsin D	4839900	237350	2476600	135620	1.92237e+06	1.92237e+06	1.92237e+06
77	Q16658	FSCN1	Fascin	3392800	336650	3504400	387080	1.90523e+06	1.90523e+06	1.90523e+06
78	P51884	LUM	Lumican	2303400	1106100	3260100	871670	1.88532e+06	1.88532e+06	1.88532e+06
79	P16949	STMN1	Stathmin	-	3401100	802200	1399600	1400725	1.86763e+06	1.86763e+06
80	P49720	PSMB3	Proteasome subunit beta type-3	2231300	208630	3156600	-	1.39913e+06	1865510	1865510
81	P08253	MMP2	72 kDa type IV collagenase	3153100	678340	2971500	515770	1.82968e+06	1.82968e+06	1.82968e+06
82	O00151	PDLIM1	PDZ and LIM domain protein 1	1802400	1472400	3255400	456870	1.74677e+06	1.74677e+06	1.74677e+06
83	Q07812	BAX	Apoptosis regulator BAX	2537200	175960	2477600	-	1297690	1.73025e+06	1.73025e+06
84	P22692	IGFBP4	Insulin-like growth factor-binding protein 4	184930	1434200	4299900	949180	1.71705e+06	1.71705e+06	1.71705e+06
85	P29279	CTGF	Connective tissue growth factor	58369	2950100	-	2006800	1.25382e+06	1.67176e+06	1.67176e+06
86	Q9NP97	DYNLRB1	Dynein light chain roadblock-type 1	-	1523700	2068700	1397700	1247525	1.66337e+06	1.66337e+06
87	P22314	UBA1	Ubiquitin-like modifier-activating enzyme 1	2337600	392340	3403400	242280	1593905	1593905	1593905
88	P22626	HNRNPA2B1	Heterogeneous nuclear ribonucleoproteins A2/B1	632380	119430	5342600	88208	1.54565e+06	1.54565e+06	1.54565e+06
89	P30041	PRDX6	Peroxiredoxin-6	2476900	464700	2841200	388020	1542705	1542705	1542705
90	Q05682	CALD1	Caldesmon	1158800	405170	922330	3629200	1528875	1528875	1528875
91	O00244	ATOX1	Copper transport protein ATOX1	205640	2731200	-	1579400	1129060	1.50541e+06	1.50541e+06
92	P60842	EIF4A1	Eukaryotic initiation factor 4A-I	972050	-	3143500	322650	1109550	1479400	1479400
93	Q16270	IGFBP7	Insulin-like growth factor-binding protein 7	484050	195750	5170700	62595	1.47827e+06	1.47827e+06	1.47827e+06
94	P17936	IGFBP3	Insulin-like growth factor-binding protein 3	449700	2011000	1359500	1596400	1354150	1354150	1354150
95	O43175	PHGDH	D-3-phosphoglycerate dehydrogenase	922940	1123800	2406200	905500	1339610	1339610	1339610
96	P08123	COL1A2	Collagen alpha-2(I) chain	730060	668770	3516000	285960	1.3002e+06	1.3002e+06	1.3002e+06
97	Q9BWD1	ACAT2	Acetyl-CoA acetyltransferase, cytosolic	327360	1636300	-	1916900	970140	1293520	1293520
98	Q96EK6	GNPNAT1	Glucosamine 6-phosphate N-acetyltransferase	457900	122970	3286200	-	966768	1.28902e+06	1.28902e+06
99	P62081	RPS7	40S ribosomal protein S7	725260	1718000	2161300	517410	1.28049e+06	1.28049e+06	1.28049e+06
100	Q14192	FHL2	Four and a half LIM domains protein 2	1122700	946460	2082700	715210	1.21677e+06	1.21677e+06	1.21677e+06
101	P41250	GARS	Glycine--tRNA ligase	1882700	358950	1926100	415300	1.14576e+06	1.14576e+06	1.14576e+06
102	P61978	HNRNPK	Heterogeneous nuclear ribonucleoprotein K	2274500	119760	2068800	32675	1.12393e+06	1.12393e+06	1.12393e+06
103	O75083	WDR1	WD repeat-containing protein 1	841010	1701800	1518800	407940	1.11739e+06	1.11739e+06	1.11739e+06
104	P51149	RAB7A	Ras-related protein Rab-7a	1770500	516500	1887900	284730	1.11491e+06	1.11491e+06	1.11491e+06
105	P07996	THBS1	Thrombospondin-1	938430	289180	2697800	477070	1100620	1100620	1100620
106	P62873	GNB1	Guanine nucleotide-binding protein G(I)/G(S)/G(T) subunit beta-1	321120	579690	3049800	444060	1.09867e+06	1.09867e+06	1.09867e+06
107	Q9ULV4	CORO1C	Coronin-1C	2566800	151200	562190	-	820048	1.0934e+06	1.0934e+06
108	P23142	FBLN1	Fibulin-1	647370	1822900	822880	1006700	1.07496e+06	1.07496e+06	1.07496e+06
109	Q15365	PCBP1	Poly(rC)-binding protein 1	335410	109450	3768800	73570	1.07181e+06	1.07181e+06	1.07181e+06
110	P24592	IGFBP6	Insulin-like growth factor-binding protein 6	-	1325300	1105600	716870	786942	1.04926e+06	1.04926e+06
111	P0DMV9	HSPA1B	Heat shock 70 kDa protein 1B	1048500	33586	2047800	-	782472	1.0433e+06	1.0433e+06
112	P23381	WARS	Tryptophan--tRNA ligase, cytoplasmic	1646800	426110	1827100	176940	1.01924e+06	1.01924e+06	1.01924e+06
113	P61158	ACTR3	Actin-related protein 3	794540	1336900	984270	899080	1.0037e+06	1.0037e+06	1.0037e+06
114	P68133	ACTA1	Actin, alpha skeletal muscle	342020	768260	2670800	227920	1002250	1002250	1002250
115	O00555	CACNA1A	Voltage-dependent P/Q-type calcium channel subunit alpha-1A	81799	1431300	-	1479500	748150	997533	997533
116	P05452	CLEC3B	Tetranectin	2721000	35419	608220	575810	985112	985112	985112
117	Q13561	DCTN2	Dynactin subunit 2	314800	1073000	2163600	302140	963385	963385	963385
118	P50454	SERPINH1	Serpin H1	142520	1437900	1058900	1003400	910680	910680	910680
119	P23526	AHCY	Adenosylhomocysteinase	816390	1427700	751920	632460	907118	907118	907118
120	P30044	PRDX5	Peroxiredoxin-5, mitochondrial	1042600	975510	1222000	331690	892950	892950	892950
121	Q15019	SEPTIN2	Septin-2	1310700	126920	2031700	100230	892388	892388	892388
122	P08238	HSP90AB1	Heat shock protein HSP 90-beta	1372600	204920	951570	-	632272	843030	843030
123	Q92743	HTRA1	Serine protease HTRA1	1202500	780130	477890	-	615130	820173	820173
124	P07858	CTSB	Cathepsin B	1952100	156240	1104900	51514	816188	816188	816188
125	Q15113	PCOLCE	Procollagen C-endopeptidase enhancer 1	427550	325520	1588100	897130	809575	809575	809575
126	Q9BR76	CORO1B	Coronin-1B	277420	1154100	530490	1265600	806902	806902	806902
127	Q9BRK5	SDF4	45 kDa calcium-binding protein	1303000	1081100	8567.2	820630	803324	803324	803324
128	P46940	IQGAP1	Ras GTPase-activating-like protein IQGAP1	1629800	204660	474770	-	577308	769743	769743
129	P31946	YWHAB	14-3-3 protein beta/alpha	2254900	23286	700270	91881	767584	767584	767584
130	Q15149	PLEC	Plectin	1120200	275450	1455500	186270	759355	759355	759355
131	P61160	ACTR2	Actin-related protein 2	539700	2066400	270880	35972	728238	728238	728238
132	P16152	CBR1	Carbonyl reductase [NADPH] 1	363110	184080	2239400	110610	724300	724300	724300
133	P17987	TCP1	T-complex protein 1 subunit alpha	918260	118020	1059500	-	523945	698593	698593
134	Q9Y696	CLIC4	Chloride intracellular channel protein 4	1179200	103890	1399700	88825	692904	692904	692904
135	Q9UBP4	DKK3	Dickkopf-related protein 3	589250	1064900	561890	555470	692878	692878	692878
136	P05455	SSB	Lupus La protein	833710	-	1015000	226080	518698	691597	691597
137	Q01518	CAP1	Adenylyl cyclase-associated protein 1	889290	169470	1007300	-	516515	688687	688687
138	P55072	VCP	Transitional endoplasmic reticulum ATPase	707610	104250	1863800	49338	681250	681250	681250
139	P61586	RHOA	Transforming protein RhoA	149410	1320000	540190	-	502400	669867	669867
140	P60900	PSMA6	Proteasome subunit alpha type-6	-	356440	1320100	325500	500510	667347	667347
141	O75874	IDH1	Isocitrate dehydrogenase [NADP] cytoplasmic	488610	416690	1286200	470440	665485	665485	665485
142	O43707	ACTN4	Alpha-actinin-4	1323000	17174	651870	-	498011	664015	664015
143	P15311	EZR	Ezrin	1788400	53365	125600	-	491841	655788	655788
144	Q16543	CDC37	Hsp90 co-chaperone Cdc37	417080	738040	780020	-	483785	645047	645047
145	P52209	PGD	6-phosphogluconate dehydrogenase, decarboxylating	644050	531240	1028000	371680	643742	643742	643742
146	P50552	VASP	Vasodilator-stimulated phosphoprotein	16531	594980	1701800	247850	640290	640290	640290
147	P62888	RPL30	60S ribosomal protein L30	889960	452320	546560	-	472210	629613	629613
148	P12081	HARS	Histidine--tRNA ligase, cytoplasmic	225380	935380	481760	871430	628488	628488	628488
149	P02545	LMNA	Prelamin-A/C	1382800	129050	373610	-	471365	628487	628487
150	P24534	EEF1B2	Elongation factor 1-beta	884030	717810	-	265790	466908	622543	622543
151	Q6EMK4	VASN	Vasorin	1053500	323160	703990	400000	620162	620162	620162
152	P32119	PRDX2	Peroxiredoxin-2	265850	356110	1769000	87636	619649	619649	619649
153	P02788	LTF	Lactotransferrin	409840	74023	1831800	158930	618648	618648	618648
154	P02751	FN1	Fibronectin	397420	384270	1679400	8109.7	617300	617300	617300
155	P00568	AK1	Adenylate kinase isoenzyme 1	485660	258340	1101400	-	461350	615133	615133
156	P05121	SERPINE1	Plasminogen activator inhibitor 1	986280	87097	829900	521130	606102	606102	606102
157	P08758	ANXA5	Annexin A5	493500	-	1288700	33245	453861	605148	605148
158	Q9Y490	TLN1	Talin-1	957100	30342	1231900	176010	598838	598838	598838
159	Q96AC1	FERMT2	Fermitin family homolog 2	520250	374560	1140500	319700	588752	588752	588752
160	Q9NQW7	XPNPEP1	Xaa-Pro aminopeptidase 1	637420	90407	1029700	-	439382	585842	585842
161	P20908	COL5A1	Collagen alpha-1(V) chain	81315	160100	2011400	87330	585036	585036	585036
162	P62136	PPP1CA	Serine/threonine-protein phosphatase PP1-alpha catalytic subunit	303910	649180	854810	462300	567550	567550	567550
163	P48643	CCT5	T-complex protein 1 subunit epsilon	402060	1021700	688390	150780	565732	565732	565732
164	P62826	RAN	GTP-binding nuclear protein Ran	1806400	349470	33063	41400	557583	557583	557583
165	Q9Y3F4	STRAP	Serine-threonine kinase receptor-associated protein	361010	841450	433900	552590	547238	547238	547238
166	P78371	CCT2	T-complex protein 1 subunit beta	595520	988930	82638	514150	545310	545310	545310
167	P30520	ADSS	Adenylosuccinate synthetase isozyme 2	-	253760	1104900	270300	407240	542987	542987
168	P11766	ADH5	Alcohol dehydrogenase class-3	322030	142310	1591200	12199	516935	516935	516935
169	Q02818	NUCB1	Nucleobindin-1	1239800	223660	453070	150220	516688	516688	516688
170	Q96IZ0	PAWR	PRKC apoptosis WT1 regulator protein	840320	250080	694020	261140	511390	511390	511390
171	Q99536	VAT1	Synaptic vesicle membrane protein VAT-1 homolog	447410	201570	1234700	152980	509165	509165	509165
172	P31939	ATIC	Bifunctional purine biosynthesis protein PURH	1047400	131420	723610	65173	491901	491901	491901
173	Q9UJ70	NAGK	N-acetyl-D-glucosamine kinase	954100	199300	314410	-	366952	489270	489270
174	Q15942	ZYX	Zyxin	293660	-	654110	498250	361505	482007	482007
175	P09603	CSF1	Macrophage colony-stimulating factor 1	223590	720280	524890	437290	476512	476512	476512
176	O60664	PLIN3	Perilipin-3	502680	358700	878980	147470	471958	471958	471958
177	P00736	C1R	Complement C1r subcomponent	601240	424550	603790	223690	463318	463318	463318
178	Q09666	AHNAK	Neuroblast differentiation-associated protein AHNAK	712440	247870	744790	142460	461890	461890	461890
179	P15559	NQO1	NAD(P)H dehydrogenase [quinone] 1	975990	755910	35709	3548.5	442789	442789	442789
180	P49591	SARS	Serine--tRNA ligase, cytoplasmic	684440	76098	929200	55876	436404	436404	436404
181	P50991	CCT4	T-complex protein 1 subunit delta	818460	343090	453890	129870	436328	436328	436328
182	P28838	LAP3	Cytosol aminopeptidase	825910	343790	234570	330460	433682	433682	433682
183	P07093	SERPINE2	Glia-derived nexin	533170	161370	902060	108490	426272	426272	426272
184	Q13492	PICALM	Phosphatidylinositol-binding clathrin assembly protein	920980	141390	578500	59570	425110	425110	425110
185	P02771	AFP	Alpha Fetoprotein	222000	236810	1197300	31461	421893	421893	421893
186	O60701	UGDH	UDP-glucose 6-dehydrogenase	1133000	286520	124120	122850	416622	416622	416622
187	Q8IWE2	FAM114A1	Protein NOXP20	375000	-	474550	377350	306725	408967	408967
188	P09871	C1S	Complement C1s subcomponent	146510	415780	758500	312540	408332	408332	408332
189	P06748	NPM1	Nucleophosmin	836570	110070	-	248800	298860	398480	398480
190	P07741	APRT	Adenine phosphoribosyltransferase	277610	-	231520	672160	295322	393763	393763
191	P62491	RAB11A	Ras-related protein Rab-11A	381940	380710	531590	270890	391282	391282	391282
192	P42224	STAT1	Signal transducer and activator of transcription 1-alpha/beta	211090	32669	908190	-	287987	383983	383983
193	P30153	PPP2R1A	Serine/threonine-protein phosphatase 2A 65 kDa regulatory subunit A alpha isoform	635360	105660	680250	59726	370249	370249	370249
194	O43852	CALU	Calumenin	21347	580780	545210	324530	367967	367967	367967
195	Q96AG4	LRRC59	Leucine-rich repeat-containing protein 59	60397	390580	788940	227640	366889	366889	366889
196	O60925	PFDN1	Prefoldin subunit 1	484120	210460	383670	-	269562	359417	359417
197	P38606	ATP6V1A	V-type proton ATPase catalytic subunit A	555800	151860	339090	-	261688	348917	348917
198	P49368	CCT3	T-complex protein 1 subunit gamma	353730	191320	570450	267510	345752	345752	345752
199	O00628	PEX7	Peroxisomal targeting signal 2 receptor	114420	193080	720570	-	257018	342690	342690
200	P62140	PPP1CB	Serine/threonine-protein phosphatase PP1-beta catalytic subunit	254560	-	715800	43356	253429	337905	337905
201	P20810	CAST	Calpastatin	624600	247280	310230	152930	333760	333760	333760
202	P27816	MAP4	Microtubule-associated protein 4	577720	249300	372070	133030	333030	333030	333030
203	Q96TA1	FAM129B	Niban-like protein 1	484560	58993	445480	-	247258	329678	329678
204	P01023	A2M	Alpha-2-Macroglobulin	193610	184480	792210	133260	325890	325890	325890
205	P00325	ADH1B	Alcohol dehydrogenase 1B	133180	239180	569980	351470	323452	323452	323452
206	P12277	CKB	Creatine kinase B-type	397910	107060	430930	-	233975	311967	311967
207	Q9NZN4	EHD2	EH domain-containing protein 2	548050	93677	284940	-	231667	308889	308889
208	P07585	DCN	Decorin	15880	27261	871510	-	228663	304884	304884
209	P48444	ARCN1	Coatomer subunit delta	388710	33080	485780	-	226892	302523	302523
210	Q9Y2D5	AKAP2	A-kinase anchor protein 2	177530	297520	301480	375230	287940	287940	287940
211	P55209	NAP1L1	Nucleosome assembly protein 1-like 1	456990	162710	235160	-	213715	284953	284953
212	O00148	DDX39A	ATP-dependent RNA helicase DDX39A	34748	43022	760120	-	209472	279297	279297
213	P12956	XRCC6	X-ray repair cross-complementing protein 6	325530	185550	309750	-	205208	273610	273610
214	Q16222	UAP1	UDP-N-acetylhexosamine pyrophosphorylase	149880	302130	368010	-	205005	273340	273340
215	O60784	TOM1	Target of Myb protein 1	424650	122280	463180	63481	268398	268398	268398
216	Q15691	MAPRE1	Microtubule-associated protein RP/EB family member 1	84497	161120	503440	323610	268167	268167	268167
217	Q96CT7	CCDC124	Coiled-coil domain-containing protein 124	938850	28558	25063	66629	264775	264775	264775
218	P40926	MDH2	Malate dehydrogenase, mitochondrial	232760	77015	482030	-	197951	263935	263935
219	P10301	RRAS	Ras-related protein R-Ras	-	216730	196110	326930	184942	246590	246590
220	Q9H4M9	EHD1	EH domain-containing protein 1	18344	341450	329060	269370	239556	239556	239556
221	Q12805	EFEMP1	EGF-containing fibulin-like extracellular matrix protein 1	45873	-	619120	48526	178380	237840	237840
222	P19022	CDH2	Cadherin-2	177790	193090	489000	73605	233371	233371	233371
223	Q9BUF5	TUBB6	Tubulin beta-6 chain	21214	357390	217750	333580	232484	232484	232484
224	Q8N126	CADM3	Cell adhesion molecule 3	314520	186280	337950	87900	231662	231662	231662
225	O94985	CLSTN1	Calsyntenin-1	147460	136480	410220	-	173540	231387	231387
226	O75369	FLNB	Filamin-B	207840	17288	658440	14032	224400	224400	224400
227	P40227	CCT6A	T-complex protein 1 subunit zeta	-	178500	384360	107540	167600	223467	223467
228	P42330	AKR1C3	Aldo-keto reductase family 1 member C3	41670	343710	272560	-	164485	219313	219313
229	Q14766	LTBP1	Latent-transforming growth factor beta-binding protein 1	416970	108320	-	127080	163092	217457	217457
230	P30101	PDIA3	Protein disulfide-isomerase A3	406850	184960	262180	7486.7	215369	215369	215369
231	Q96KP4	CNDP2	Cytosolic non-specific dipeptidase	145970	43457	615180	48202	213202	213202	213202
232	Q92626	PXDN	Peroxidasin homolog	91967	329770	-	217730	159867	213156	213156
233	Q9UNH7	SNX6	Sorting nexin-6	284650	142710	349860	71536	212189	212189	212189
234	P55786	NPEPPS	Puromycin-sensitive aminopeptidase	387110	34153	409290	5999.4	209138	209138	209138
235	Q96HC4	PDLIM5	PDZ and LIM domain protein 5	463160	95103	242420	19099	204946	204946	204946
236	P49747	COMP	Cartilage oligomeric matrix protein	-	206160	307720	78646	148132	197509	197509
237	P12111	COL6A3	Collagen alpha-3(VI) chain	397450	8338.2	185160	-	147737	196983	196983
238	Q01813	PFKP	ATP-dependent 6-phosphofructokinase, platelet type	416680	66577	286010	13325	195648	195648	195648
239	P11217	PYGM	Glycogen phosphorylase, muscle accociated	420710	53223	238610	61111	193414	193414	193414
240	Q7KZF4	SND1	Staphylococcal nuclease domain-containing protein 1	248390	28525	447940	24513	187342	187342	187342
241	O00154	ACOT7	Cytosolic acyl coenzyme A thioester hydrolase	67273	229910	307860	139420	186116	186116	186116
242	P50990	CCT8	T-complex protein 1 subunit theta	189700	119700	307530	110790	181930	181930	181930
243	P61019	RAB2A	Ras-related protein Rab-2A	211160	38208	285810	-	133794	178393	178393
244	O00391	QSOX1	Sulfhydryl oxidase 1	4151.9	112710	411500	-	132090	176121	176121
245	P35579	MYH9	Myosin-9	162780	139110	325720	75695	175826	175826	175826
246	Q14767	LTBP2	Latent-transforming growth factor beta-binding protein 2	491330	60123	82594	22251	164074	164074	164074
247	P35052	GPC1	Glypican-1	43574	206190	-	232510	120568	160758	160758
248	P53396	ACLY	ATP-citrate synthase	44168	191110	244940	156780	159250	159250	159250
249	P08603	CFH	Complement factor H	55244	322360	18682	235980	158066	158066	158066
250	Q9P2E9	RRBP1	Ribosome-binding protein 1	240520	119570	169300	48180	144392	144392	144392
251	P26196	DDX6	Probable ATP-dependent RNA helicase DDX6	40918	56341	330560	-	106955	142606	142606
252	P07686	HEXB	Beta-hexosaminidase subunit beta	89428	248840	84351	121850	136117	136117	136117
253	P21399	ACO1	Cytoplasmic aconitate hydratase	114670	47430	244440	-	101635	135513	135513
254	O60443	DFNA5	Non-syndromic hearing impairment protein 5	181830	75545	229560	50466	134350	134350	134350
255	Q16610	ECM1	Extracellular matrix protein 1	120400	103500	198160	111680	133435	133435	133435
256	Q93052	LPP	Lipoma-preferred partner	207820	132430	42623	-	95718.2	127624	127624
257	Q76M96	CCDC80	Coiled-coil domain-containing protein 80	272520	40482	132300	30023	118831	118831	118831
258	Q96DL1	NXPE2	NXPE family member 2	109160	58674	-	182680	87628.5	116838	116838
259	Q92945	KHSRP	Far upstream element-binding protein 2	344410	14199	91902	10539	115262	115262	115262
260	P07814	EPRS	Bifunctional glutamate/proline--tRNA ligase	100250	44575	253020	41769	109904	109904	109904
261	P14543	NID1	Nidogen-1	-	45826	106900	148200	75231.5	100309	100309
262	P45974	USP5	Ubiquitin carboxyl-terminal hydrolase 5	208930	36021	119020	31019	98747.5	98747.5	98747.5
263	Q9Y6C2	EMILIN1	EMILIN-1	67967	137980	96473	77359	94944.8	94944.8	94944.8
264	Q96QK1	VPS35	Vacuolar protein sorting-associated protein 35	85816	-	111930	87025	71192.8	94923.7	94923.7
265	O95965	ITGBL1	Integrin beta-like protein 1	114110	71009	-	98819	70984.5	94646	94646
266	P49588	AARS	Alanine--tRNA ligase, cytoplasmic	32845	213670	75038	56261	94453.5	94453.5	94453.5
267	Q00341	HDLBP	Vigilin	46733	149440	69573	105460	92801.5	92801.5	92801.5
268	P02461	COL3A1	Collagen alpha-1(III) chain	19867	31420	226160	-	69361.8	92482.3	92482.3
269	P12109	COL6A1	Collagen alpha-1(VI) chain	180230	-	92854	2600.7	68921.2	91894.9	91894.9
270	P09960	LTA4H	Leukotriene A-4 hydrolase	134560	22662	182670	14293	88546.2	88546.2	88546.2
271	Q7Z7G0	ABI3BP	Target of Nesh-SH3	193140	-	16597	24523	58565	78086.7	78086.7
272	Q14247	CTTN	Src substrate cortactin	74078	56795	27368	141550	74947.8	74947.8	74947.8
273	Q6UVK1	CSPG4	Chondroitin sulfate proteoglycan 4	55722	79930	-	73233	52221.2	69628.3	69628.3
274	O95633	FSTL3	Follistatin-related protein 3	112430	-	33731	27665	43456.5	57942	57942
275	Q01082	SPTBN1	Spectrin beta chain, non-erythrocytic 1	72911	46650	92045	9742.3	55337.1	55337.1	55337.1
276	P28482	MAPK1	Mitogen-activated protein kinase 1	46349	31739	116590	6361.4	50259.8	50259.8	50259.8
277	Q13813	SPTAN1	Spectrin alpha chain, non-erythrocytic 1	109000	26845	32408	23475	47932	47932	47932
278	P98160	HSPG2	Basement membrane-specific heparan sulfate proteoglycan core protein	24167	12127	100130	47200	45906	45906	45906
279	P35555	FBN1	Fibrillin-1	54167	19174	46015	61949	45326.2	45326.2	45326.2
280	P54652	HSPA2	Heat shock-related 70 kDa protein 2	92691	24706	-	16667	33516	44688	44688
281	Q8WWI1	LMO7	LIM domain only protein 7	78555	45770	3040.7	37879	41311.2	41311.2	41311.2
282	P46821	MAP1B	Microtubule-associated protein 1B	65175	5673.1	84958	7371.3	40794.3	40794.3	40794.3
283	Q14204	DYNC1H1	Cytoplasmic dynein 1 heavy chain 1	114450	1841.2	13672	18706	37167.3	37167.3	37167.3
284	P49327	FASN	Fatty acid synthase	9085.8	22359	41912	19047	23101	23101	23101
