# Supplementary material for: Interplay between Cultured Human Osteoblastic and Skeletal Muscle Cells: Effects of Conditioned Media on Glucose and Fatty Acid Metabolism
Source: MDPI journal article supplement (doi:10.3390/biomedicines11112908), 2023-10-27
Supplement: s1 [file Suppl.Table_S2_Secretome_SKM-CM.xlsx]

## Sheet: Sheet1
	Protein Ids	Protein symbol	Protein names	iBAQ Donor 1	iBAQ Donor 2	iBAQ Donor 3	iBAQ Donor 4	iBAQ Donor 5	iBAQ Donor 6	iBAQ Donor 7	Intensity mean
1	P63313	TMSB10	Thymosin beta-10	449320000	189180000	436720000	334060000	265810000	664600000	300860000	3.77221e+08			Kan tas bort
2	P62328	TMSB4X	Thymosin beta-4	402510000	115510000	390890000	273860000	318070000	583830000	291670000	3.39477e+08
3	P63261	ACTG1	Actin, cytoplasmic 2	121780000	34893000	127800000	70410000	65998000	369150000	40202000	1.18605e+08
4	P07737	PFN1	Profilin-1	75753000	21480000	107950000	45775000	78635000	230560000	43668000	8.62601e+07
5	P02795	MT2A	Metallothionein-2	71353000	28023000	27045000	64766000	60540000	195770000	77737000	7.50334e+07
6	P08670	VIM	Vimentin	93579000	39805000	97297000	75263000	35820000	102880000	43670000	6.97591e+07
7	P09486	SPARC	SPARC	61378000	57083000	83980000	58716000	30831000	125150000	53970000	6.73011e+07
8	P63104	YWHAZ	Tyrosine 3-monooxygenase/tryptophan 5-monooxygenase activation zeta	78069000	25272000	68860000	36303000	45010000	165430000	48091000	6.67193e+07
9	P08123	COL1A2	Collagen alpha-2(I) chain	57027000	60531000	44423000	109470000	3422400	71990000	83274000	61448200
10	P09382	LGALS1	Galectin-1	53433000	13472000	51318000	49424000	19332000	173650000	48485000	5.84449e+07
11	P02452	COL1A1	Collagen alpha-1(I) chain	51384000	36710000	41406000	65092000	5845700	83119000	83583000	5.24485e+07
12	P0DP25	CALM3	Calmodulin-3	41489000	18568000	48457000	30408000	58307000	96288000	56274000	4.99701e+07
13	P07951	TPM2	Tropomyosin 2	28252000	3558200	67447000	9164400	32522000	205230000	2578600	4.98217e+07
14	P62258	YWHAE	Tyrosine 3-monooxygenase/tryptophan 5-monooxygenase activation epsilon	38257000	19474000	51576000	17421000	45627000	96317000	24490000	4.18803e+07
15	Q16270	IGFBP7	Insulin-like growth factor-binding protein 7	29712000	5925700	52555000	33230000	7839900	125560000	18219000	3.90059e+07
16	P17661	DES	Desmin	41888000	2129000	49176000	6744100	41423000	115860000	4227600	3.73497e+07
17	P41222	PTGDS	Prostaglandin D2 synthase	47154000	5907200	28349000	52753000	46948000	25053000	36725000	3.46985e+07
18	P10599	TXN	Thioredoxin	31858000	23678000	50276000	16322000	27526000	63561000	18090000	3.30444e+07
19	P01033	TIMP1	TIMP metallopeptidase inhibitor 1	41277000	29577000	27761000	45246000	4761200	41353000	23681000	3.05223e+07
20	P06454	PTMA	Prothymosin alpha	33771000	13243000	-	-	20724000	39516000	31218000	27694400
21	P67936	TPM4	Tropomyosin alpha-4 chain	21088000	8792500	24869000	18554000	15624000	39307000	33731000	2.31379e+07
22	P48681	NES	Nestin	17102000	929530	22861000	5320800	15687000	94365000	2020200	2.26122e+07
23	Q71U36	TUBA1A	Tubulin alpha-1A chain	17998000	5570600	27747000	12613000	14101000	62356000	7589100	2.11392e+07
24	P23528	CFL1	Cofilin-1	25038000	5009700	25770000	11615000	15424000	55790000	8486900	2.10191e+07
25	P06733	ENO1	Alpha-enolase	27450000	8145400	22173000	10283000	10815000	44469000	12889000	1.94606e+07
26	P14618	PKM	Pyruvate kinase PKM	20093000	3298200	16837000	7264700	13883000	63561000	6353400	1.87558e+07
27	P61981	YWHAG	14-3-3 protein gamma	9812400	2844100	19599000	9149800	7624900	71707000	5704700	1.80631e+07
28	P11021	HSPA5	78 kDa glucose-regulated protein	17688000	10225000	15535000	16504000	9080000	40637000	15159000	1.78326e+07
29	P30041	PRDX6	Peroxiredoxin-6	14705000	2813100	15171000	6864100	12315000	53699000	4437900	1.5715e+07
30	P02461	COL3A1	Collagen alpha-1(III) chain	14638000	11581000	4887200	26268000	780310	7294700	43949000	1.56283e+07
31	P60709	ACTB	Actin, cytoplasmic 1	22403000	5726400	15233000	15862000	8430900	31385000	9027500	1.54383e+07
32	O43852	CALU	Calumenin	15551000	4138600	20870000	9464500	8181600	26890000	16546000	1.45202e+07
33	P00441	SOD1	Superoxide dismutase [Cu-Zn]	20080000	5933100	14025000	5855500	15639000	18251000	19040000	1.41177e+07
34	P04075	ALDOA	Fructose-bisphosphate aldolase A	14435000	4026300	17764000	5569700	12659000	34905000	7315500	1.38106e+07
35	P07585	DCN	Decorin	15833000	14320000	4239000	21235000	1604100	3595000	35645000	1.37816e+07
36	P02545	LMNA	Lamin-A/C	8411400	2541500	14853000	7829700	8550700	47714000	2145900	1.31495e+07
37	Q14019	COTL1	Coactosin-like protein	21228000	4885700	17987000	17095000	2637900	13975000	12991000	1.29714e+07
38	P36955	SERPINF1	Pigment epithelium-derived factor	8701500	6602100	11508000	26961000	5141300	9340500	19403000	1.25225e+07
39	P09493	TPM1	Tropomyosin alpha-1 chain	6059100	506590	15566000	1946800	11821000	49468000	861800	12318470
40	P80723	BASP1	Brain acid soluble protein 1	14245000	8502100	8425300	11194000	5571700	20063000	16690000	1.20987e+07
41	P31949	S100A11	Protein S100-A11	12573000	12792000	18361000	6501900	3693600	24060000	6615100	1.20852e+07
42	P27797	CALR	Calreticulin	12378000	3472700	13663000	10605000	6915700	20303000	16763000	1.20143e+07
43	P62937	PPIA	Peptidyl-prolyl cis-trans isomerase A	13707000	2759400	15419000	9958800	7453300	29512000	4310400	1.18743e+07
44	P20962	PTMS	Parathymosin	6541700	2737300	11781000	5622000	5045100	39460000	-	1.18645e+07
45	Q96A32	MYLPF	Myosin regulatory light chain 2, skeletal muscle isoform	4766000	159940	10835000	2472400	5714600	58190000	259420	1.17711e+07
46	P08253	MMP2	72 kDa type IV collagenase	11838000	10102000	8017900	19798000	2905500	10096000	19043000	1.16858e+07
47	P51884	LUM	Lumican	9608900	9571200	19526000	15514000	6205000	8088800	12346000	1.15514e+07
48	P00338	LDHA	L-lactate dehydrogenase A chain	15131000	4997900	12845000	4062700	14835000	13604000	13093000	1.12241e+07
49	P62736	ACTA2	Actin, aortic smooth muscle	9045000	675610	9541200	2620200	5959400	49255000	910820	11143890
50	P30101	PDIA3	Protein disulfide-isomerase A3	13498000	6117200	10757000	9206800	7931300	13920000	13287000	10673900
51	P06732	CKM	Creatine kinase M-type	8662600	200660	10739000	767430	22483000	30455000	329230	10519560
52	P04406	GAPDH	Glyceraldehyde-3-phosphate dehydrogenase	6366000	1921600	12771000	3030100	8517000	35632000	3236600	1.02106e+07
53	P63316	TNNC1	Troponin C, slow skeletal and cardiac muscles	2390500	-	9055500	1537800	6374400	39575000	1707800	1.01068e+07
54	P23284	PPIB	Peptidyl-prolyl cis-trans isomerase B	8427700	7601100	11512000	8086700	9302100	11848000	13299000	1.00109e+07
55	P07237	P4HB	Protein disulfide-isomerase	8978300	5613200	12259000	7590600	6451800	21241000	7557000	9.95584e+06
56	P08238	HSP90AB1	Heat shock protein HSP 90-beta	7495200	1686300	9565800	4088200	4439600	37134000	2469500	9.55409e+06
57	P16949	STMN1	Stathmin	8379700	419730	14226000	1819700	8213400	32443000	1072200	9.51053e+06
58	P09871	C1S	Complement C1s subcomponent	9798900	10781000	1399900	17060000	441760	1778500	21078000	8.90544e+06
59	Q15113	PCOLCE	Procollagen C-endopeptidase enhancer 1	3425900	4380500	806040	20102000	-	2598200	22064000	8.89611e+06
60	P04792	HSPB1	Heat shock protein beta-1	7919300	1826200	13147000	4675000	7754100	23185000	2953500	8.78001e+06
61	P11047	LAMC1	Laminin subunit gamma-1	6488000	7400300	3103400	15896000	835300	3852400	22493000	8581200
62	P19237	TNNI1	Troponin I, slow skeletal muscle	3170400	420060	5470200	559090	1462600	39999000	-	8.51356e+06
63	P26447	S100A4	Protein S100-A4	7154200	2482100	15150000	8052600	9276200	14842000	2417000	8.48201e+06
64	P05121	SERPINE1	Plasminogen activator inhibitor 1	10801000	8506300	8231200	3419400	655200	17451000	7324100	8.05546e+06
65	P12109	COL6A1	Collagen alpha-1(VI) chain	7391300	7712400	5081400	15343000	501460	10064000	9935200	8.00411e+06
66	Q8NDC0	MAPK1IP1L	MAPK-interacting and spindle-stabilizing protein-like	7458300	1939400	7549800	4779900	6061500	22479000	2855700	7.58909e+06
67	P07602	PSAP	Prosaposin	5814900	4373400	10668000	8682800	4543800	9530400	9471700	7.58357e+06
68	Q12805	EFEMP1	EGF-containing fibulin-like extracellular matrix protein 1	8030000	14480000	2297200	10537000	419990	2192500	14764000	7.53153e+06
69	P62942	FKBP1A	Peptidyl-prolyl cis-trans isomerase FKBP1A	3878900	1821800	5023200	3987300	3619300	31613000	2687900	7.51877e+06
70	P30086	PEBP1	Phosphatidylethanolamine-binding protein 1	8013400	1351800	10378000	4299800	9993300	15072000	3347600	7493700
71	P13693	TPT1	Translationally-controlled tumor protein	6629200	1408400	5835900	2594600	4516800	26506000	4142100	7.37614e+06
72	P11142	HSPA8	Heat shock cognate 71 kDa protein	8420300	2192900	7487800	3926700	4148800	22492000	2486600	7.30787e+06
73	P61916	NPC2	Epididymal secretory protein E1	5589000	2207600	3951300	5516800	8641600	20265000	3771900	7.13474e+06
74	Q15843	NEDD8	NEDD8	4923100	1120600	5170500	3789200	3065500	26571000	5225400	7.12361e+06
75	Q06830	PRDX1	Peroxiredoxin-1	7192800	2911500	8625900	3060700	3799800	20263000	2263600	6873900
76	Q8NHM4	PRSS3P2	Putative trypsin-6	6113600	7245200	4613400	5880300	6791600	9057000	8150500	6.83594e+06
77	O43707	ACTN4	Alpha-actinin-4	4711900	1273300	10100000	2619600	7310300	18770000	3049500	6.83351e+06
78	Q01995	TAGLN	Transgelin	4761300	428830	5531300	2478900	2631400	30336000	1600400	6.82402e+06
79	P05413	FABP3	Fatty acid-binding protein, heart	2419300	383830	11189000	1528400	4710700	20633000	-	6810705
80	P26022	PTX3	Pentraxin-related protein PTX3	8980300	10198000	4762600	5427900	94279	6593200	11595000	6.80733e+06
81	Q6FHJ7	SFRP4	Secreted frizzled-related protein 4	16895000	6590100	4005000	5160400	571470	3123400	9929700	6.61072e+06
82	P67809	YBX1	Nuclease-sensitive element-binding protein 1	5246000	611210	7235800	3623800	6113700	20655000	2516300	6.57169e+06
83	Q96D15	RCN3	Reticulocalbin-3	8400700	4429400	4179700	8263300	2453200	6218200	11279000	6460500
84	P07108	DBI	Acyl-CoA-binding protein	595800	637370	7905900	3567600	8196100	22186000	596190	6.24071e+06
85	P68371	TUBB4B	Tubulin beta-4B chain	6626600	642610	5332000	2167600	4933100	22513000	922850	6.16254e+06
86	P31946	YWHAB	14-3-3 protein beta/alpha	4673500	2844900	8472600	3549200	5148100	14389000	3453600	6.07584e+06
87	P35609	ACTN2	Alpha-actinin-2	4743700	452350	8758700	1377200	5230300	21359000	491400	6058950
88	Q12841	FSTL1	Follistatin-related protein 1	6099000	6932700	3607100	7667600	538130	7621900	8632400	5.87126e+06
89	P07858	CTSB	Cathepsin B	5850800	4473300	7796200	5830300	4358500	6242900	6500800	5.86469e+06
90	Q99497	PARK7	Protein deglycase DJ-1	7780500	1414400	7567000	2751000	4295800	13438000	3764300	5.85871e+06
91	Q9P1F3	ABRACL	Costars family protein ABRACL	4127900	130400	1864600	1380900	9239600	13476000	9639500	5.69413e+06
92	P61970	NUTF2	Nuclear transport factor 2	3340900	807870	555880	-	2710500	23956000	2129000	5.58336e+06
93	P10124	SRGN	Serglycin	9141200	3098800	11976000	2089500	702050	9401500	2630600	5.57709e+06
94	P06753	TPM3	Tropomyosin alpha-3 chain	6310400	228370	2870300	4509900	4656600	18608000	1456600	5.52002e+06
95	P14314	PRKCSH	Glucosidase 2 subunit beta	6397800	2803700	6409200	4292500	4549200	8703800	5412500	5.50981e+06
96	P05386	RPLP1	60S acidic ribosomal protein P1	1697400	2253000	915820	1020400	5133800	8144000	18567000	5.3902e+06
97	P05976	MYL1	Myosin light chain 1/3, skeletal muscle isoform	3356300	-	2080900	242210	5062300	16006000	-	5349542
98	P62979	RPS27A	Ubiquitin-40S ribosomal protein S27a	4826900	1681000	7335600	2352600	6387100	12344000	2234600	5.30883e+06
99	P84090	ERH	Enhancer of rudimentary homolog	3539600	1175100	5400500	4256400	2807700	17740000	2201700	5303000
100	Q15293	RCN1	Reticulocalbin-1	3788100	2356400	4113100	4682400	5581300	6548800	9884700	5.27926e+06
101	P23142	FBLN1	Fibulin-1	6454700	12114000	102250	7488400	115760	687360	9852800	5.25932e+06
102	P60174	TPI1	Triosephosphate isomerase	2873100	874500	7059100	2328700	6026500	11908000	4260800	5.04724e+06
103	P07195	LDHB	L-lactate dehydrogenase B chain	4084300	3577400	5267000	2826100	4748800	9643100	3422700	4.79563e+06
104	P07900	HSP90AA1	Heat shock protein HSP 90-alpha	4613400	1740000	3945700	2866600	1596900	15963000	2787400	4.78757e+06
105	P26038	MSN	Moesin	6949800	1367500	7652900	4134300	1895800	9184300	1750700	4.70504e+06
106	P10909	CLU	Clusterin	3115600	5681500	-	2417500	195160	609200	14028000	4341160
107	P05387	RPLP2	60S acidic ribosomal protein P2	2061400	678120	5850100	6544000	2542900	9256700	3404600	4.33397e+06
108	P52565	ARHGDIA	Rho GDP-dissociation inhibitor 1	4421900	1019800	4585100	1986400	4254500	10806000	3216700	4327200
109	P00736	C1R	Complement C1r subcomponent	2777200	6309600	245680	9771600	162100	707270	10011000	4.28349e+06
110	O00299	CLIC1	Chloride intracellular channel protein 1	4079000	1410700	4646100	2645100	2532300	10966000	3650000	4275600
111	P27348	YWHAQ	14-3-3 protein theta	5154000	1122700	4525300	2978800	2627900	11562000	1333000	4.18624e+06
112	P63220	RPS21	40S ribosomal protein S21	2753900	615760	3702900	2986000	1541200	16091000	1196200	4.12671e+06
113	Q9Y281	CFL2	Cofilin-2	5053200	580010	4945300	1443200	2527000	13374000	216700	4.01992e+06
114	P16035	TIMP2	Metalloproteinase inhibitor 2	4399000	1975300	2605500	5869300	636190	8018100	4167000	3.95291e+06
115	P14625	HSP90B1	Endoplasmin	3920600	2112000	3269600	4417600	1794900	8792200	2993400	3.90004e+06
116	P02751	FN1	Fibronectin	3499500	2934500	3168200	5289200	383850	6928100	5082700	3.89801e+06
117	P09211	GSTP1	Glutathione S-transferase P	5355800	1840500	3287600	3012700	1541500	9661800	2347600	3.86393e+06
118	P35754	GLRX	Glutaredoxin-1	4108300	1205400	3110600	2259000	2778500	9391800	3642100	3785100
119	P00352	ALDH1A1	Retinal dehydrogenase 1	7496200	298760	3975400	610630	4538600	8276000	876980	3.72465e+06
120	P14649	MYL6B	Myosin light chain 6B	2195600	121590	4409400	639030	2362500	15543000	18631	3.61282e+06
121	P00751	CFB	Complement factor B	1573500	3578400	43606	1055000	-	184020	14712000	3524421
122	Q05682	CALD1	Caldesmon	2312600	874360	5257800	2239300	1644100	10628000	1484400	3.49151e+06
123	P31947	SFN	14-3-3 protein sigma	3197300	1173800	5556500	1099800	3049500	9147400	750890	3.42503e+06
124	P30050	RPL12	60S ribosomal protein L12	1314500	1120700	1920400	2370500	1497600	11707000	3933100	3.40911e+06
125	P13667	PDIA4	Protein disulfide-isomerase A4	3808600	1952300	3230300	2887000	2828600	6012200	3105100	3.40344e+06
126	P06396	GSN	Gelsolin	2490700	1167900	3748700	3313800	1634000	8777700	2029900	3.30896e+06
127	Q15582	TGFBI	Transforming growth factor-beta-induced protein ig-h3	1639100	4576700	2147500	6849300	675780	4608800	2535700	3.29041e+06
128	P29692	EEF1D	Elongation factor 1-delta	2619800	1984700	3167900	1548800	2117600	10455000	1075300	3281300
129	P22392	NME2	Nucleoside diphosphate kinase B	4567300	1792200	2967700	1364400	1348700	7580600	3296000	3.27384e+06
130	P60981	DSTN	Destrin	2508200	1002500	3119100	1902800	364740	12775000	1100000	3.25319e+06
131	P54727	RAD23B	UV excision repair protein RAD23 homolog B	2226700	558730	5293300	1854000	1136000	8610900	2603400	3183290
132	P29966	MARCKS	Myristoylated alanine-rich C-kinase substrate	3590200	888710	2737800	2736000	1768900	8674300	1757100	3.16472e+06
133	Q14315	FLNC	Filamin-C	2213300	245450	3046700	720490	1903300	13312000	589810	3.14729e+06
134	Q14847	LASP1	LIM and SH3 domain protein 1	1141400	550460	5802000	1482800	2118900	9818100	1051500	3137880
135	P27816	MAP4	Microtubule-associated protein 4	3292200	917300	3221400	2932000	1839800	7237500	2260500	3100100
136	Q01105	SET	Protein SET	959820	784140	1240600	1957000	545280	12498000	3701300	3098020
137	P22626	HNRNPA2B1	Heterogeneous nuclear ribonucleoproteins A2/B1	1896600	203520	2041900	1836600	1080600	10610000	3289800	2.99415e+06
138	P55072	VCP	Transitional endoplasmic reticulum ATPase	2936300	839550	2835100	1905800	3560400	7518100	1009200	2.94349e+06
139	P07355	ANXA2	Annexin A2	2020700	3077400	688830	2995000	4328600	3838600	3549500	2.92838e+06
140	O75368	SH3BGRL	SH3 domain-binding glutamic acid-rich-like protein	2051400	1370100	4111400	1541200	3182700	5522200	2496600	2.89651e+06
141	P55145	MANF	Mesencephalic astrocyte-derived neurotrophic factor	1507400	1135600	2634800	2526400	1665300	7071900	3664400	2.88654e+06
142	Q9UK76	HN1	Hematological and neurological expressed 1 protein	2214600	519370	2750100	868190	2451000	10204000	990930	2.85688e+06
143	Q15063	POSTN	Periostin	356760	375750	2380300	4384200	130680	11788000	510870	2.84665e+06
144	P12277	CKB	Creatine kinase B-type	2652800	118020	4041600	354460	2208700	9923500	569500	2.83837e+06
145	Q9H299	SH3BGRL3	SH3 domain-binding glutamic acid-rich-like protein 3	5838700	380410	6244300	512420	1557000	4760800	323140	2.8024e+06
146	Q969H8	MYDGF	Myeloid-derived growth factor	3236000	1189400	3109400	1926700	2177700	5182100	2644100	2.78077e+06
147	P00558	PGK1	Phosphoglycerate kinase 1	2754700	569340	2980300	603740	3287700	7805700	1378500	2.76857e+06
148	P37802	TAGLN2	Transgelin-2	3253100	877570	1990400	1459600	1216800	9769400	723770	2.75581e+06
149	P01024	C3	Complement C3	1949100	2096600	55870	2795900	10567	136330	12049000	2.72762e+06
150	Q99584	S100A13	Protein S100-A13	4852600	399600	1292600	848270	2865700	7945800	829240	2.71912e+06
151	O95965	ITGBL1	Integrin beta-like protein 1	3104800	2071900	3397000	2493800	1856400	4938200	950760	2.68755e+06
152	Q13542	EIF4EBP2	Eukaryotic translation initiation factor 4E-binding protein 2	3199200	609900	2402300	1360000	1628100	7924900	1679700	2686300
153	P68104	EEF1A1	Elongation factor 1-alpha 1	2556900	296120	3507400	610510	974010	9738900	886460	2652900
154	P62316	SNRPD2	Small nuclear ribonucleoprotein Sm D2	3086200	183790	1997300	1726900	1439200	7392400	2327200	2.59328e+06
155	Q9NQC3	RTN4	Reticulon-4	1607400	479180	2079200	499070	2088700	10855000	510220	2.5884e+06
156	P46782	RPS5	40S ribosomal protein S5	1929900	-	2083300	1212100	1204800	8141200	707000	2.54638e+06
157	O14907	TAX1BP3	Tax1-binding protein 3	3093500	1414300	3148300	2531500	1291300	5537100	477450	2.49906e+06
158	P24592	IGFBP6	Insulin-like growth factor-binding protein 6	4160800	2920300	470300	2204800	365410	1778100	5531200	2490130
159	P01034	CST3	Cystatin-C	2936900	3368100	2001700	679740	1070600	2867200	4457600	2483120
160	P45378	TNNT3	Troponin T, fast skeletal muscle	-	304530	459880	378440	2018100	11532000	176760	2478285
161	P58546	MTPN	Myotrophin	2382300	875300	2712900	1353500	1819000	7609600	526910	2.4685e+06
162	O60662	KLHL41	Kelch-like protein 41	2393300	147140	2529900	556040	1590600	9791800	103340	2.44459e+06
163	P25398	RPS12	40S ribosomal protein S12	2198400	466190	2082900	1063300	1374400	9091000	780210	2.43663e+06
164	P17096	HMGA1	High mobility group protein HMG-I/HMG-Y	1388200	855210	670250	6069200	-	4605000	1028200	2436010
165	Q9Y2B0	CNPY2	Protein canopy homolog 2	3780200	3055000	599300	709480	220990	8110600	509240	2.4264e+06
166	P13489	RNH1	Ribonuclease inhibitor	2463300	679350	2513100	1262000	1586400	7132300	1335000	2.42449e+06
167	P39687	ANP32A	Acidic leucine-rich nuclear phosphoprotein 32 family member A	1698100	319620	1312200	1911700	932390	9056600	1730600	2423030
168	P05388	RPLP0	60S acidic ribosomal protein P0	1947100	702670	1320100	1790000	490980	9998100	605770	2.40782e+06
169	P61769	B2M	Beta-2-microglobulin	2393300	897020	1809100	1527500	64111	3590700	6176200	2351133
170	P02649	APOE	Apolipoprotein E	1241500	796950	824720	8381300	463350	291360	4425300	2.34635e+06
171	P06748	NPM1	Nucleophosmin	3119500	675570	622720	2933300	-	5709500	970760	2.33856e+06
172	E9PAV3	NACA	Nascent polypeptide-associated complex subunit alpha, muscle-specific form	1780100	64572	2340000	364190	2126100	9364600	277470	2.331e+06
173	O76061	STC2	Stanniocalcin-2	3065900	5910400	2400800	1119500	558860	2165900	1046600	2.32399e+06
174	P48307	TFPI2	Tissue factor pathway inhibitor 2	2235800	1492200	1238800	5061000	-	3077900	490930	2266105
175	Q8NC51	SERBP1	Plasminogen activator inhibitor 1 RNA-binding protein	2855100	477630	2267800	1591900	1179300	6633100	799930	2.25782e+06
176	P12829	MYL4	Myosin light chain 4	782380	-	2545400	533850	1055600	6335000	-	2250446
177	P49773	HINT1	Histidine triad nucleotide-binding protein 1	3435500	901220	3181600	-	950190	4594100	306760	2.22823e+06
178	P32119	PRDX2	Peroxiredoxin-2	3201200	4103500	1241600	1350700	560700	4008900	962700	2.20419e+06
179	Q6NZI2	PTRF	Polymerase I and transcript release factor	2464000	243920	2411900	2305900	1692200	4420700	1851100	2.19853e+06
180	P40926	MDH2	Malate dehydrogenase, mitochondrial	3049900	3514400	2176900	1483200	891100	3236600	921840	2.18199e+06
181	P23396	RPS3	40S ribosomal protein S3	1364200	153790	1681600	1020400	1070500	9318400	575020	2169130
182	P35579	MYH9	Myosin-9	2140200	451220	2627600	811110	1900100	6009600	889520	2.11848e+06
183	Q14061	COX17	Cytochrome c oxidase copper chaperone	2602400	709110	1552300	1521400	2212600	4708400	1393000	2.09989e+06
184	Q07020	RPL18	60S ribosomal protein L18	706060	346920	1599300	-	1495200	6314800	-	2092456
185	P61978	HNRNPK	Heterogeneous nuclear ribonucleoprotein K	1925900	683330	2002700	1740200	1431800	6065200	769920	2.08844e+06
186	O43399	TPD52L2	Tumor protein D54	2591200	615010	997720	1836400	1355700	5727100	1269100	2.05603e+06
187	P00568	AK1	Adenylate kinase isoenzyme 1	3581500	-	5937200	219220	149670	1058000	1183200	2021465
188	P07339	CTSD	Cathepsin D	1721700	618210	2519200	738940	1795100	6170000	569450	2.01894e+06
189	P05067	APP	Amyloid beta A4 protein	1888300	809360	1945300	1819800	805820	5367500	1362400	1.99978e+06
190	O14737	PDCD5	Programmed cell death protein 5	1601300	740230	1287300	865980	1621900	7071500	746560	1.99068e+06
191	P40261	NNMT	Nicotinamide N-methyltransferase	1259100	240360	1519700	503990	1362800	7999300	820030	1.9579e+06
192	Q3ZCM7	TUBB8	Tubulin beta-8 chain	1187100	480510	1506100	721310	1641000	6403200	1583000	1.93175e+06
193	P27695	APEX1	DNA-(apurinic or apyrimidinic site) lyase	1008500	489450	2096300	947450	1348600	6623100	964120	1925360
194	Q99536	VAT1	Synaptic vesicle membrane protein VAT-1 homolog	1516600	525240	1317800	2302300	790510	5698100	1248400	1.91414e+06
195	P14550	AKR1A1	Alcohol dehydrogenase [NADP(+)]	1564700	659940	2092900	1022000	1635100	4358300	1988800	1.90311e+06
196	Q07021	C1QBP	Complement component 1 Q subcomponent-binding protein, mitochondrial	2458800	1102200	1191000	2222700	889130	2425700	2962300	1.89312e+06
197	Q92743	HTRA1	Serine protease HTRA1	2244000	1406000	662300	4075400	757090	2487900	1604700	1.89106e+06
198	P50454	SERPINH1	Serpin H1	1893700	645840	1015200	1433600	215080	6192100	1822800	1.88833e+06
199	P61604	HSPE1	10 kDa heat shock protein, mitochondrial	1417700	911760	1967100	2562100	1479100	2299400	2552500	1.88424e+06
200	P00746	CFD	Complement factor D	1134700	1497400	1277400	2023100	-	-	3466300	1879780
201	P12110	COL6A2	Collagen alpha-2(VI) chain	1145800	1952400	1422000	4706800	75445	1503700	2151800	1851135
202	P12814	ACTN1	Alpha-actinin-1	1202600	267040	2155400	1050700	1114300	6416100	641840	1.83543e+06
203	P62424	RPL7A	60S ribosomal protein L7a	825220	229240	1176300	404270	1325200	8561400	233550	1.82217e+06
204	P09651	HNRNPA1	Heterogeneous nuclear ribonucleoprotein A1	1283600	180840	1805600	1462600	217470	7231000	534950	1816580
205	P62826	RAN	GTP-binding nuclear protein Ran	1408700	414570	1716800	1101200	920470	6433400	661980	1808160
206	O60664	PLIN3	Perilipin-3	1438500	399780	1935300	2104000	959920	5488700	290210	1.80234e+06
207	P34932	HSPA4	Heat shock 70 kDa protein 4	2011900	594830	2371600	856570	1482200	4496200	800910	1802030
208	Q8NBS9	TXNDC5	Thioredoxin domain-containing protein 5	2119300	1363100	1128700	1587800	310400	2931500	2951200	1.77029e+06
209	Q96CG8	CTHRC1	Collagen triple helix repeat-containing protein 1	460470	304900	1878900	4350400	112660	2202100	3068900	1.76833e+06
210	P22692	IGFBP4	Insulin-like growth factor-binding protein 4	1474900	1517900	1092300	5060300	769480	1006900	1388500	1.75861e+06
211	Q02818	NUCB1	Nucleobindin-1	647220	2434300	414020	2692100	306270	2077900	3736000	1.75826e+06
212	Q9BUD6	SPON2	Spondin-2	1178700	411980	412750	2552000	-	-	4209300	1752946
213	P62854	RPS26	40S ribosomal protein S26	1456500	-	888940	504660	716590	5176300	-	1748598
214	P15121	AKR1B1	Aldose reductase	2099000	1526400	1070600	1536000	931880	2632700	2297500	1.72773e+06
215	P24534	EEF1B2	Elongation factor 1-beta	1243500	473510	966110	973210	1245100	6386800	453130	1.67734e+06
216	P61088	UBE2N	Ubiquitin-conjugating enzyme E2 N	883990	208440	1490800	813470	716800	7055400	448460	1.65962e+06
217	Q9BUF5	TUBB6	Tubulin beta-6 chain	1703600	463160	1588300	501500	1488000	5614200	235280	1.65629e+06
218	P50395	GDI2	Rab GDP dissociation inhibitor beta	1590300	542480	1695000	909350	819230	4256100	1707300	1645680
219	P30085	CMPK1	UMP-CMP kinase	1527900	532470	1959400	728880	1173500	4353800	1180900	1.63669e+06
220	Q08629	SPOCK1	Testican-1	1626100	1780700	870140	3858000	201220	823450	2245400	1.62929e+06
221	P60660	MYL6	Myosin light polypeptide 6	1187900	426790	3607300	1333500	647760	3347300	825830	1.6252e+06
222	P19338	NCL	Nucleolin	1585400	181140	681110	1535100	370100	6836400	169330	1.62265e+06
223	Q16555	DPYSL2	Dihydropyrimidinase-related protein 2	1877100	766530	2361800	1567900	792800	3067200	909820	1620450
224	Q9Y4Y9	LSM5	U6 snRNA-associated Sm-like protein LSm5	1042400	-	1272700	1354200	874480	4127900	1008000	1613280
225	Q01469	FABP5	Fatty acid-binding protein, epidermal	2638500	757810	2306400	1639400	328090	2769300	798620	1.60545e+06
226	Q7Z7G0	ABI3BP	Target of Nesh-SH3	2374400	1177500	818400	970600	179380	1438100	4222800	1.59731e+06
227	P60903	S100A10	Protein S100-A10	2759500	805300	1190700	1256600	1224700	2790100	1098800	1.58939e+06
228	P02511	CRYAB	Alpha-crystallin B chain	2370900	618050	596240	111710	3668500	3440700	305060	1.58731e+06
229	P35555	FBN1	Fibrillin-1	1431200	2732100	929450	2152900	88453	1455700	2321300	1.5873e+06
230	P09936	UCHL1	Ubiquitin carboxyl-terminal hydrolase isozyme L1	1339500	769260	2227500	476220	460900	4495000	1308900	1.58247e+06
231	Q16082	HSPB2	Heat shock protein beta-2	760310	-	1312100	329700	1108800	5393200	574710	1.5798e+06
232	P55209	NAP1L1	Nucleosome assembly protein 1-like 1	3074600	445310	357280	1166000	1484600	2839000	-	1.56113e+06
233	P05155	SERPING1	Plasma protease C1 inhibitor	1071500	1816600	500400	4066100	235040	430830	2781000	1.55735e+06
234	Q13561	DCTN2	Dynactin subunit 2	1122500	-	1314900	548620	891740	5228600	172370	1546455
235	O00244	ATOX1	Copper transport protein ATOX1	-	591680	1370500	3390800	792010	1542000	-	1537398
236	Q16543	CDC37	Hsp90 co-chaperone Cdc37	1219500	179130	1669600	1390000	-	4545000	169970	1.52887e+06
237	P62263	RPS14	40S ribosomal protein S14	1064100	-	770370	964750	567610	4257900	-	1524946
238	P08708	RPS17	40S ribosomal protein S17	561200	-	1342100	487870	528150	4665000	-	1516864
239	P68036	UBE2L3	Ubiquitin-conjugating enzyme E2 L3	4543100	321370	2211000	898030	1230000	521220	871090	1.51369e+06
240	P80297	MT1X	Metallothionein-1X	1291700	701830	1513400	-	2269700	1729100	1562800	1.51142e+06
241	Q6ZMU5	TRIM72	Tripartite motif-containing protein 72	534490	-	400020	123440	482380	5993900	-	1506846
242	Q96FQ6	S100A16	Protein S100-A16	1858500	319400	1950400	1088100	488090	4334500	491950	1504420
243	P07093	SERPINE2	Glia-derived nexin	2339900	2772200	1653600	1251800	78076	893570	1522200	1.50162e+06
244	P07942	LAMB1	Laminin subunit beta-1	1151400	1476400	700030	3732200	110270	854480	2449500	1.49633e+06
245	Q13361	MFAP5	Microfibrillar-associated protein 5	2523500	999100	1371600	919790	619550	2704400	1315800	1.49339e+06
246	P40925	MDH1	Malate dehydrogenase, cytoplasmic	877170	437100	1422300	542740	2193200	3222300	1689300	1.48344e+06
247	Q13442	PDAP1	28 kDa heat- and acid-stable phosphoprotein	1778500	216830	1775300	364430	957210	4611200	553250	1.46525e+06
248	P21333	FLNA	Filamin-A	1270000	426050	1778300	1465600	1068200	3367300	763810	1.44847e+06
249	P13929	ENO3	Beta-enolase	2395600	215790	872620	318920	2058300	4182900	86939	1.4473e+06
250	Q9NZZ3	CHMP5	Charged multivesicular body protein 5	1371500	-	1222000	800580	891780	3572500	799760	1443020
251	P35052	GPC1	Glypican-1	1544100	476510	1719700	854720	1513500	3712700	274140	1.4422e+06
252	P48741	HSPA7	Putative heat shock 70 kDa protein 7	643700	601240	2031300	292960	649550	4430900	-	1.44161e+06
253	Q9H3K6	BOLA2	BolA-like protein 2	962470	-	2868100	864580	1421900	2143800	367280	1.43802e+06
254	P56537	EIF6	Eukaryotic translation initiation factor 6	437410	227890	1236200	1623700	287090	5825000	404450	1.43453e+06
255	P08865	RPSA	40S ribosomal protein SA	1105000	315890	1212900	687920	1932500	4342300	443420	1.43428e+06
256	P09972	ALDOC	Fructose-bisphosphate aldolase C	1108300	418340	1473700	841990	966250	4252800	971660	1.43329e+06
257	O75396	SEC22B	Vesicle-trafficking protein SEC22b	662460	370020	1461000	2518500	490890	2930500	-	1.40556e+06
258	Q15942	ZYX	Zyxin	1827500	309360	321850	1348100	418430	4589000	898810	1.38758e+06
259	Q9BRA2	TXNDC17	Thioredoxin domain-containing protein 17	661960	-	1554800	444890	1208400	3596700	856470	1.3872e+06
260	P16989	YBX3	Y-box-binding protein 3	1478700	210040	1289500	796740	912740	4586800	405230	1.38282e+06
261	P30048	PRDX3	Thioredoxin-dependent peroxide reductase, mitochondrial	1783700	857520	1065100	2141800	676260	2084300	1061100	1.3814e+06
262	Q16610	ECM1	Extracellular matrix protein 1	2142200	426880	493150	1885000	1176800	2860900	582220	1.36674e+06
263	Q9NWV4	C1orf123	UPF0587 protein C1orf123	2645500	555630	1691400	338840	866620	2674200	722280	1.35635e+06
264	O43583	DENR	Density-regulated protein	1011700	700260	1500300	1391700	-	2086300	1442900	1.35553e+06
265	P63167	DYNLL1	Dynein light chain 1, cytoplasmic	1225500	-	344540	594740	472090	4126900	-	1352754
266	P59998	ARPC4	Actin-related protein 2/3 complex subunit 4	2352100	976340	1612200	1263600	801490	-	1036000	1.34029e+06
267	Q9Y5S9	RBM8A	RNA-binding protein 8A	701020	-	999340	732290	556160	3650300	-	1327822
268	P78417	GSTO1	Glutathione S-transferase omega-1	1068400	178990	2485400	711530	1135300	2989200	724760	1.32765e+06
269	Q9UBX5	FBLN5	Fibulin-5	1488500	851250	1524400	1429900	-	1354000	1251100	1316525
270	O76076	WISP2	WNT1-inducible-signaling pathway protein 2	440140	1541700	300900	1968400	-	-	2288200	1307868
271	P35268	RPL22	60S ribosomal protein L22	1410100	577060	967770	1278900	1282800	2400300	1102100	1.28843e+06
272	P13639	EEF2	Elongation factor 2	761660	875490	746470	670440	468520	4737100	756490	1.28802e+06
273	Q96C90	PPP1R14B	Protein phosphatase 1 regulatory subunit 14B	772410	1183500	881760	340630	940010	3074900	1777400	1.28152e+06
274	P62913	RPL11	60S ribosomal protein L11	828570	197390	1359100	1011800	357810	3933700	-	1281395
275	P05997	COL5A2	Collagen alpha-2(V) chain	971620	1359800	589510	1081000	15170	1832400	3098800	1.27833e+06
276	Q99439	CNN2	Calponin-2	1629800	506600	824730	817730	1037100	2849800	-	1.27763e+06
277	Q9H4D0	CLSTN2	Calsyntenin-2	251100	27452	704660	292660	828740	5560000	-	1.27744e+06
278	P63241	EIF5A	Eukaryotic translation initiation factor 5A-1	577450	293900	1030800	1443900	429320	4035800	1115200	1.2752e+06
279	P26641	EEF1G	Elongation factor 1-gamma	1365400	334080	910250	603560	585690	4400900	676160	1.26801e+06
280	O60565	GREM1	Gremlin-1	1710400	177520	111010	1865600	532630	3165400	-	1.26043e+06
281	P41271	NBL1	Neuroblastoma suppressor of tumorigenicity 1	1452300	2122400	645350	2340800	-	364620	631290	1259460
282	P04732	MT1E	Metallothionein-1E	1671900	-	880330	704260	822390	1596100	1822300	1.24955e+06
283	P52907	CAPZA1	F-actin-capping protein subunit alpha-1	1437100	196920	1212800	229240	522990	4040000	1038900	1.23971e+06
284	P04080	CSTB	Cystatin-B	1075700	348160	2789300	555970	593610	2662200	548500	1.22478e+06
285	P46777	RPL5	60S ribosomal protein L5	559060	123900	1493100	442780	294570	5201600	425050	1.22001e+06
286	P52943	CRIP2	Cysteine-rich protein 2	1122300	150710	2608000	650270	2235200	513540	-	1.21334e+06
287	P05452	CLEC3B	Tetranectin	1992500	724510	157430	2937700	-	204690	1246800	1210605
288	P07711	CTSL	Cathepsin L1	1765200	882620	458800	1160500	200550	-	2782100	1208295
289	P15531	NME1	Nucleoside diphosphate kinase A	1369800	210790	459720	81844	-	4526000	591230	1206564
290	Q07955	SRSF1	Serine/arginine-rich splicing factor 1	794260	527650	-	866560	-	3449400	394200	1206414
291	P63165	SUMO1	Small ubiquitin-related modifier 1	1405000	593280	1294500	342520	800530	3244200	635030	1.18787e+06
292	P62805	HIST1H4A	Histone H4	715140	123950	-	1088800	96455	4283700	818670	1.18779e+06
293	Q16363	LAMA4	Laminin subunit alpha-4	571540	1261200	322940	3238300	51534	68783	2792700	1.18671e+06
294	P18669	PGAM1	Phosphoglycerate mutase 1	1331500	371940	1608000	302310	798100	3617300	270530	1.18567e+06
295	P31431	SDC4	Syndecan-4	2559600	154720	1670700	1979900	565380	922430	423590	1.18233e+06
296	P60033	CD81	CD81 antigen	969240	780480	980180	850100	1129000	2038600	1528600	1.18231e+06
297	Q15084	PDIA6	Protein disulfide-isomerase A6	1422900	459620	1156400	1542500	480020	2489100	700050	1.17866e+06
298	P61163	ACTR1A	Alpha-centractin	1065200	330490	831360	737370	694980	4127000	407430	1.17055e+06
299	Q9UBR2	CTSZ	Cathepsin Z	661070	617640	1919200	1088000	1650000	1298900	938890	1.16767e+06
300	Q9Y696	CLIC4	Chloride intracellular channel protein 4	290280	571520	598710	163050	463310	5871600	202280	1.16582e+06
301	P84157	MXRA7	Matrix-remodeling-associated protein 7	1692200	492490	1472400	599310	1286100	2021900	398600	1.13757e+06
302	Q04446	GBE1	1,4-alpha-glucan-branching enzyme	1974100	826300	944990	720970	463450	2150500	856500	1133830
303	P00488	F13A1	Coagulation factor XIII A chain	58267	-	222890	41526	480460	4861400	-	1.13291e+06
304	Q13203	MYBPH	Myosin-binding protein H	520820	-	916400	132210	1122700	2833900	-	1105206
305	P47755	CAPZA2	F-actin-capping protein subunit alpha-2	865070	1050200	794020	194430	495500	4052300	284500	1.10515e+06
306	P30040	ERP29	Endoplasmic reticulum resident protein 29	993710	681690	1073700	1503700	571670	1883500	1005600	1.10194e+06
307	P11055	MYH3	Myosin-3	743780	10409	1113200	215860	772900	4771900	48871	1.0967e+06
308	Q9UKY7	CDV3	Protein CDV3 homolog	428780	673220	1241300	133690	126280	4775800	237510	1.08808e+06
309	Q9P2E9	RRBP1	Ribosome-binding protein 1	1315400	678850	617200	1838400	201090	1751100	1132700	1.07639e+06
310	P14324	FDPS	Farnesyl pyrophosphate synthase	293430	187840	1532700	764470	570260	3815800	361220	1.0751e+06
311	P17936	IGFBP3	Insulin-like growth factor-binding protein 3	745570	355860	1644600	592780	406260	3374600	346430	1.06659e+06
312	Q8NI22	MCFD2	Multiple coagulation factor deficiency protein 2	525360	3368000	569410	777940	192230	1031500	983670	1.06402e+06
313	P18206	VCL	Vinculin	881110	224090	1572900	821350	541450	2969000	423870	1.06197e+06
314	Q16186	ADRM1	Proteasomal ubiquitin receptor ADRM1	1011600	-	772880	697860	521100	3075400	241910	1.05346e+06
315	Q15121	PEA15	Astrocytic phosphoprotein PEA-15	861880	-	795040	399910	618280	3257600	371520	1050705
316	P07996	THBS1	Thrombospondin-1	703090	390260	1685200	532950	505830	3220600	299820	1048250
317	Q04917	YWHAH	14-3-3 protein eta	1550000	-	1135400	265910	101120	3063400	167740	1.04726e+06
318	P35080	PFN2	Profilin-2	605450	-	1213600	880610	657540	2504500	411480	1045530
319	P18621	RPL17	60S ribosomal protein L17	2499300	-	1329400	219830	644310	515580	-	1041684
320	Q9UBI6	GNG12	Guanine nucleotide-binding protein G(I)/G(S)/G(O) subunit gamma-12	986230	290660	1524900	1554800	929540	1241500	751100	1.03982e+06
321	P01344	IGF2	Insulin-like growth factor II	716740	235180	906570	-	1037900	2251000	-	1029478
322	Q9UBP4	DKK3	Dickkopf-related protein 3	359080	366740	1399300	450740	146900	4169300	275980	1.02401e+06
323	P12111	COL6A3	Collagen alpha-3(VI) chain	600470	902620	430290	2865200	4830.6	1157500	1118800	1.01139e+06
324	P29401	TKT	Transketolase	824950	446060	892430	1185500	340900	1916000	1412100	1.00256e+06
325	P07437	TUBB	Tubulin beta chain	482090	151500	1237700	224060	813140	3746400	357020	1.0017e+06
326	Q15404	RSU1	Ras suppressor protein 1	646560	119680	1123800	1489500	285290	2986900	335510	998177
327	O75822	EIF3J	Eukaryotic translation initiation factor 3 subunit J	804770	225410	1059800	889420	544890	2564300	842380	990139
328	Q13813	SPTAN1	Spectrin alpha chain, non-erythrocytic 1	931720	166430	825970	398920	971050	3310000	309780	987696
329	O94985	CLSTN1	Calsyntenin-1	1297800	1261800	169680	539110	132720	749930	2754100	986449
330	P61160	ACTR2	Actin-related protein 2	999090	-	665700	322230	223020	2656500	-	973308
331	P62280	RPS11	40S ribosomal protein S11	581100	449890	257390	241110	898540	3398800	-	971138
332	Q9BRK5	SDF4	45 kDa calcium-binding protein	987640	589760	633480	1546300	104390	737500	2178300	968196
333	P10619	CTSA	Lysosomal protective protein	227380	493950	1353700	1411000	835440	1397100	1045100	966239
334	P00167	CYB5A	Cytochrome b5	883030	775840	645580	1713300	-	762360	986090	961033
335	P09341	CXCL1	Growth-regulated alpha protein	27648	500580	32671	-	-	620610	3567800	949862
336	O43504	LAMTOR5	Ragulator complex protein LAMTOR5	-	-	722750	732910	618020	2284900	350460	941808
337	Q13409	DYNC1I2	Cytoplasmic dynein 1 intermediate chain 2	726580	255970	816520	169390	915670	3109400	482280	925116
338	Q14257	RCN2	Reticulocalbin-2	717640	630400	1567600	911410	1047800	437670	1150700	923317
339	P47813	EIF1AX	Eukaryotic translation initiation factor 1A, X-chromosomal	558060	-	731100	456520	366190	2502700	-	922914
340	P47756	CAPZB	F-actin-capping protein subunit beta	758110	188440	992080	713120	318990	3251200	207410	918479
341	Q96QR8	PURB	Transcriptional activator protein Pur-beta	473780	-	289830	138710	103770	4320800	182250	918190
342	Q01082	SPTBN1	Spectrin beta chain, non-erythrocytic 1	969000	115750	949380	422790	648760	2907300	400410	916199
343	Q13404	UBE2V1	Ubiquitin-conjugating enzyme E2 variant 1	936370	110900	1045600	304380	340630	2645400	-	897213
344	O00469	PLOD2	Procollagen-lysine,2-oxoglutarate 5-dioxygenase 2	421160	954740	1058100	858350	198540	1816500	915630	889003
345	Q13185	CBX3	Chromobox protein homolog 3	865380	310590	293100	492450	372140	3434200	422940	884400
346	Q9NP97	DYNLRB1	Dynein light chain roadblock-type 1	-	285330	566770	590420	404030	2540300	-	877370
347	P51858	HDGF	Hepatoma-derived growth factor	896990	330800	1045600	643360	641210	2084800	487190	875707
348	Q14240	EIF4A2	Eukaryotic initiation factor 4A-II	683470	91529	876250	456350	323970	3430300	228800	870096
349	P63208	SKP1	S-phase kinase-associated protein 1	946170	-	464980	395440	153250	2990300	263570	868952
350	P43487	RANBP1	Ran-specific GTPase-activating protein	776060	-	840830	626980	593510	1874400	499410	868532
351	P09417	QDPR	Dihydropteridine reductase	970700	586160	878870	526780	541850	1467900	1051000	860466
352	Q00688	FKBP3	Peptidyl-prolyl cis-trans isomerase FKBP3	481980	-	1004000	-	216870	2249900	349080	860366
353	Q01518	CAP1	Adenylyl cyclase-associated protein 1	653770	112040	1206700	407110	778770	2678600	133950	852991
354	O00499	BIN1	Myc box-dependent-interacting protein 1	2155300	137250	383690	431990	137620	2498200	221850	852271
355	Q93045	STMN2	Stathmin-2	135910	-	1126100	76737	178870	3496500	95814	851655
356	P21291	CSRP1	Cysteine and glycine-rich protein 1	304670	-	1537200	678800	683230	1053300	-	851440
357	P42574	CASP3	Caspase-3	668810	-	817160	112580	402250	2874100	149170	837345
358	Q09666	AHNAK	Neuroblast differentiation-associated protein AHNAK	734850	166550	904560	1082100	545780	2179600	220840	833469
359	Q16643	DBN1	Drebrin	555970	284200	653690	285710	569640	3108600	373030	832977
360	P30044	PRDX5	Peroxiredoxin-5, mitochondrial	161120	-	514550	714670	117040	2788200	673430	828168
361	O75347	TBCA	Tubulin-specific chaperone A	1731200	435160	191460	930470	492440	1585500	423320	827079
362	P13591	NCAM1	Neural cell adhesion molecule 1	285160	110470	1473500	158530	1063100	2652000	19360	823160
363	P61960	UFM1	Ubiquitin-fold modifier 1	724180	256850	1085200	698560	634650	1385300	-	797457
364	Q9NVA2	SEP11	Septin-11	966690	106810	658280	621720	702410	2141600	379370	796697
365	O95865	DDAH2	N(G),N(G)-dimethylarginine dimethylaminohydrolase 2	616300	176850	576270	347450	1143900	2221300	446590	789809
366	O75531	BANF1	Barrier-to-autointegration factor	848160	243380	771030	822950	901590	1055900	869360	787481
367	P29279	CTGF	Connective tissue growth factor	1461500	33937	979430	25530	540590	2192900	211620	777930
368	P28799	GRN	Granulins	808880	864900	794150	1170300	61291	1191500	466690	765387
369	P23327	HRC	Sarcoplasmic reticulum histidine-rich calcium-binding protein	125740	-	473250	202130	349850	2666300	-	763454
370	P35030	PRSS3	Trypsin-3	228040	-	556010	321650	803970	1744300	888120	757015
371	O14558	HSPB6	Heat shock protein beta-6	1715400	138070	391650	547240	319850	1407600	-	753302
372	Q96CX2	KCTD12	BTB/POZ domain-containing protein KCTD12	597830	109110	923680	-	367780	1758100	-	751300
373	O75223	GGCT	Gamma-glutamylcyclotransferase	510090	-	894870	535880	234080	2082300	229950	747862
374	P14209	CD99	CD99 antigen	497740	284760	336890	892960	570170	2025500	588720	742391
375	P39023	RPL3	60S ribosomal protein L3	263680	199290	282120	-	388250	2577200	-	742108
376	Q14011	CIRBP	Cold-inducible RNA-binding protein	487230	206080	762840	352870	525530	2099700	-	739042
377	P40429	RPL13A	60S ribosomal protein L13a	553650	-	494820	173990	292990	2164200	-	735930
378	P68402	PAFAH1B2	Platelet-activating factor acetylhydrolase IB subunit beta	375470	-	341170	-	1472800	1171700	308860	734000
379	P21926	CD9	CD9 antigen	1003100	1391600	471540	335200	458560	-	-	732000
380	P55735	SEC13	Protein SEC13 homolog	1011100	315930	740350	518670	214060	2156800	157230	730591
381	Q9Y4K0	LOXL2	Lysyl oxidase homolog 2	564910	150530	485200	401890	134030	1356900	2013000	729494
382	Q9NYJ1	COA4	Cytochrome c oxidase assembly factor 4 homolog, mitochondrial	709070	-	663130	542690	827230	905300	-	729484
383	Q01844	EWSR1	RNA-binding protein EWS	617350	252920	547570	665940	416580	1841200	-	723593
384	Q14393	GAS6	Growth arrest-specific protein 6	1176400	529350	277940	1533600	44788	665620	826020	721960
385	P01019	AGT	Angiotensinogen	118230	-	-	2332300	267220	263630	608650	718006
386	P78559	MAP1A	Microtubule-associated protein 1A	581460	54018	845150	237530	465970	2659000	178170	717328
387	P62820	RAB1A	Ras-related protein Rab-1A	641150	341120	606770	653030	239060	1802500	-	713938
388	O43493	TGOLN2	Trans-Golgi network integral membrane protein 2	231230	151390	773580	869750	135000	1586900	1237800	712236
389	O15400	STX7	Syntaxin-7	671520	402840	940610	629760	450560	1713200	134260	706107
390	Q53FA7	TP53I3	Quinone oxidoreductase PIG3	589240	379520	757770	-	236650	1566400	-	705916
391	Q9Y265	RUVBL1	RuvB-like 1	701810	236420	421740	-	250990	1911200	-	704432
392	P26885	FKBP2	Peptidyl-prolyl cis-trans isomerase FKBP2	265200	820950	299710	1395900	636480	435140	1042200	699369
393	P20290	BTF3	Transcription factor BTF3	581140	-	417530	-	379730	1774800	336080	697856
394	P09429	HMGB1	High mobility group protein B1	-	1343700	251240	740110	183810	1315200	352480	697757
395	P62701	RPS4X	40S ribosomal protein S4, X isoform	472190	-	418070	147870	268000	2173500	-	695926
396	Q15691	MAPRE1	Microtubule-associated protein RP/EB family member 1	1269400	640600	973190	103350	235890	516370	1127600	695200
397	O95967	EFEMP2	EGF-containing fibulin-like extracellular matrix protein 2	869110	585650	296790	1691200	60443	673200	656250	690378
398	P49747	COMP	Cartilage oligomeric matrix protein	1065100	-	950840	864710	23863	1140900	96412	690304
399	Q6EMK4	VASN	Vasorin	661660	501200	275870	617830	80302	451460	2239100	689632
400	P43235	CTSK	Cathepsin K	903140	1131600	160750	232800	-	-	1009300	687518
401	P10646	TFPI	Tissue factor pathway inhibitor	1238700	-	485700	228850	203210	613780	1345200	685907
402	P23381	WARS	Tryptophan--tRNA ligase, cytoplasmic	208330	144030	548590	292150	288320	2909900	401110	684633
403	P21810	BGN	Biglycan	252940	102600	251270	2093800	225070	1409800	446370	683121
404	P12883	MYH7	Myosin-7	381090	11650	1175200	5547.8	1074600	2054100	47573	678537
405	P15586	GNS	N-acetylglucosamine-6-sulfatase	485810	-	529120	250170	454730	521610	1819100	676757
406	P78371	CCT2	T-complex protein 1 subunit beta	979110	98660	629980	414880	332390	2179900	91382	675186
407	Q14192	FHL2	Four and a half LIM domains protein 2	148580	-	840820	229750	199850	1900200	-	663840
408	P62851	RPS25	40S ribosomal protein S25	631340	-	705000	-	420400	1480300	69512	661310
409	P51114	FXR1	Fragile X mental retardation syndrome-related protein 1	156410	-	504670	95980	370600	2178100	-	661152
410	P46821	MAP1B	Microtubule-associated protein 1B	588410	353370	524890	716240	253030	1907400	281290	660661
411	O60506	SYNCRIP	Heterogeneous nuclear ribonucleoprotein Q	785080	181920	377990	112160	466480	2381900	298800	657761
412	P19105	MYL12A	Myosin regulatory light chain 12A	497940	-	1075700	374480	566330	1177000	226800	653042
413	Q9BQE3	TUBA1C	Tubulin alpha-1C chain	877000	204760	627590	261840	127610	1813300	-	652017
414	P20908	COL5A1	Collagen alpha-1(V) chain	262810	864910	587060	1046600	39863	586190	1168400	650833
415	O43237	DYNC1LI2	Cytoplasmic dynein 1 light intermediate chain 2	530560	92551	906290	253450	724950	1848900	192140	649834
416	Q9NY33	DPP3	Dipeptidyl peptidase 3	499750	135500	659180	188960	766490	1962700	323100	647954
417	P09603	CSF1	Macrophage colony-stimulating factor 1	860850	1199000	399190	886570	76155	139710	936300	642539
418	Q96AY3	FKBP10	Peptidyl-prolyl cis-trans isomerase FKBP10	281530	508910	648860	1129100	123330	1226000	564910	640377
419	O95881	TXNDC12	Thioredoxin domain-containing protein 12	1890400	898680	-	600870	89850	207610	124680	635348
420	P28066	PSMA5	Proteasome subunit alpha type-5	640580	-	227780	141510	748030	1415900	-	634760
421	P52926	HMGA2	High mobility group protein HMGI-C	459530	1635300	297350	298660	256760	620550	860580	632676
422	P35442	THBS2	Thrombospondin-2	514200	490160	157250	1457600	-	270910	874580	627450
423	Q9H2H8	PPIL3	Peptidyl-prolyl cis-trans isomerase-like 3	422810	-	486620	206250	336520	1019900	1257300	621567
424	Q99471	PFDN5	Prefoldin subunit 5	374580	-	505100	183780	110150	2410200	117410	616870
425	P20810	CAST	Calpastatin	421770	320780	290540	464860	760830	1190500	858260	615363
426	O15511	ARPC5	Actin-related protein 2/3 complex subunit 5	603560	-	595010	748110	150410	1237300	324820	609868
427	P06744	GPI	Glucose-6-phosphate isomerase	908330	266540	640810	113150	752240	1068300	469270	602663
428	P30405	PPIF	Peptidyl-prolyl cis-trans isomerase F, mitochondrial	810690	427330	-	436010	-	737940	578220	598038
429	Q96FW1	OTUB1	Ubiquitin thioesterase OTUB1	499050	186400	653600	364830	326140	1771000	385190	598030
430	P61158	ACTR3	Actin-related protein 3	501550	134510	347360	414990	165570	2299200	271450	590661
431	P68133	ACTA1	Actin, alpha skeletal muscle	757690	-	409350	138810	156960	1489600	-	590482
432	P18065	IGFBP2	Insulin-like growth factor-binding protein 2	-	484730	1191700	-	256030	916540	91192	588038
433	P45379	TNNT2	Troponin T, cardiac muscle	377650	-	398090	242860	217290	1685600	-	584298
434	O43396	TXNL1	Thioredoxin-like protein 1	-	-	273510	156760	1142900	568390	773440	583000
435	P63244	GNB2L1	Guanine nucleotide-binding protein subunit beta-2-like 1	675690	120900	808520	454990	300670	1576600	142240	582801
436	Q09028	RBBP4	Histone-binding protein RBBP4	310290	287850	572400	406670	377210	1673400	426780	579229
437	Q9UBY9	HSPB7	Heat shock protein beta-7	684040	-	498370	-	190010	937270	-	577422
438	O14498	ISLR	Immunoglobulin superfamily containing leucine-rich repeat protein	734750	303320	-	1319600	55818	686830	356910	576205
439	O95810	SDPR	Serum deprivation-response protein	740120	56778	1083700	159450	1179800	516790	258640	570754
440	Q14247	CTTN	Src substrate cortactin	375000	128070	642000	396870	346360	1689300	406110	569101
441	Q13263	TRIM28	Transcription intermediary factor 1-beta	357320	-	422000	357870	338860	1652600	264570	565537
442	Q15369	TCEB1	Transcription elongation factor B polypeptide 1	211030	-	502940	299020	-	1630700	164040	561546
443	Q15417	CNN3	Calponin-3	147230	-	636040	79221	805840	1449800	191460	551598
444	Q13162	PRDX4	Peroxiredoxin-4	322370	395860	440330	1164400	322070	745080	456510	549517
445	Q9UQ80	PA2G4	Proliferation-associated protein 2G4	265460	-	246640	91801	115710	2002900	-	544502
446	Q06323	PSME1	Proteasome activator complex subunit 1	1068300	410030	219720	179180	610780	1105000	186840	539979
447	O95747	OXSR1	Serine/threonine-protein kinase OSR1	365020	-	661280	43171	285310	1331400	-	537236
448	Q86UP2	KTN1	Kinectin	556040	180480	880300	270310	246180	1483900	87752	529280
449	Q9NQ30	ESM1	Endothelial cell-specific molecule 1	1492200	452290	-	158030	-	346300	195780	528920
450	P55795	HNRNPH2	Heterogeneous nuclear ribonucleoprotein H2	527270	171940	509100	308780	306900	1327000	-	525165
451	P42330	AKR1C3	Aldo-keto reductase family 1 member C3	503980	521330	409570	663970	295310	595170	679560	524127
452	P22314	UBA1	Ubiquitin-like modifier-activating enzyme 1	483450	57284	466350	287820	258950	2032400	80996	523893
453	P62140	PPP1CB	Serine/threonine-protein phosphatase PP1-beta catalytic subunit	536810	-	324740	355750	355160	1360700	200600	522293
454	Q00577	PURA	Transcriptional activator protein Pur-alpha	662720	333480	297140	454170	292420	1074700	-	519105
455	Q92520	FAM3C	Protein FAM3C	1013300	137020	558060	176310	490090	729780	-	517427
456	P41091	EIF2S3	Eukaryotic translation initiation factor 2 subunit 3	368820	62101	399910	335510	254070	2044000	127070	513069
457	O00231	PSMD11	26S proteasome non-ATPase regulatory subunit 11	520300	195590	364990	432320	259160	1505300	299380	511006
458	P63279	UBE2I	SUMO-conjugating enzyme UBC9	-	463960	585730	752990	98354	775750	362430	506536
459	Q13630	TSTA3	GDP-L-fucose synthase	-	272700	503220	281830	360170	1219200	383660	503463
460	P23526	AHCY	Adenosylhomocysteinase	113060	115140	139340	49781	170670	2429900	-	502982
461	P28838	LAP3	Cytosol aminopeptidase	711690	181480	727740	267780	277360	1054500	270240	498684
462	P54578	USP14	Ubiquitin carboxyl-terminal hydrolase 14	425650	-	396440	189340	71443	1377200	-	492015
463	P04179	SOD2	Superoxide dismutase [Mn], mitochondrial	804280	635080	132740	197660	-	439480	740600	491640
464	Q9BRP8	WIBG	Partner of Y14 and mago	478230	128750	544230	342000	176770	1369000	395810	490684
465	O94760	DDAH1	N(G),N(G)-dimethylarginine dimethylaminohydrolase 1	260220	266800	781100	464890	453500	779810	427890	490601
466	P06737	PYGL	Glycogen phosphorylase, liver form	485880	35417	738770	301960	229950	1314500	315930	488915
467	O15143	ARPC1B	Actin-related protein 2/3 complex subunit 1B	475320	226760	498370	744510	166530	1008000	288820	486901
468	P15621	ZNF44	Zinc finger protein 44	485330	163610	226270	298990	126040	2027300	80638	486883
469	O95817	BAG3	BAG family molecular chaperone regulator 3	512920	57590	487320	118260	520210	1592700	114000	486143
470	Q96KP4	CNDP2	Cytosolic non-specific dipeptidase	449000	251770	121730	172380	1184000	1101900	120610	485913
471	Q9NUQ9	FAM49B	Protein FAM49B	143720	228560	777700	213660	621600	1214800	175070	482159
472	P51665	PSMD7	26S proteasome non-ATPase regulatory subunit 7	622010	-	352630	386180	425220	908040	179020	478850
473	Q9HCU0	CD248	Endosialin	146960	238110	109250	114400	-	192110	2036300	472855
474	Q16851	UGP2	UTP--glucose-1-phosphate uridylyltransferase	289350	-	310350	-	53290	1627000	78268	471652
475	Q96IU4	ABHD14B	Alpha/beta hydrolase domain-containing protein 14B	527410	181040	563830	-	231920	1050100	267000	470217
476	Q9UDY4	DNAJB4	DnaJ homolog subfamily B member 4	332370	-	381850	61288	90233	1824700	115350	467632
477	O00410	IPO5	Importin-5	152650	-	378180	189730	160830	1449900	-	466258
478	Q04828	AKR1C1	Aldo-keto reductase family 1 member C1	661680	202030	82289	599020	181280	249670	1285000	465853
479	Q15149	PLEC	Plectin	351810	83977	669070	311370	329750	1388500	117740	464602
480	Q12904	AIMP1	Aminoacyl tRNA synthase complex-interacting multifunctional protein 1	639850	-	137750	142730	635330	766870	-	464506
481	P25786	PSMA1	Proteasome subunit alpha type-1	604100	53067	474910	266650	460710	969680	394020	460448
482	P30153	PPP2R1A	Serine/threonine-protein phosphatase 2A 65 kDa regulatory subunit A alpha isoform	119880	44118	217250	70373	660720	1342400	760630	459339
483	P00491	PNP	Purine nucleoside phosphorylase	494290	370750	464830	330230	222030	879700	451290	459017
484	Q8NBJ4	GOLM1	Golgi membrane protein 1	543610	141060	242750	951160	156040	575030	574300	454850
485	Q02952	AKAP12	A-kinase anchor protein 12	862360	504100	251950	486240	68124	710190	255130	448299
486	O60687	SRPX2	Sushi repeat-containing protein SRPX2	697320	326060	187260	600630	85885	1034000	205470	448089
487	P35637	FUS	RNA-binding protein FUS	490310	-	295960	362210	217430	845980	453730	444270
488	P55291	CDH15	Cadherin-15	754330	-	455100	59403	496760	809960	72056	441268
489	P01893	HLA-H	Putative HLA class I histocompatibility antigen, alpha chain H	426300	276640	303770	482910	204490	793850	598510	440924
490	O95633	FSTL3	Follistatin-related protein 3	195150	344750	452800	472200	159570	926430	526300	439600
491	P46926	GNPDA1	Glucosamine-6-phosphate isomerase 1	608710	271250	852100	597430	40908	537720	149620	436820
492	P62873	GNB1	Guanine nucleotide-binding protein G(I)/G(S)/G(T) subunit beta-1	-	287140	520580	301170	286910	772780	-	433716
493	Q9UHD8	SEPT9	Septin-9	209960	81751	473520	197080	502910	1429400	136410	433004
494	P55268	LAMB2	Laminin subunit beta-2	157050	135590	91093	1029200	-	204210	980610	432959
495	P62491	RAB11A	Ras-related protein Rab-11A	766040	177830	468020	205700	331770	897910	182880	432879
496	Q92905	COPS5	COP9 signalosome complex subunit 5	179690	49119	222070	193340	159320	2054800	126950	426470
497	P50990	CCT8	T-complex protein 1 subunit theta	426330	31990	311700	81172	98584	1964000	51434	423601
498	P17987	TCP1	T-complex protein 1 subunit alpha	196370	-	262540	172410	35836	1405400	-	414511
499	P13716	ALAD	Delta-aminolevulinic acid dehydratase	400160	88318	308980	-	524640	747830	-	413986
500	P52597	HNRNPF	Heterogeneous nuclear ribonucleoprotein F	378760	83775	300460	192470	324870	1238600	350370	409901
501	P62993	GRB2	Growth factor receptor-bound protein 2	189170	-	363210	143530	263710	1072000	-	406324
502	Q9UNZ2	NSFL1C	NSFL1 cofactor p47	84363	51426	273950	103650	286200	1774900	267500	405998
503	Q15365	PCBP1	Poly(rC)-binding protein 1	339920	71770	302370	194730	127800	1592200	208700	405356
504	Q9UJ70	NAGK	N-acetyl-D-glucosamine kinase	236820	93711	508260	155310	109350	1322500	-	404325
505	O15145	ARPC3	Actin-related protein 2/3 complex subunit 3	554120	100890	529090	397670	185270	782150	270630	402831
506	P28300	LOX	Protein-lysine 6-oxidase	231270	131370	199240	240270	-	1012100	595900	401692
507	Q96QK1	VPS35	Vacuolar protein sorting-associated protein 35	598880	644090	453010	394270	140340	500930	75017	400934
508	P62249	RPS16	40S ribosomal protein S16	329440	-	548480	293800	111670	719140	-	400506
509	Q9H8Y8	GORASP2	Golgi reassembly-stacking protein 2	167990	122090	385690	453070	317560	1242600	112430	400204
510	Q99715	COL12A1	Collagen alpha-1(XII) chain	374470	597760	177480	641010	28802	339400	638190	399587
511	P07954	FH	Fumarate hydratase, mitochondrial	658370	290770	504030	627320	163740	408780	138530	398791
512	Q13219	PAPPA	Pappalysin-1	94467	396930	134810	156450	33114	447770	1515300	396977
513	O60763	USO1	General vesicular transport factor p115	197370	84870	393860	193740	264590	1581300	62142	396839
514	Q15435	PPP1R7	Protein phosphatase 1 regulatory subunit 7	193760	216940	468630	133340	271050	1211000	282110	396690
515	Q14444	CAPRIN1	Caprin-1	220630	105970	210520	224220	-	1423200	181470	394335
516	Q9Y617	PSAT1	Phosphoserine aminotransferase	-	-	247610	89634	101310	1063900	462720	393035
517	P62333	PSMC6	26S protease regulatory subunit 10B	609040	118300	368330	253560	265240	1011700	120760	392419
518	Q9BTT0	ANP32E	Acidic leucine-rich nuclear phosphoprotein 32 family member E	387920	363800	278280	300420	-	613630	-	388810
519	P12956	XRCC6	X-ray repair cross-complementing protein 6	456240	81874	249780	271310	181680	1286300	156180	383338
520	Q6IBS0	TWF2	Twinfilin-2	-	76904	-	382840	143360	1054300	256400	382761
521	P11766	ADH5	Alcohol dehydrogenase class-3	180560	131960	220250	201170	209980	1092500	642800	382746
522	P10809	HSPD1	60 kDa heat shock protein, mitochondrial	564110	198250	200170	611730	146600	358600	593410	381839
523	P28482	MAPK1	Mitogen-activated protein kinase 1	41296	121140	246900	102800	247360	1818700	53472	375953
524	Q13098	GPS1	COP9 signalosome complex subunit 1	427460	55232	264050	266340	57118	1300500	260270	375853
525	Q92783	STAM	Signal transducing adapter molecule 1	156530	-	419930	-	240470	962950	95070	374990
526	Q76M96	CCDC80	Coiled-coil domain-containing protein 80	251420	343370	221380	715750	-	573960	138920	374133
527	P46976	GYG1	Glycogenin-1	603900	-	339510	105620	279460	541460	-	373990
528	P37837	TALDO1	Transaldolase	256820	94813	470930	317130	131760	968750	-	373367
529	Q12905	ILF2	Interleukin enhancer-binding factor 2	244160	-	241900	320400	128720	1096300	200170	371942
530	O43324	EEF1E1	Eukaryotic translation elongation factor 1 epsilon-1	337150	-	286110	320580	-	751910	151550	369460
531	Q9BY32	ITPA	Inosine triphosphate pyrophosphatase	295070	164070	-	277470	81468	1019100	-	367436
532	Q9UMS6	SYNPO2	Synaptopodin-2	546400	-	183930	59541	182490	853260	-	365124
533	P05455	SSB	Lupus La protein	188430	-	285990	-	103180	1162600	74789	362998
534	Q00839	HNRNPU	Heterogeneous nuclear ribonucleoprotein U	397260	54218	244280	174440	203790	1103400	-	362898
535	Q14767	LTBP2	Latent-transforming growth factor beta-binding protein 2	227240	77271	529500	396920	176130	1013400	92898	359051
536	P04004	VTN	Vitronectin	585970	229650	297970	261650	234820	548120	353750	358847
537	Q68BL8	OLFML2B	Olfactomedin-like protein 2B	88713	87691	77441	576500	-	-	953880	356845
538	P22234	PAICS	Multifunctional protein ADE2	506030	226630	411350	395600	71089	529250	-	356658
539	P55160	NCKAP1L	Nck-associated protein 1-like	556360	187470	494880	400520	196050	532970	124890	356163
540	P35998	PSMC2	26S protease regulatory subunit 7	628130	25571	83967	72623	141530	1307600	232330	355964
541	P98095	FBLN2	Fibulin-2	295140	240490	-	657080	-	134660	443910	354256
542	Q99538	LGMN	Legumain	405140	379120	362790	286140	-	433610	254210	353502
543	P07686	HEXB	Beta-hexosaminidase subunit beta	405130	581100	261530	460730	126340	489240	146770	352977
544	P07225	PROS1	Vitamin K-dependent protein S	383860	351960	299270	987980	22364	9623.1	404780	351405
545	Q13510	ASAH1	Acid ceramidase	-	75147	333800	152830	197290	894260	453320	351108
546	P50991	CCT4	T-complex protein 1 subunit delta	185850	40165	227630	292160	206970	1145300	-	349679
547	O00584	RNASET2	Ribonuclease T2	351190	545910	77399	622340	138180	-	-	347004
548	P10916	MYL2	Myosin regulatory light chain 2, ventricular/cardiac muscle isoform	289370	-	447150	210050	496640	287500	-	346142
549	P78539	SRPX	Sushi repeat-containing protein SRPX	338360	356150	76477	445140	98774	212880	879890	343953
550	P60983	GMFB	Glia maturation factor beta	267300	-	206780	210210	283190	737190	352120	342798
551	O15144	ARPC2	Actin-related protein 2/3 complex subunit 2	67492	69724	675220	565730	78990	850140	91460	342679
552	P46108	CRK	Adapter molecule crk	312640	124550	432660	167120	189690	974340	168950	338564
553	P55786	NPEPPS	Puromycin-sensitive aminopeptidase	166660	46420	416200	92066	696150	699100	252040	338377
554	P15289	ARSA	Arylsulfatase A	381200	427490	429170	157660	234390	483830	244120	336837
555	Q08257	CRYZ	Quinone oxidoreductase	421700	75771	335640	568000	262410	391480	294990	335713
556	Q15075	EEA1	Early endosome antigen 1	362510	80811	65756	171770	167170	1462500	24554	333582
557	P52209	PGD	6-phosphogluconate dehydrogenase, decarboxylating	492310	43621	209640	97585	89917	1310300	86197	332796
558	Q14914	PTGR1	Prostaglandin reductase 1	309580	163400	142700	355750	67304	807990	477420	332021
559	Q92598	HSPH1	Heat shock protein 105 kDa	299190	-	307940	150020	177600	916840	136500	331348
560	P48163	ME1	NADP-dependent malic enzyme	124160	117100	442950	196950	245540	1009600	169380	329383
561	P15311	EZR	Ezrin	387700	72598	652900	383010	111840	359460	-	327918
562	Q13884	SNTB1	Beta-1-syntrophin	-	77592	300440	172270	141640	945410	-	327470
563	P33176	KIF5B	Kinesin-1 heavy chain	301950	22441	147840	41017	164080	1283700	-	326838
564	Q6UXH9	PAMR1	Inactive serine protease PAMR1	215110	561520	89635	449820	33186	-	611690	326827
565	P0DMV9	HSPA1B	Heat shock 70 kDa protein 1B	190320	-	-	175670	149610	948420	157160	324236
566	P42765	ACAA2	3-ketoacyl-CoA thiolase, mitochondrial	423610	524270	139050	137060	172960	648940	215580	323067
567	O75326	SEMA7A	Semaphorin-7A	415050	201300	485690	272970	143470	634840	103760	322440
568	Q9H4A4	RNPEP	Aminopeptidase B	124790	216480	300520	197800	414270	621130	371440	320919
569	Q9Y5Z4	HEBP2	Heme-binding protein 2	360500	175740	323360	178960	265060	300250	635830	319957
570	Q14956	GPNMB	Transmembrane glycoprotein NMB	110770	85389	131000	1427200	98280	173350	213320	319901
571	O15075	DCLK1	Serine/threonine-protein kinase DCLK1	88538	10060	375720	44922	80983	1296000	-	316037
572	Q16881	TXNRD1	Thioredoxin reductase 1, cytoplasmic	205590	232660	456730	137210	354920	774120	33911	313592
573	P52272	HNRNPM	Heterogeneous nuclear ribonucleoprotein M	359820	84009	314760	343540	302370	619930	170130	313508
574	Q12792	TWF1	Twinfilin-1	543080	68622	205750	225720	128640	807480	203730	311860
575	Q9NX46	ADPRHL2	Poly(ADP-ribose) glycohydrolase ARH3	306910	-	262610	76804	604370	497850	116150	310782
576	P0DPI2	GATD3	Glutamine amidotransferase-like class 1 domain-containing protein 3, mitochondrial	444120	160920	-	149590	93413	699210	-	309451
577	P23588	EIF4B	Eukaryotic translation initiation factor 4B	250990	-	523720	134680	218800	687420	37311	308820
578	P19883	FST	Follistatin	152420	337500	338640	174640	114820	939950	102050	308574
579	Q96HE7	ERO1L	ERO1-like protein alpha	521420	76976	438150	244240	335610	-	221820	306369
580	O75436	VPS26A	Vacuolar protein sorting-associated protein 26A	141240	132650	347030	253020	160990	901620	204660	305887
581	P01023	A2M	Alpha-2-macroglobulin	288620	227930	291860	141720	338940	600060	223980	301873
582	O14773	TPP1	Tripeptidyl-peptidase 1	228530	40556	303790	360500	-	571020	-	300879
583	P62633	CNBP	Cellular nucleic acid-binding protein	224210	-	262560	-	125910	762330	107980	296598
584	Q9BS26	ERP44	Endoplasmic reticulum resident protein 44	189520	112150	209890	502320	-	564850	197570	296050
585	Q6NYC8	PPP1R18	Phostensin	72786	-	347500	269270	151570	309840	620190	295193
586	Q12906	ILF3	Interleukin enhancer-binding factor 3	317990	46073	153840	201390	97816	1160100	81087	294042
587	Q9Y490	TLN1	Talin-1	261590	59900	299680	192550	120670	1041600	54928	290131
588	Q15424	SAFB	Scaffold attachment factor B1	-	-	230620	188860	204210	707770	116320	289556
589	Q14203	DCTN1	Dynactin subunit 1	137700	-	136870	111580	181150	1035100	127830	288372
590	P16070	CD44	CD44 antigen	229570	276490	286650	425730	131190	280440	384940	287859
591	Q86U42	PABPN1	Polyadenylate-binding protein 2	194230	-	396950	-	174810	540530	118830	285070
592	Q07666	KHDRBS1	KH domain-containing, RNA-binding, signal transduction-associated protein 1	409100	-	101410	89865	116910	704450	-	284347
593	P13535	MYH8	Myosin-8	62114	6200.4	193390	52969	257630	1126100	-	283067
594	P98160	HSPG2	Basement membrane-specific heparan sulfate proteoglycan core protein	232360	120140	249340	295400	67809	521480	457510	277720
595	Q14112	NID2	Nidogen-2	80566	91767	-	1051900	-	80666	82853	277550
596	O75821	EIF3G	Eukaryotic translation initiation factor 3 subunit G	154710	70316	392750	232940	223000	748530	107950	275742
597	Q9H3P7	ACBD3	Golgi resident protein GCP60	478000	-	52179	258970	106900	471120	-	273434
598	O75083	WDR1	WD repeat-containing protein 1	437670	97850	86938	250950	189120	622880	224540	272850
599	P03956	MMP1	Interstitial collagenase	175160	73908	285250	114820	-	452780	532610	272421
600	Q15181	PPA1	Inorganic pyrophosphatase	150100	128950	338340	143080	302420	691090	146720	271529
601	Q12765	SCRN1	Secernin-1	211200	-	220560	236920	-	562220	120390	270258
602	Q00610	CLTC	Clathrin heavy chain 1	323960	70896	262310	238190	100570	747260	147430	270088
603	Q13509	TUBB3	Tubulin beta-3 chain	153720	120400	116520	-	572950	384870	-	269692
604	Q16658	FSCN1	Fascin	-	-	132560	143240	122760	559820	385660	268808
605	Q8IX30	SCUBE3	Signal peptide, CUB and EGF-like domain-containing protein 3	-	229060	181300	438300	-	279160	201960	265956
606	P16152	CBR1	Carbonyl reductase [NADPH] 1	373200	78185	269460	176440	123330	635300	196380	264614
607	Q99832	CCT7	T-complex protein 1 subunit eta	259290	23101	275800	164640	56452	802770	-	263676
608	Q96KG7	MEGF10	Multiple epidermal growth factor-like domains protein 10	167010	-	251420	45813	218930	824460	70293	262988
609	P11940	PABPC1	Polyadenylate-binding protein 1	292640	96269	240210	171200	133310	881180	25301	262873
610	P27361	MAPK3	Mitogen-activated protein kinase 3	341210	130300	229710	350820	-	360860	164140	262840
611	P17980	PSMC3	26S protease regulatory subunit 6A	316590	-	231570	120100	110870	703550	92130	262468
612	P35613	BSG	Basigin	-	288470	300440	185750	383130	248220	163310	261553
613	Q9BXK5	BCL2L13	Bcl-2-like protein 13	108100	-	159530	234360	471140	332590	-	261144
614	P25788	PSMA3	Proteasome subunit alpha type-3	305650	-	254830	156280	327790	-	253260	259562
615	Q9BY76	ANGPTL4	Angiopoietin-related protein 4	247610	167290	277840	248210	-	414540	187030	257087
616	Q15019	SEPT2	Septin-2	221310	85782	305200	174160	150500	625640	233070	256523
617	Q02809	PLOD1	Procollagen-lysine,2-oxoglutarate 5-dioxygenase 1	74168	249710	425920	269820	83278	565220	125850	256281
618	O14786	NRP1	Neuropilin-1	380950	137430	236430	60841	198080	240020	535820	255653
619	P12955	PEPD	Xaa-Pro dipeptidase	231590	-	148690	117880	263930	358230	394640	252493
620	P31942	HNRNPH3	Heterogeneous nuclear ribonucleoprotein H3	-	200520	-	89597	101330	748640	120860	252189
621	P55036	PSMD4	26S proteasome non-ATPase regulatory subunit 4	189980	126630	274280	223770	109330	588330	-	252053
622	Q8N0X7	SPG20	Spartin	592900	27880	293310	210330	-	288760	81405	249098
623	P00813	ADA	Adenosine deaminase	160490	106530	39165	490190	-	120060	563190	246604
624	P42785	PRCP	Lysosomal Pro-X carboxypeptidase	-	99118	135660	304860	119920	280500	538660	246453
625	P14543	NID1	Nidogen-1	130580	199710	117190	458040	-	109060	446220	243467
626	P31939	ATIC	Bifunctional purine biosynthesis protein PURH	239180	74269	126610	44465	77853	1069800	44104	239469
627	P35241	RDX	Radixin	244210	-	-	158390	142700	484380	166170	239170
628	P31150	GDI1	Rab GDP dissociation inhibitor alpha	161710	-	164800	57882	173750	733480	143120	239124
629	P31948	STIP1	Stress-induced-phosphoprotein 1	130870	53573	127030	21334	329010	902110	89135	236152
630	Q13126	MTAP	S-methyl-5-thioadenosine phosphorylase	299410	-	90844	149130	184260	456550	-	236039
631	Q7L2H7	EIF3M	Eukaryotic translation initiation factor 3 subunit M	344050	116350	66483	153550	96058	732380	127920	233827
632	Q96TA1	FAM129B	Niban-like protein 1	-	179200	281130	209730	299690	355360	59402	230752
633	Q92973	TNPO1	Transportin-1	164960	-	170250	107190	68096	637880	-	229675
634	Q7Z739	YTHDF3	YTH domain-containing family protein 3	288610	52772	211540	165390	156980	604630	117090	228145
635	Q32MZ4	LRRFIP1	Leucine-rich repeat flightless-interacting protein 1	262690	-	274880	73442	114600	472840	164550	227167
636	O14579	COPE	Coatomer subunit epsilon	203900	111800	229690	162870	-	511190	134850	225717
637	O43776	NARS	Asparagine--tRNA ligase, cytoplasmic	114120	32002	124130	158280	-	696950	-	225096
638	O95302	FKBP9	Peptidyl-prolyl cis-trans isomerase FKBP9	338850	146370	224510	238560	144870	315840	143910	221844
639	P40227	CCT6A	T-complex protein 1 subunit zeta	53789	255510	450990	466490	96804	165620	62872	221725
640	P80303	NUCB2	Nucleobindin-2	489130	117250	309280	222990	18049	188600	201750	221007
641	P04066	FUCA1	Tissue alpha-L-fucosidase	158230	100960	135890	-	582760	123770	-	220322
642	O00391	QSOX1	Sulfhydryl oxidase 1	322330	173880	266590	197650	-	207030	153980	220243
643	P05362	ICAM1	Intercellular adhesion molecule 1	221440	281330	-	329030	37765	207000	240320	219481
644	P43686	PSMC4	26S protease regulatory subunit 6B	397280	208950	53009	328340	79849	302590	156250	218038
645	Q13501	SQSTM1	Sequestosome-1	123850	80921	271890	93276	-	518780	-	217743
646	P53634	CTSC	Dipeptidyl peptidase 1	93730	-	162320	354380	-	207530	266730	216938
647	P48643	CCT5	T-complex protein 1 subunit epsilon	146950	102490	98961	88982	363370	493940	-	215782
648	P07814	EPRS	Bifunctional glutamate/proline--tRNA ligase	269500	19611	198960	87689	13346	835770	51950	210975
649	Q15046	KARS	Lysine--tRNA ligase	329190	77121	235740	192860	102350	439620	93756	210091
650	O95336	PGLS	6-phosphogluconolactonase	379740	-	136860	102420	148260	351920	124200	207233
651	Q10567	AP1B1	AP-1 complex subunit beta-1	219050	128480	141290	265170	22065	383840	283730	206232
652	O43242	PSMD3	26S proteasome non-ATPase regulatory subunit 3	177680	51884	299540	97049	235670	375180	-	206167
653	P15502	ELN	Elastin	-	-	118470	139770	123220	501970	140440	204774
654	Q08431	MFGE8	Lactadherin	147600	200300	62018	310270	-	128670	372450	203551
655	Q96HC4	PDLIM5	PDZ and LIM domain protein 5	249190	230320	225590	145790	154510	351040	58740	202169
656	P08254	MMP3	Stromelysin-1	39896	-	203650	183880	-	512450	69616	201898
657	P00749	PLAU	Urokinase-type plasminogen activator	361530	-	133190	220530	52293	251700	187960	201200
658	P62906	RPL10A	60S ribosomal protein L10a	219320	142780	241790	233440	84528	283020	190400	199325
659	P30566	ADSL	Adenylosuccinate lyase	144680	-	148280	99090	92729	625900	85116	199299
660	Q15904	ATP6AP1	V-type proton ATPase subunit S1	221130	91181	-	261590	-	305850	113930	198736
661	Q9Y3F4	STRAP	Serine-threonine kinase receptor-associated protein	191650	-	107890	304740	64802	301710	-	194158
662	P09104	ENO2	Gamma-enolase	154230	71834	365600	106510	305010	163210	155950	188906
663	Q14974	KPNB1	Importin subunit beta-1	-	39638	424460	92689	-	224210	140220	184243
664	O00622	CYR61	Protein CYR61	252000	59038	102410	91977	206010	509690	67930	184151
665	Q9Y678	COPG1	Coatomer subunit gamma-1	124930	7224.2	140820	229110	41282	671930	66775	183153
666	Q14697	GANAB	Neutral alpha-glucosidase AB	558900	19588	109230	180880	85395	295080	26891	182281
667	Q16531	DDB1	DNA damage-binding protein 1	-	38795	144850	98168	93709	622690	71812	178337
668	P07741	APRT	Adenine phosphoribosyltransferase	193350	-	179250	137700	159080	399120	0	178083
669	P06865	HEXA	Beta-hexosaminidase subunit alpha	457180	-	0	182380	67597	224340	127600	176516
670	Q13557	CAMK2D	Calcium/calmodulin-dependent protein kinase type II subunit delta	282140	116080	230180	269780	116510	169810	43762	175466
671	P49368	CCT3	T-complex protein 1 subunit gamma	300320	-	266070	256340	38498	190100	0	175221
672	P24043	LAMA2	Laminin subunit alpha-2	89071	98066	153630	223780	38606	262110	342680	172563
673	P62195	PSMC5	26S protease regulatory subunit 8	163810	-	75106	84223	34869	561780	114670	172410
674	Q9Y6C2	EMILIN1	EMILIN-1	132960	157860	69184	427720	-	131180	114340	172207
675	P49023	PXN	Paxillin	164990	-	132910	63620	108740	386140	-	171280
676	Q13200	PSMD2	26S proteasome non-ATPase regulatory subunit 2	162110	48466	138980	64232	44849	681500	33807	167706
677	Q99460	PSMD1	26S proteasome non-ATPase regulatory subunit 1	141820	21082	103600	42552	84426	674010	97916	166487
678	Q9H488	POFUT1	GDP-fucose protein O-fucosyltransferase 1	186040	74230	149620	150920	49823	311820	241860	166330
679	Q7KZF4	SND1	Staphylococcal nuclease domain-containing protein 1	204970	27142	50584	107320	52285	622050	65012	161338
680	P45974	USP5	Ubiquitin carboxyl-terminal hydrolase 5	91356	67806	145690	76635	72228	638710	33572	160857
681	Q9NRN5	OLFML3	Olfactomedin-like protein 3	144080	49918	-	165400	-	200120	239970	159898
682	P55884	EIF3B	Eukaryotic translation initiation factor 3 subunit B	188840	-	132040	160970	74573	351540	49409	159562
683	P54819	AK2	Adenylate kinase 2, mitochondrial	-	-	175030	139240	112680	246890	114360	157640
684	Q86VP6	CAND1	Cullin-associated NEDD8-dissociated protein 1	174450	47980	118620	83977	68169	432970	153920	154298
685	Q9UNW1	MINPP1	Multiple inositol polyphosphate phosphatase 1	153730	-	85314	111400	-	278300	138880	153525
686	Q8N6G6	ADAMTSL1	ADAMTS-like protein 1	200980	136970	-	243840	-	77156	108060	153401
687	Q10471	GALNT2	Polypeptide N-acetylgalactosaminyltransferase 2	173440	135880	64226	171740	-	-	219180	152893
688	Q9UPN3	MACF1	Microtubule-actin cross-linking factor 1, isoforms 1/2/3/5	59622	-	71703	8976.8	61854	560590	-	152549
689	P13797	PLS3	Plastin-3	62021	36097	68171	100740	35348	434590	330470	152491
690	Q9ULV4	CORO1C	Coronin-1C	185930	26427	179620	121460	101850	357950	89500	151820
691	Q13740	ALCAM	CD166 antigen	194400	100300	124430	364670	0	218060	58670	151504
692	P46940	IQGAP1	Ras GTPase-activating-like protein IQGAP1	62126	234780	198140	150270	76626	310230	22821	150713
693	P13611	VCAN	Versican core protein	215440	163200	132810	78898	55474	251480	151950	149893
694	P00367	GLUD1	Glutamate dehydrogenase 1, mitochondrial	392920	131820	83644	78344	85405	149100	125940	149596
695	Q15436	SEC23A	Protein transport protein Sec23A	242650	87173	129730	108610	72102	325530	75610	148772
696	Q13822	ENPP2	Ectonucleotide pyrophosphatase/phosphodiesterase family member 2	104040	247400	40577	107760	-	-	229180	145791
697	P08603	CFH	Complement factor H	181100	94024	48832	231350	17291	123090	311180	143838
698	Q9NXG2	THUMPD1	THUMP domain-containing protein 1	60401	-	35281	117030	-	420930	84634	143655
699	O94769	ECM2	Extracellular matrix protein 2	438590	44979	60791	87360	-	-	84702	143284
700	P20042	EIF2S2	Eukaryotic translation initiation factor 2 subunit 2	136170	-	154500	91268	61705	293340	102240	139870
701	Q32P28	LEPRE1	Prolyl 3-hydroxylase 1	-	80901	82665	96578	35317	394390	145920	139295
702	Q14764	MVP	Major vault protein	64731	93293	45579	230190	48239	289280	201870	139026
703	P04083	ANXA1	Annexin A1	258850	102270	79554	67093	158560	-	159280	137601
704	Q9Y4L1	HYOU1	Hypoxia up-regulated protein 1	142590	83864	61768	102100	16871	514860	29156	135887
705	Q3KQU3	MAP7D1	MAP7 domain-containing protein 1	71616	-	21023	45871	35054	582800	50887	134542
706	P53618	COPB1	Coatomer subunit beta	59924	63992	60562	65013	71725	547970	72043	134461
707	P02768	ALB	Serum albumin	-	401810	76202	71676	49129	-	67448	133253
708	Q8WX93	PALLD	Palladin	15837	-	181550	26161	78569	360260	-	132475
709	P43490	NAMPT	Nicotinamide phosphoribosyltransferase	86946	73608	-	253410	61501	270420	47675	132260
710	Q9HC38	GLOD4	Glyoxalase domain-containing protein 4	107080	95818	135730	50672	99436	292820	143760	132188
711	Q8WUY3	PRUNE2	Protein prune homolog 2	178560	31042	138980	42595	113170	395600	25358	132186
712	P23246	SFPQ	Splicing factor, proline- and glutamine-rich	113280	-	-	54356	131450	289560	60881	129905
713	P06576	ATP5B	ATP synthase subunit beta, mitochondrial	150610	71766	108230	185330	64783	187910	136630	129323
714	Q9Y230	RUVBL2	RuvB-like 2	90532	43442	154950	68829	-	347380	68311	128907
715	O14617	AP3D1	AP-3 complex subunit delta-1	168990	22675	254890	-	100810	-	75674	124608
716	P42224	STAT1	Signal transducer and activator of transcription 1-alpha/beta	189680	63624	103540	96359	-	245110	31233	121591
717	Q9BT78	COPS4	COP9 signalosome complex subunit 4	159480	36085	77529	75266	55857	383240	51671	119875
718	Q7Z4V5	HDGFRP2	Hepatoma-derived growth factor-related protein 2	48675	-	74289	108650	94817	270170	-	119320
719	Q99613	EIF3C	Eukaryotic translation initiation factor 3 subunit C	64807	54541	36488	28555	32510	590230	25555	118955
720	P53396	ACLY	ATP-citrate synthase	151290	35916	102970	176240	27986	254260	67557	116603
721	P19320	VCAM1	Vascular cell adhesion protein 1	253310	12808	83245	27555	210910	110650	-	116413
722	Q16666	IFI16	Gamma-interferon-inducible protein 16	106430	77867	33786	203870	-	153700	-	115131
723	P14868	DARS	Aspartate--tRNA ligase, cytoplasmic	101300	-	96757	58638	20612	341310	63498	113686
724	O76094	SRP72	Signal recognition particle subunit SRP72	85329	-	91269	60838	77450	237460	-	110469
725	Q9UHB6	LIMA1	LIM domain and actin-binding protein 1	85689	-	126040	142680	102870	129910	71072	109710
726	P13010	XRCC5	X-ray repair cross-complementing protein 5	85718	-	-	66736	41688	327710	20345	108439
727	P09960	LTA4H	Leukotriene A-4 hydrolase	89366	-	65780	-	88509	218190	70727	106514
728	Q14118	DAG1	Dystroglycan	265300	24929	28011	22718	18124	47653	324400	104448
729	Q6YHK3	CD109	CD109 antigen	-	82267	67089	134890	16806	146930	157450	100905
730	Q92626	PXDN	Peroxidasin homolog	58881	215430	53323	77479	91520	88063	112170	99552.3
731	Q14766	LTBP1	Latent-transforming growth factor beta-binding protein 1	100050	39377	29029	233590	33655	58053	202310	99437.7
732	Q03001	DST	Dystonin	83948	41611	-	107560	14587	253150	91530	98731
733	Q15262	PTPRK	Receptor-type tyrosine-protein phosphatase kappa	95057	36052	62585	88721	32385	273850	-	98108.3
734	P13807	GYS1	Glycogen [starch] synthase, muscle	25418	-	42229	82532	46500	264530	-	92241.8
735	P41250	GARS	Glycine--tRNA ligase	44876	18175	95415	62681	38729	327830	53227	91561.9
736	P49354	FNTA	Protein farnesyltransferase/geranylgeranyltransferase type-1 subunit alpha	60400	-	65517	-	49977	189080	91153	91225.4
737	P38606	ATP6V1A	V-type proton ATPase catalytic subunit A	166360	83404	63946	-	-	77880	62430	90804
738	P13497	BMP1	Bone morphogenetic protein 1	128690	-	-	28068	100480	129240	37520	84799.6
739	Q8N3D4	EHBP1L1	EH domain-binding protein 1-like protein 1	136970	12932	28836	29438	192600	171430	19408	84516.3
740	Q8WUM4	PDCD6IP	Programmed cell death 6-interacting protein	52144	19526	48510	122000	-	211620	48931	83788.5
741	O95487	SEC24B	Protein transport protein Sec24B	114260	28548	89354	96655	30909	162590	48782	81585.4
742	P08572	COL4A2	Collagen alpha-2(IV) chain	16617	47901	44949	178430	-	115240	85198	81389.2
743	P11413	G6PD	Glucose-6-phosphate 1-dehydrogenase	99656	57612	39640	46323	-	149630	-	78572.2
744	O00754	MAN2B1	Lysosomal alpha-mannosidase	107780	34697	93775	52563	78499	114440	62545	77757
745	P41252	IARS	Isoleucine--tRNA ligase, cytoplasmic	-	17587	109360	75587	47137	182130	26428	76371.5
746	P20929	NEB	Nebulin	91017	38105	26230	108200	11844	37850	175010	69750.9
747	P25705	ATP5A1	ATP synthase subunit alpha, mitochondrial	147040	-	23899	55276	26414	92303	-	68986.4
748	Q8WWI1	LMO7	LIM domain only protein 7	61020	14656	66079	-	58813	135940	-	67301.6
749	Q8WZ42	TTN	Titin	29054	1347.2	54845	2134.7	48500	329120	4051	67007.4
750	Q07954	LRP1	Prolow-density lipoprotein receptor-related protein	69821	43755	67656	112580	40632	67569	54905	65274
751	O60568	PLOD3	Procollagen-lysine,2-oxoglutarate 5-dioxygenase 3	43797	33321	47335	108630	22162	133510	-	64792.5
752	Q14152	EIF3A	Eukaryotic translation initiation factor 3 subunit A	99561	-	51900	-	48540	69138	21632	58154.2
753	Q9UBG0	MRC2	C-type mannose receptor 2	55065	31371	59716	46983	28925	126720	43466	56035.1
754	P02462	COL4A1	Collagen alpha-1(IV) chain	71307	50015	12132	135190	-	30547	19577	53128
755	O00159	MYO1C	Unconventional myosin-Ic	47389	-	54503	41961	45756	70292	-	51980.2
756	O43491	EPB41L2	Band 4.1-like protein 2	64488	13879	30632	40501	-	90641	-	48028.2
757	P53621	COPA	Coatomer subunit alpha	-	20960	49017	81846	13652	78203	25340	44836.3
758	P25391	LAMA1	Laminin subunit alpha-1	29950	160620	15641	24179	7696.7	-	16664	42458.5
759	P11717	IGF2R	Cation-independent mannose-6-phosphate receptor	3672.6	-	119680	9471.8	7781.5	60176	-	40156.4
760	Q13308	PTK7	Inactive tyrosine-protein kinase 7	42957	16358	56761	33224	29584	-	-	35776.8
761	Q14204	DYNC1H1	Cytoplasmic dynein 1 heavy chain 1	47640	13080	12913	17788	19498	81748	7158.9	28546.6
762	Q8IVF2	AHNAK2	Protein AHNAK2	10724	3565.4	20099	14470	3982.2	24816	4911.3	11795.4
