# Supplementary material for: Interplay between Cultured Human Osteoblastic and Skeletal Muscle Cells: Effects of Conditioned Media on Glucose and Fatty Acid Metabolism
Source: MDPI journal article supplement (doi:10.3390/biomedicines11112908), 2023-10-27
Supplement: s1 [file Suppl.Table_S3_Proteome_full list.xlsx]

## Sheet: Sheet1
Protein IDs	Protein symbol	Protein names	Log 2 fold change	p-value	Log 10 p-value
P12081	HARS	Histidine--tRNA ligase, cytoplasmic	-2.81062e-05	0.999273	0.000315918
P68032	ACTC1	Actin, alpha cardiac muscle 1	-1.63037e-05	0.998759	0.000539217
O43615	TIMM44	Mitochondrial import inner membrane translocase subunit TIM44	-1.56368e-05	0.998647	0.00058793
P61586	RHOA	Transforming protein RhoA	-7.03719e-05	0.997522	0.00107753
Q02218	OGDH	2-oxoglutarate dehydrogenase, mitochondrial	-7.88874e-05	0.996922	0.00133892
Q9Y287	ITM2B	Integral membrane protein 2B	-0.000293139	0.996903	0.00134704
P11766	ADH5	Alcohol dehydrogenase class-3	0.000115578	0.993114	0.00300087
Q13813	SPTAN1	Spectrin alpha chain, non-erythrocytic 1	-0.000310385	0.992901	0.00309406
P09960	LTA4H	Leukotriene A-4 hydrolase	0.00026142	0.992448	0.00329203
Q15067	ACOX1	Peroxisomal acyl-coenzyme A oxidase 1	-0.0003842	0.992366	0.00332809
O75380	NDUFS6	NADH dehydrogenase [ubiquinone] iron-sulfur protein 6, mitochondrial	-0.000237752	0.990652	0.00407896
P0DPI2	GATD3	Glutamine Amidotransferase Class 1 Domain Containing 3	0.00013934	0.990469	0.00415902
O95169	NDUFB8	NADH dehydrogenase [ubiquinone] 1 beta subcomplex subunit 8, mitochondrial	0.00125279	0.990034	0.00434993
P25325	MPST	3-mercaptopyruvate sulfurtransferase	0.00129151	0.989682	0.00450454
Q6P2E9	EDC4	Enhancer of mRNA-decapping protein 4	-0.000362548	0.989066	0.0047749
Q3KQU3	MAP7D1	MAP7 domain-containing protein 1	0.000437548	0.989003	0.00480235
P48147	PREP	Prolyl endopeptidase	0.000669176	0.988039	0.00522593
Q9BVL2	NUPL1	Nucleoporin p58/p45	-0.00180068	0.988032	0.00522895
O60884	DNAJA2	DnaJ homolog subfamily A member 2	0.000731603	0.987512	0.00545741
O43169	CYB5B	Cytochrome b5 type B	0.00118008	0.987288	0.00555603
P29401	TKT	Transketolase	-0.000254821	0.986903	0.00572569
Q12907	LMAN2	Vesicular integral-membrane protein VIP36	0.000417501	0.986391	0.00595087
Q9Y6G9	DYNC1LI1	Cytoplasmic dynein 1 light intermediate chain 1	-0.000297161	0.985859	0.00618514
Q9P2E9	RRBP1	Ribosome-binding protein 1	-0.000134021	0.985811	0.00620631
P62244	RPS15A	40S ribosomal protein S15a	0.000173057	0.985276	0.00644218
P61812	TGFB2	Transforming growth factor beta-2	-0.000293565	0.983983	0.00701235
O75607	NPM3	Nucleoplasmin-3	0.000683977	0.982311	0.00775086
Q13523	PRPF4B	Serine/threonine-protein kinase PRP4 homolog	0.00168981	0.981867	0.00794725
Q96EU7	C1GALT1C1	C1GALT1-specific chaperone 1	-0.00116397	0.98168	0.00802988
Q14714	SSPN	Sarcospan	-0.000691661	0.981464	0.00812575
Q96IX5	USMG5	Up-regulated during skeletal muscle growth protein 5	0.000104127	0.980718	0.00845575
P37108	SRP14	Signal recognition particle 14 kDa protein	-0.000280606	0.980605	0.00850604
P62318	SNRPD3	Small nuclear ribonucleoprotein Sm D3	-0.000376766	0.979658	0.00892549
Q13586	STIM1	Stromal interaction molecule 1	-0.00041335	0.979598	0.008952
Q08378	GOLGA3	Golgin subfamily A member 3	-0.00102615	0.97931	0.00908
O14786	NRP1	Neuropilin-1	0.000427778	0.97812	0.00960792
Q14203	DCTN1	Dynactin subunit 1	-0.000435091	0.978103	0.00961551
P55957	BID	BH3-interacting domain death agonist	0.00178397	0.978051	0.00963833
Q8N5K1	CISD2	CDGSH iron-sulfur domain-containing protein 2	-0.00219655	0.978018	0.00965323
Q15717	ELAVL1	ELAV-like protein 1	-0.000366603	0.977341	0.00995372
P21397	MAOA	Amine oxidase [flavin-containing] A	-0.00133432	0.976938	0.010133
Q96PU8	QKI	Protein quaking	0.000726882	0.976389	0.0103773
Q8N129	CNPY4	Protein canopy homolog 4	-0.000909463	0.976285	0.0104236
P62829	RPL23	60S ribosomal protein L23	-0.00022548	0.974476	0.0112288
Q7L5N1	COPS6	COP9 signalosome complex subunit 6	0.000758496	0.973855	0.0115056
P62854	RPS26	40S ribosomal protein S26	0.000949528	0.973583	0.011627
Q03135	CAV1	Caveolin-1	0.000795508	0.972225	0.0122332
O15305	PMM2	Phosphomannomutase 2	-0.00209916	0.972142	0.0122705
P08590	MYL3	Myosin light chain 3	-0.00446528	0.97153	0.0125439
P46736	BRCC3	Lys-63-specific deubiquitinase BRCC36	0.00196744	0.971224	0.0126806
P61513	RPL37A	60S ribosomal protein L37a	-0.00104455	0.971047	0.0127596
Q9ULH0	KIDINS220	Kinase D-interacting substrate of 220 kDa	0.00150093	0.970164	0.0131547
Q99470	SDF2	Stromal cell-derived factor 2	-0.0018325	0.969895	0.0132751
P13861	PRKAR2A	cAMP-dependent protein kinase type II-alpha regulatory subunit	-0.00046636	0.969888	0.0132785
Q8NDM7	CFAP43	Cilia- and flagella-associated protein 43	0.00644175	0.968843	0.0137468
P78346	RPP30	Ribonuclease P protein subunit p30	0.00146159	0.96854	0.0138824
Q7KZF4	SND1	Staphylococcal nuclease domain-containing protein 1	-0.000398464	0.967716	0.0142522
O75165	DNAJC13	DnaJ homolog subfamily C member 13	0.000648037	0.967546	0.0143285
P38571	LIPA	Lysosomal acid lipase/cholesteryl ester hydrolase	-0.00162114	0.967537	0.0143324
Q6ZVM7	TOM1L2	TOM1-like protein 2	0.00323191	0.966521	0.0147888
Q04637	EIF4G1	Eukaryotic translation initiation factor 4 gamma 1	0.000502034	0.965781	0.0151213
Q96CM8	ACSF2	Acyl-CoA synthetase family member 2, mitochondrial	0.00206467	0.965398	0.0152936
P15289	ARSA	Arylsulfatase A	-0.000743221	0.965071	0.0154406
Q9UI09	NDUFA12	NADH dehydrogenase [ubiquinone] 1 alpha subcomplex subunit 12	0.000578261	0.964738	0.0155908
O15212	PFDN6	Prefoldin subunit 6	0.00263401	0.964589	0.0156577
P48509	CD151	CD151 antigen	-0.00544841	0.96421	0.0158284
P62316	SNRPD2	Small nuclear ribonucleoprotein Sm D2	0.000597785	0.964178	0.0158429
P17812	CTPS1	CTP synthase 1	-0.00129727	0.963958	0.015942
Q99877	HIST1H2BN	Histone H2B type 1-N	0.000922075	0.96341	0.0161888
O75569	PRKRA	Interferon-inducible double-stranded RNA-dependent protein kinase activator A	-0.000592814	0.963172	0.016296
Q9UKV3	ACIN1	Apoptotic chromatin condensation inducer in the nucleus	-0.00068067	0.962692	0.0165128
P07305	H1F0	Histone H1.0	0.000561966	0.961412	0.0170906
Q16629	SRSF7	Serine/arginine-rich splicing factor 7	0.00114509	0.960313	0.0175874
P13073	COX4I1	Cytochrome c oxidase subunit 4 isoform 1, mitochondrial	0.000747283	0.960254	0.0176139
P13164	IFITM1	Interferon-induced transmembrane protein 1	-0.00319387	0.959247	0.0180695
Q9Y295	DRG1	Developmentally-regulated GTP-binding protein 1	0.000808492	0.958772	0.0182848
Q9NV96	TMEM30A	Cell cycle control protein 50A	0.0032279	0.958398	0.0184541
O95292	VAPB	Vesicle-associated membrane protein-associated protein B/C	-0.000627386	0.958052	0.0186109
Q9HB07	C12orf10	UPF0160 protein MYG1, mitochondrial	-0.00235115	0.957965	0.0186502
Q9BPW8	NIPSNAP1	Protein NipSnap homolog 1	0.000973568	0.957048	0.0190662
P00568	AK1	Adenylate kinase isoenzyme 1	0.00167858	0.955375	0.0198262
O43402	EMC8	ER membrane protein complex subunit 8	-0.00136617	0.954782	0.0200957
Q00610	CLTC	Clathrin heavy chain 1	-0.000372788	0.954729	0.0201199
Q0VGL1	LAMTOR4	Ragulator complex protein LAMTOR4	-0.00386098	0.953493	0.0206825
Q14232	EIF2B1	Translation initiation factor eIF-2B subunit alpha	-0.00351602	0.953479	0.0206888
Q8N3L3	TXLNB	Beta-taxilin	0.00304569	0.953439	0.020707
Q8IUG5	MYO18B	Unconventional myosin-XVIIIb	-0.00322824	0.953123	0.020851
Q08209	PPP3CA	Serine/threonine-protein phosphatase 2B catalytic subunit alpha isoform	0.000986224	0.952971	0.0209203
P49588	AARS	Alanine--tRNA ligase, cytoplasmic	-0.000840058	0.952939	0.0209349
Q9UHD8	SEP9	Septin-9	-0.00107355	0.952847	0.020977
Q9P291	ARMCX1	Armadillo repeat-containing X-linked protein 1	-0.00317	0.951738	0.0214826
P26373	RPL13	60S ribosomal protein L13	0.00185162	0.951688	0.0215052
Q9NRY5	FAM114A2	Protein FAM114A2	-0.00327829	0.951483	0.0215988
O14653	GOSR2	Golgi SNAP receptor complex member 2	-0.000802311	0.950899	0.0218655
P28799	GRN	Granulins	-0.000904688	0.949486	0.0225115
P61916	NPC2	Epididymal secretory protein E1	-0.00117714	0.948051	0.0231681
Q99615	DNAJC7	DnaJ homolog subfamily C member 7	-0.00483411	0.947446	0.0234457
Q96HJ9	FMC1	Formation Of Mitochondrial Complex V Assembly Factor 1 Homolog	0.00378218	0.947241	0.0235396
Q3ZCQ8	TIMM50	Mitochondrial import inner membrane translocase subunit TIM50	0.00368295	0.947117	0.0235963
P42765	ACAA2	3-ketoacyl-CoA thiolase, mitochondrial	-0.000455289	0.946939	0.0236779
Q86W42	THOC6	THO complex subunit 6 homolog	0.00357835	0.946709	0.0237833
P27348	YWHAQ	14-3-3 protein theta	-0.00109665	0.946388	0.023931
O00487	PSMD14	26S proteasome non-ATPase regulatory subunit 14	-0.00174987	0.945662	0.0242643
P28838	LAP3	Cytosol aminopeptidase	-0.000710358	0.945069	0.0245364
Q15637	SF1	Splicing factor 1	0.00386857	0.944825	0.0246486
P46778	RPL21	60S ribosomal protein L21	0.00105246	0.944787	0.0246662
Q9Y6N5	SQRDL	Sulfide:quinone oxidoreductase, mitochondrial	-0.000425013	0.944586	0.0247585
Q16740	CLPP	ATP-dependent Clp protease proteolytic subunit, mitochondrial	-0.00663883	0.944156	0.0249561
Q14978	NOLC1	Nucleolar and coiled-body phosphoprotein 1	0.00267393	0.943048	0.025466
P22061	PCMT1	Protein-L-isoaspartate(D-aspartate) O-methyltransferase	0.00258216	0.943007	0.0254852
O15427	SLC16A3	Monocarboxylate transporter 4	-0.0102659	0.942823	0.0255699
P62273	RPS29	40S ribosomal protein S29	0.00800454	0.942616	0.0256653
P14618	PKM	Pyruvate kinase PKM	-0.000792122	0.942398	0.0257656
P28161	GSTM2	Glutathione S-transferase Mu 2	-0.00638996	0.942113	0.025897
Q00765	REEP5	Receptor expression-enhancing protein 5	-0.0012952	0.941881	0.0260039
Q9HC78	ZBTB20	Zinc finger and BTB domain-containing protein 20	0.00627972	0.941491	0.0261838
Q6UXH1	CRELD2	Cysteine-rich with EGF-like domain protein 2	0.00731081	0.940997	0.0264118
Q8WTS6	SETD7	Histone-lysine N-methyltransferase SETD7	-0.00198816	0.940921	0.0264467
Q15276	RABEP1	Rab GTPase-binding effector protein 1	-0.00123227	0.94024	0.0267613
Q99996	AKAP9	A-kinase anchor protein 9	0.00774843	0.938868	0.0273953
Q8IVL6	LEPREL2	Prolyl 3-hydroxylase 3	0.00219798	0.938774	0.027439
Q58FF8	HSP90AB2P	Putative heat shock protein HSP 90-beta 2	-0.00200071	0.938293	0.0276616
P10916	MYL2	Myosin regulatory light chain 2, ventricular/cardiac muscle isoform	0.00370039	0.936724	0.0283885
P12235	SLC25A4	ADP/ATP translocase 1	-0.000883009	0.936572	0.0284589
Q8NDH3	NPEPL1	Probable aminopeptidase NPEPL1	0.00778486	0.936544	0.0284718
Q9UPN3	MACF1	Microtubule-actin cross-linking factor 1, isoforms 1/2/3/5	-0.000872718	0.935382	0.0290109
Q96EY7	PTCD3	Pentatricopeptide repeat domain-containing protein 3, mitochondrial	-0.00137228	0.935318	0.0290409
Q96E11	MRRF	Ribosome-recycling factor, mitochondrial	-0.00380482	0.935032	0.0291733
A0AVT1	UBA6	Ubiquitin-like modifier-activating enzyme 6	-0.0064746	0.934101	0.0296062
Q14155	ARHGEF7	Rho guanine nucleotide exchange factor 7	-0.00412884	0.93367	0.0298064
P02545	LMNA	Prelamin-A/C	-0.00154252	0.933112	0.0300662
Q93077	H2AC6	H2A Clustered Histone 6	-0.00479669	0.932767	0.0302269
Q9Y606	PUS1	tRNA pseudouridine synthase A, mitochondrial	0.00198339	0.932424	0.0303864
P47756	CAPZB	F-actin-capping protein subunit beta	-0.000497071	0.93232	0.0304348
P21589	NT5E	5-nucleotidase	0.00136384	0.931762	0.0306952
O43175	PHGDH	D-3-phosphoglycerate dehydrogenase	0.00172171	0.931367	0.0308792
Q13185	CBX3	Chromobox protein homolog 3	0.00241575	0.930724	0.031179
O95671	ASMTL	N-acetylserotonin O-methyltransferase-like protein	-0.00236954	0.930435	0.0313142
Q9Y262	EIF3L	Eukaryotic translation initiation factor 3 subunit L	-0.00252034	0.930286	0.0313835
O00217	NDUFS8	NADH dehydrogenase [ubiquinone] iron-sulfur protein 8, mitochondrial	-0.00112684	0.929856	0.0315845
Q9UHX1	PUF60	Poly(U)-binding-splicing factor PUF60	-0.00145872	0.92939	0.0318021
Q00341	HDLBP	Vigilin	-0.000801768	0.928689	0.0321299
P19784	CSNK2A2	Casein kinase II subunit alpha	-0.00290726	0.928505	0.032216
Q86V81	ALYREF	THO complex subunit 4	-0.00170724	0.928296	0.0323136
Q2TBA0	KLHL40	Kelch-like protein 40	-0.00121603	0.928274	0.0323237
P00352	ALDH1A1	Retinal dehydrogenase 1	0.00113821	0.928229	0.032345
Q9H0E2	TOLLIP	Toll-interacting protein	-0.00232448	0.928153	0.0323802
Q92508	PIEZO1	Piezo-type mechanosensitive ion channel component 1	-0.00661155	0.927868	0.032514
P41227	NAA10	N-alpha-acetyltransferase 10	-0.00198012	0.927817	0.0325378
P47813	EIF1AX	Eukaryotic translation initiation factor 1A, X-linked	0.0032261	0.927553	0.0326613
Q9Y2T2	AP3M1	AP-3 complex subunit mu-1	-0.00340828	0.927549	0.0326632
O14744	PRMT5	Protein arginine N-methyltransferase 5	-0.00585107	0.927163	0.0328437
P11940	PABPC1	Polyadenylate-binding protein 1	-0.000980564	0.926716	0.0330534
P15328	FOLR1	Folate receptor alpha	-0.00620273	0.926699	0.0330614
O75083	WDR1	WD repeat-containing protein 1	-0.000765289	0.92653	0.0331407
P05362	ICAM1	Intercellular adhesion molecule 1	0.00371617	0.926366	0.0332174
P39059	COL15A1	Collagen alpha-1(XV) chain	-0.00467367	0.926195	0.0332977
P04439	HLA-A	HLA class I histocompatibility antigen, A-3 alpha chain	0.00113201	0.925686	0.0335362
P42766	RPL35	60S ribosomal protein L35	0.00332737	0.925104	0.0338094
Q14980	NUMA1	Nuclear mitotic apparatus protein 1	0.00191951	0.924675	0.0340109
P36269	GGT5	Gamma-glutamyltransferase 5	-0.00156545	0.921309	0.0355949
Q9HBR0	SLC38A10	Putative sodium-coupled neutral amino acid transporter 10	0.00369184	0.92116	0.035665
Q9Y4F1	FARP1	FERM, RhoGEF and pleckstrin domain-containing protein 1	-0.00701591	0.919943	0.0362391
P19237	TNNI1	Troponin I, slow skeletal muscle	-0.0012656	0.919508	0.0364443
E9PAV3	NACA	Nascent polypeptide-associated complex subunit alpha, muscle-specific form	0.00127821	0.919301	0.0365422
P18859	ATP5J	ATP synthase-coupling factor 6, mitochondrial	0.00454479	0.919118	0.036629
Q96C01	FAM136A	Protein FAM136A	0.00797885	0.918695	0.0368285
Q92734	TFG	Protein TFG	-0.0032369	0.918346	0.0369936
P08574	CYC1	Cytochrome c1, heme protein, mitochondrial	-0.00260802	0.917991	0.0371616
P61201	COPS2	COP9 signalosome complex subunit 2	0.00258871	0.917553	0.0373688
P61011	SRP54	Signal recognition particle 54 kDa protein	0.00153669	0.917106	0.0375803
O95571	ETHE1	Persulfide dioxygenase ETHE1, mitochondrial	-0.00630496	0.916629	0.0378065
P09543	CNP	2,3-cyclic-nucleotide 3-phosphodiesterase	-0.000967547	0.916269	0.0379769
Q9NRP0	OSTC	Oligosaccharyltransferase complex subunit OSTC	-0.000552724	0.916061	0.0380758
P39023	RPL3	60S ribosomal protein L3	-0.00156532	0.915815	0.0381924
Q9BV86	NTMT1	N-terminal Xaa-Pro-Lys N-methyltransferase 1	0.00712412	0.915789	0.0382047
O15372	EIF3H	Eukaryotic translation initiation factor 3 subunit H	-0.00142875	0.915302	0.0384355
O96008	TOMM40	Mitochondrial import receptor subunit TOM40 homolog	-0.0022376	0.914975	0.0385907
O43290	SART1	U4/U6.U5 tri-snRNP-associated protein 1	0.00358722	0.914235	0.0389422
P09668	CTSH	Pro-cathepsin H	-0.00556403	0.91398	0.0390632
P55036	PSMD4	26S proteasome non-ATPase regulatory subunit 4	0.00100472	0.912757	0.039645
O95479	H6PD	GDH/6PGL endoplasmic bifunctional protein	0.0019572	0.912742	0.0396519
P17813	ENG	Endoglin	-0.00284409	0.912645	0.0396981
P48739	PITPNB	Phosphatidylinositol transfer protein beta isoform	-0.00610599	0.912096	0.0399595
P11387	TOP1	DNA topoisomerase 1	0.00586338	0.911279	0.0403484
O00462	MANBA	Beta-mannosidase	0.0077982	0.911105	0.0404314
Q9BY44	EIF2A	Eukaryotic translation initiation factor 2A	0.00312277	0.911003	0.0404801
P51398	DAP3	28S ribosomal protein S29, mitochondrial	-0.00663837	0.91092	0.0405197
P61019	RAB2A	Ras-related protein Rab-2A	0.00082369	0.910261	0.0408341
O60749	SNX2	Sorting nexin-2	0.00436102	0.909366	0.0412614
Q96CW1	AP2M1	AP-2 complex subunit mu	-0.00124969	0.908956	0.0414569
Q5VYK3	ECM29	Proteasome-associated protein ECM29 homolog	-0.0018058	0.908507	0.0416716
Q8TED0	UTP15	U3 small nucleolar RNA-associated protein 15 homolog	0.0073784	0.906705	0.0425341
Q06210	GFPT1	Glutamine--fructose-6-phosphate aminotransferase [isomerizing] 1	-0.00274308	0.906213	0.0427697
Q9Y608	LRRFIP2	Leucine-rich repeat flightless-interacting protein 2	-0.00686938	0.905612	0.043058
P08572	COL4A2	Collagen alpha-2(IV) chain	0.00645987	0.904209	0.043731
O75746	SLC25A12	Calcium-binding mitochondrial carrier protein Aralar1	-0.00190745	0.904034	0.0438152
Q96CT7	CCDC124	Coiled-coil domain-containing protein 124	0.0018203	0.903704	0.0439738
Q9UPY8	MAPRE3	Microtubule-associated protein RP/EB family member 3	-0.00170176	0.903669	0.0439904
Q96CG8	CTHRC1	Collagen triple helix repeat-containing protein 1	-0.00830427	0.902905	0.0443578
Q14938	NFIX	Nuclear factor 1 X-type	0.00844499	0.901866	0.0448578
Q9H492	MAP1LC3A	Microtubule-associated proteins 1A/1B light chain 3A	0.00709845	0.901694	0.0449409
O75489	NDUFS3	NADH dehydrogenase [ubiquinone] iron-sulfur protein 3, mitochondrial	0.00140338	0.901472	0.0450477
Q00325	SLC25A3	Phosphate carrier protein, mitochondrial	0.000884719	0.901082	0.0452356
P05204	HMGN2	High Mobility Group Nucleosomal Binding Domain 2	-0.0080462	0.900259	0.0456327
O15230	LAMA5	Laminin subunit alpha-5	-0.00718053	0.89968	0.0459118
Q7L576	CYFIP1	Cytoplasmic FMR1-interacting protein 1	-0.0012362	0.89924	0.0461243
Q5TAQ9	DCAF8	DDB1- and CUL4-associated factor 8	0.00304998	0.898986	0.0462468
Q01082	SPTBN1	Spectrin beta chain, non-erythrocytic 1	-0.00092026	0.898986	0.0462473
Q13409	DYNC1I2	Cytoplasmic dynein 1 intermediate chain 2	-0.00306145	0.898688	0.0463912
P16278	GLB1	Beta-galactosidase	-0.00268254	0.898245	0.0466053
Q6ZP82	CCDC141	Coiled-coil domain-containing protein 141	-0.00236642	0.898042	0.0467034
Q76N89	HECW1	E3 ubiquitin-protein ligase HECW1	0.00705879	0.89777	0.0468351
Q14690	PDCD11	Protein RRP5 homolog	-0.00515019	0.897748	0.0468456
Q13200	PSMD2	26S proteasome non-ATPase regulatory subunit 2	0.00108459	0.897302	0.0470615
O43809	NUDT21	Cleavage and polyadenylation specificity factor subunit 5	0.00146588	0.896734	0.0473362
Q9GZT8	NIF3L1	NIF3-like protein 1	-0.00337522	0.896607	0.0473978
P19256	CD58	Lymphocyte function-associated antigen 3	-0.0105759	0.896529	0.0474359
O75787	ATP6AP2	Renin receptor	-0.0145617	0.895146	0.0481059
P49419	ALDH7A1	Alpha-aminoadipic semialdehyde dehydrogenase	-0.00105253	0.894164	0.0485827
Q05209	PTPN12	Tyrosine-protein phosphatase non-receptor type 12	-0.0107662	0.893612	0.0488512
Q9UKM9	RALY	RNA-binding protein Raly	0.00157926	0.892633	0.049327
P27824	CANX	Calnexin	-0.000995931	0.891327	0.0499631
P38919	EIF4A3	Eukaryotic initiation factor 4A-III	-0.000893134	0.891117	0.0500654
O00231	PSMD11	26S proteasome non-ATPase regulatory subunit 11	0.00133744	0.890981	0.0501314
O60869	EDF1	Endothelial differentiation-related factor 1	0.0172995	0.890506	0.050363
P62805	HIST1H4A	Histone H4	0.00241434	0.890339	0.0504448
Q9HAV0	GNB4	Guanine nucleotide-binding protein subunit beta-4	-0.00252734	0.890276	0.0504755
P61020	RAB5B	Ras-related protein Rab-5B	-0.00084748	0.890155	0.0505346
Q15149	PLEC	Plectin	0.000487945	0.890017	0.0506019
P55786	NPEPPS	Puromycin-sensitive aminopeptidase	-0.00194649	0.890009	0.0506057
P62304	SNRPE	Small nuclear ribonucleoprotein E	0.00373756	0.889995	0.0506127
P25705	ATP5A1	ATP synthase subunit alpha, mitochondrial	0.000977757	0.889897	0.0506605
Q9HCN8	SDF2L1	Stromal cell-derived factor 2-like protein 1	-0.00893889	0.888609	0.0512892
Q9NR30	DDX21	Nucleolar RNA helicase 2	0.00195416	0.888064	0.0515558
O14958	CASQ2	Calsequestrin-2	0.00389436	0.887893	0.0516392
Q9H6U8	ALG9	Alpha-1,2-mannosyltransferase ALG9	-0.00694677	0.887526	0.0518191
Q9H0U4	RAB1B	RAB1B, Member RAS Oncogene Family	-0.00380257	0.886958	0.0520971
Q8NCC3	PLA2G15	Group XV phospholipase A2	-0.00383965	0.886474	0.0523341
Q9Y666	SLC12A7	Solute carrier family 12 member 7	0.0103718	0.886126	0.0525044
P43034	PAFAH1B1	Platelet-activating factor acetylhydrolase IB subunit alpha	-0.00458777	0.885421	0.0528504
Q9BQG0	MYBBP1A	Myb-binding protein 1A	-0.0020482	0.885385	0.0528678
O15260	SURF4	Surfeit locus protein 4	0.00222482	0.884739	0.0531846
P43155	CRAT	Carnitine O-acetyltransferase	-0.00318255	0.88295	0.0540641
Q13601	KRR1	KRR1 small subunit processome component homolog	0.00461622	0.882757	0.0541587
Q07020	RPL18	60S ribosomal protein L18	-0.00312533	0.880655	0.0551943
Q92882	OSTF1	Osteoclast-stimulating factor 1	-0.00663572	0.880432	0.055304
Q9NQ88	TIGAR	Fructose-2,6-bisphosphatase TIGAR	0.0119645	0.878394	0.0563104
Q9BWS9	CHID1	Chitinase domain-containing protein 1	-0.00339959	0.878203	0.0564052
P07951	TPM2	Tropomyosin beta chain	-0.00419053	0.878046	0.0564827
P57737	CORO7	Coronin-7	0.00205782	0.877625	0.0566913
P09972	ALDOC	Fructose-bisphosphate aldolase C	0.00268984	0.877428	0.0567885
P12694	BCKDHA	2-oxoisovalerate dehydrogenase subunit alpha, mitochondrial	0.00981062	0.876013	0.0574896
Q9C0B1	FTO	Alpha-ketoglutarate-dependent dioxygenase FTO	0.00522758	0.875508	0.0577399
O15371	EIF3D	Eukaryotic translation initiation factor 3 subunit D	-0.00315693	0.875093	0.0579457
Q96K37	SLC35E1	Solute carrier family 35 member E1	-0.0060469	0.874103	0.0584372
Q9UBI6	GNG12	Guanine nucleotide-binding protein G(I)/G(S)/G(O) subunit gamma-12	0.00297586	0.873869	0.0585535
P46087	NOP2	Probable 28S rRNA (cytosine(4447)-C(5))-methyltransferase	0.001562	0.873002	0.0589848
Q9NUQ2	AGPAT5	1-acyl-sn-glycerol-3-phosphate acyltransferase epsilon	0.00114653	0.872993	0.0589891
O95967	EFEMP2	EGF-containing fibulin-like extracellular matrix protein 2	-0.0168843	0.872784	0.0590934
O95336	PGLS	6-phosphogluconolactonase	-0.0032466	0.872689	0.0591403
O76031	CLPX	ATP-dependent Clp protease ATP-binding subunit clpX-like, mitochondrial	-0.00324455	0.871957	0.0595048
Q96EY8	MMAB	Cob(I)yrinic acid a,c-diamide adenosyltransferase, mitochondrial	-0.0106035	0.87184	0.0595632
P27487	DPP4	Dipeptidyl peptidase 4	-0.00254599	0.871294	0.0598355
Q92544	TM9SF4	Transmembrane 9 superfamily member 4	0.00259525	0.870087	0.0604376
Q14677	CLINT1	Clathrin interactor 1	0.003775	0.869701	0.0606299
Q08J23	NSUN2	tRNA (cytosine(34)-C(5))-methyltransferase	-0.0104068	0.868046	0.0614574
O76021	RSL1D1	Ribosomal L1 domain-containing protein 1	0.00322149	0.867038	0.0619619
P40121	CAPG	Macrophage-capping protein	-0.00275784	0.866818	0.0620722
O43676	NDUFB3	NADH dehydrogenase [ubiquinone] 1 beta subcomplex subunit 3	-0.00520968	0.866293	0.0623351
P15151	PVR	Poliovirus receptor	-0.00197614	0.863482	0.0637468
Q9NP74	PALMD	Palmdelphin	0.0120564	0.862913	0.0640329
Q8NBS9	TXNDC5	Thioredoxin domain-containing protein 5	-0.000820436	0.85994	0.0655318
P46977	STT3A	Dolichyl-diphosphooligosaccharide--protein glycosyltransferase subunit STT3A	0.00205129	0.859413	0.0657982
P60903	S100A10	Protein S100-A10	0.0036186	0.859147	0.0659324
P78344	EIF4G2	Eukaryotic translation initiation factor 4 gamma 2	-0.0023257	0.858941	0.0660368
O76003	GLRX3	Glutaredoxin-3	-0.0128386	0.858774	0.0661211
Q9UDW1	UQCR10	Cytochrome b-c1 complex subunit 9	0.0150786	0.858565	0.0662268
P43897	TSFM	Elongation factor Ts, mitochondrial	0.00967234	0.85856	0.0662294
P60953	CDC42	Cell division control protein 42 homolog	0.000607265	0.858143	0.0664403
P09417	QDPR	Dihydropteridine reductase	0.00592701	0.85803	0.0664978
O14735	CDIPT	CDP-diacylglycerol-inositol 3-phosphatidyltransferase	0.00998674	0.857815	0.0666062
O43708	GSTZ1	Maleylacetoacetate isomerase	-0.00435731	0.857807	0.0666105
Q5SWX8	ODR4	Protein odr-4 homolog	0.0198934	0.857347	0.0668436
Q96S66	CLCC1	Chloride channel CLIC-like protein 1	0.0112639	0.856688	0.0671772
P43307	SSR1	Translocon-associated protein subunit alpha	0.0131811	0.856589	0.0672273
P17844	DDX5	Probable ATP-dependent RNA helicase DDX5	-0.0034848	0.856359	0.0673441
Q9Y305	ACOT9	Acyl-coenzyme A thioesterase 9, mitochondrial	0.00162977	0.856308	0.0673699
P46459	NSF	Vesicle-fusing ATPase	0.00376101	0.856143	0.0674535
Q03135	CAV1	Caveolin-1	0.033673	0.855987	0.0675327
P13805	TNNT1	Troponin T, slow skeletal muscle	0.00353407	0.855623	0.0677177
P21817	RYR1	Ryanodine receptor 1	0.00340004	0.855471	0.0677946
Q8WZ42	TTN	Titin	-0.0221096	0.854834	0.0681183
Q08380	LGALS3BP	Galectin-3-binding protein	-0.00429077	0.854233	0.0684239
P52943	CRIP2	Cysteine-rich protein 2	-0.00283512	0.854195	0.0684429
Q96GQ5	C16orf58	RUS1 family protein C16orf58	-0.0129457	0.853996	0.0685441
Q15070	OXA1L	Mitochondrial inner membrane protein OXA1L	0.0116807	0.853345	0.0688751
Q9NQW7	XPNPEP1	Xaa-Pro aminopeptidase 1	0.009939	0.852836	0.0691344
Q9BV38	WDR18	WD repeat-containing protein 18	0.0176429	0.851871	0.069626
Q86Y82	STX12	Syntaxin-12	-0.00739401	0.851173	0.069982
Q9BZQ8	FAM129A	Protein Niban	-0.00792965	0.850732	0.0702075
O95747	OXSR1	Serine/threonine-protein kinase OSR1	0.00347238	0.850095	0.0705327
O14562	UBFD1	Ubiquitin domain-containing protein UBFD1	0.010989	0.849301	0.0709385
Q9NRY6	PLSCR3	Phospholipid scramblase 3	-0.0132517	0.848264	0.071469
Q9NQG5	RPRD1B	Regulation of nuclear pre-mRNA domain-containing protein 1B	0.0165418	0.848142	0.0715316
P05106	ITGB3	Integrin beta-3	0.0161453	0.847902	0.0716545
O00151	PDLIM1	PDZ and LIM domain protein 1	-0.00355	0.847093	0.072069
O94766	B3GAT3	Galactosylgalactosylxylosylprotein 3-beta-glucuronosyltransferase 3	-0.0137446	0.846184	0.0725354
P51805	PLXNA3	Plexin-A3	0.0129648	0.845444	0.0729152
P28072	PSMB6	Proteasome subunit beta type-6	-0.00166636	0.845379	0.0729488
Q9UGT4	SUSD2	Sushi domain-containing protein 2	0.00592697	0.844685	0.073305
Q9H987	SYNPO2L	Synaptopodin 2-like protein	0.00269306	0.844634	0.0733313
P54821	PRRX1	Paired mesoderm homeobox protein 1	-0.00949008	0.844057	0.0736281
P30050	RPL12	60S ribosomal protein L12	-0.00182641	0.843933	0.0736919
Q02978	SLC25A11	Mitochondrial 2-oxoglutarate/malate carrier protein	-0.00330573	0.843598	0.0738643
P24752	ACAT1	Acetyl-CoA acetyltransferase, mitochondrial	0.00205958	0.84307	0.0741363
O60506	SYNCRIP	Heterogeneous nuclear ribonucleoprotein Q	-0.00356556	0.841814	0.0747838
P30533	LRPAP1	Alpha-2-macroglobulin receptor-associated protein	0.0111598	0.841217	0.075092
Q02790	FKBP4	Peptidyl-prolyl cis-trans isomerase FKBP4	-0.00226213	0.840572	0.0754253
P26640	VARS	Valine--tRNA ligase	-0.00301095	0.839252	0.0761076
O00571	DDX3X	ATP-dependent RNA helicase DDX3X	-0.00151132	0.838928	0.0762754
P00403	MT-CO2	Cytochrome c oxidase subunit 2	-0.00344626	0.838901	0.0762893
P09493	TPM1	Tropomyosin alpha-1 chain	0.00831895	0.838332	0.0765839
Q5T653	MRPL2	39S ribosomal protein L2, mitochondrial	-0.00599958	0.838079	0.076715
O75208	COQ9	Ubiquinone biosynthesis protein COQ9, mitochondrial	-0.00586979	0.837658	0.0769335
A1A4S6	ARHGAP10	Rho GTPase-activating protein 10	0.010738	0.836929	0.0773114
Q6P1N0	CC2D1A	Coiled-coil and C2 domain-containing protein 1A	0.0162061	0.836018	0.0777845
Q86W92	PPFIBP1	Liprin-beta-1	0.00732455	0.83494	0.0783445
Q99627	COPS8	COP9 signalosome complex subunit 8	0.00443067	0.834809	0.0784127
P62424	RPL7A	60S ribosomal protein L7a	0.0039769	0.834426	0.078612
Q9UQ80	PA2G4	Proliferation-associated protein 2G4	0.00121681	0.834207	0.0787264
Q9UHV9	PFDN2	Prefoldin subunit 2	0.0132918	0.834106	0.0787788
P12074	COX6A1	Cytochrome c oxidase subunit 6A1, mitochondrial	0.00218557	0.833939	0.0788656
Q9UHG3	PCYOX1	Prenylcysteine oxidase 1	-0.0119693	0.832407	0.0796641
Q13618	CUL3	Cullin-3	0.0025325	0.832328	0.0797057
Q9Y3B7	MRPL11	39S ribosomal protein L11, mitochondrial	0.00506744	0.832235	0.0797541
Q9H9E3	COG4	Conserved oligomeric Golgi complex subunit 4	0.0362327	0.831363	0.0802095
O95870	ABHD16A	Abhydrolase domain-containing protein 16A	0.00761344	0.831321	0.0802312
Q9Y3B4	SF3B6	Splicing factor 3B subunit 6	0.00240636	0.830581	0.0806179
Q9H2M9	RAB3GAP2	Rab3 GTPase-activating protein non-catalytic subunit	0.00440267	0.828744	0.0815798
P59998	ARPC4	Actin-related protein 2/3 complex subunit 4	-0.00548881	0.827816	0.0820661
Q3MHD2	LSM12	Protein LSM12 homolog	-0.0101222	0.827634	0.0821614
O60493	SNX3	Sorting nexin-3	-0.0297073	0.826257	0.082885
Q6IAN0	DHRS7B	Dehydrogenase/reductase SDR family member 7B	0.00597838	0.826018	0.0830104
P50570	DNM2	Dynamin-2	-0.00440293	0.825814	0.0831175
O75964	ATP5L	ATP synthase subunit g, mitochondrial	-0.00184352	0.825536	0.0832642
Q6PCB7	SLC27A1	Long-chain fatty acid transport protein 1	-0.0104008	0.824013	0.0840657
O95819	MAP4K4	Mitogen-activated protein kinase kinase kinase kinase 4	-0.00729868	0.823794	0.0841815
Q13616	CUL1	Cullin-1	0.0097768	0.822799	0.0847062
Q9H857	NT5DC2	5-nucleotidase domain-containing protein 2	0.00485314	0.822433	0.0848995
Q9Y276	BCS1L	Mitochondrial chaperone BCS1	-0.0141043	0.822346	0.0849457
P23634	ATP2B4	Plasma membrane calcium-transporting ATPase 4	-0.00372006	0.82124	0.0855301
Q9UL26	RAB22A	Ras-related protein Rab-22A	-0.00325653	0.821006	0.0856534
P09669	COX6C	Cytochrome c oxidase subunit 6C	-0.00445684	0.820145	0.0861092
O43150	ASAP2	Arf-GAP with SH3 domain, ANK repeat and PH domain-containing protein 2	-0.0289078	0.820088	0.0861396
Q00587	CDC42EP1	Cdc42 effector protein 1	-0.00107061	0.819623	0.0863858
Q99700	ATXN2	Ataxin-2	-0.002699	0.819256	0.0865805
Q969H8	MYDGF	Myeloid-derived growth factor	-0.00615754	0.818744	0.0868519
P63173	RPL38	60S ribosomal protein L38	0.00802699	0.818374	0.0870482
P09601	HMOX1	Heme oxygenase 1	0.0307943	0.818265	0.0871059
Q9P2W9	STX18	Syntaxin-18	-0.0125925	0.817881	0.0873098
Q92769	HDAC2	Histone deacetylase 2	-0.0165624	0.816681	0.0879478
P00813	ADA	Adenosine deaminase	0.00274443	0.816658	0.0879598
Q96EP5	DAZAP1	DAZ-associated protein 1	-0.00495989	0.816301	0.0881494
Q99873	PRMT1	Protein arginine N-methyltransferase 1	0.00589652	0.816212	0.0881968
P05141	SLC25A5	ADP/ATP translocase 2	0.0056779	0.816163	0.0882229
Q16643	DBN1	Drebrin	-0.0040577	0.814569	0.089072
P39060	COL18A1	Collagen alpha-1(XVIII) chain	-0.016475	0.813893	0.0894327
Q9NUQ6	SPATS2L	SPATS2-like protein	-0.00374358	0.813426	0.0896819
Q5J8M3	EMC4	ER membrane protein complex subunit 4	-0.0142951	0.812541	0.0901547
P21399	ACO1	Cytoplasmic aconitate hydratase	-0.0181668	0.811462	0.0907317
Q9NX40	OCIAD1	OCIA domain-containing protein 1	0.00154964	0.810357	0.0913236
Q9BVC6	TMEM109	Transmembrane protein 109	-0.0221727	0.809169	0.0919608
Q13033	STRN3	Striatin-3	-0.00638797	0.809056	0.0920216
Q9BZE1	MRPL37	39S ribosomal protein L37, mitochondrial	0.0062646	0.808968	0.0920688
P62899	RPL31	60S ribosomal protein L31	0.00228914	0.808244	0.0924577
Q9BXK5	BCL2L13	Bcl-2-like protein 13	0.00919326	0.8081	0.092535
Q9GZZ9	UBA5	Ubiquitin-like modifier-activating enzyme 5	0.0121743	0.807877	0.0926549
P01130	LDLR	Low-density lipoprotein receptor	-0.0179188	0.807414	0.0929039
P16070	CD44	CD44 antigen	0.00327754	0.806333	0.0934854
P52594	AGFG1	Arf-GAP domain and FG repeat-containing protein 1	0.0138522	0.8062	0.0935571
O43678	NDUFA2	NADH dehydrogenase [ubiquinone] 1 alpha subcomplex subunit 2	-0.0200163	0.805502	0.0939332
P22314	UBA1	Ubiquitin-like modifier-activating enzyme 1	0.00117356	0.803074	0.0952447
P61313	RPL15	60S ribosomal protein L15	0.00520758	0.802849	0.095366
P46379	BAG6	Large proline-rich protein BAG6	0.0167164	0.80277	0.0954088
P55795	HNRNPH2	Heterogeneous nuclear ribonucleoprotein H2	-0.00277316	0.802345	0.0956386
O95182	NDUFA7	NADH dehydrogenase [ubiquinone] 1 alpha subcomplex subunit 7	0.00502204	0.802211	0.0957113
P17655	CAPN2	Calpain-2 catalytic subunit	0.00588171	0.801237	0.0962389
P40123	CAP2	Adenylyl cyclase-associated protein 2	-0.00377334	0.801179	0.0962707
P02511	CRYAB	Alpha-crystallin B chain	-0.00527779	0.800638	0.0965639
P27701	CD82	CD82 antigen	-0.0205622	0.80012	0.0968446
Q8WUW1	BRK1	Protein BRICK1	-0.0135107	0.800116	0.0968468
O94760	DDAH1	N(G),N(G)-dimethylarginine dimethylaminohydrolase 1	0.00586956	0.799212	0.0973381
Q9Y5B9	SUPT16H	FACT complex subunit SPT16	-0.00369363	0.798832	0.0975445
Q9Y520	PRRC2C	Protein PRRC2C	-0.0132886	0.798766	0.0975802
Q99538	LGMN	Legumain	-0.0134508	0.798079	0.0979542
Q9Y6M9	NDUFB9	NADH dehydrogenase [ubiquinone] 1 beta subcomplex subunit 9	-0.00200704	0.797905	0.0980486
P07858	CTSB	Cathepsin B	0.00466909	0.796433	0.0988508
P51114	FXR1	Fragile X mental retardation syndrome-related protein 1	-0.000958058	0.796307	0.0989197
P62913	RPL11	60S ribosomal protein L11	-0.00455312	0.79592	0.0991304
Q9NZB2	FAM120A	Constitutive coactivator of PPAR-gamma-like protein 1	0.00399982	0.795648	0.099279
P40616	ARL1	ADP-ribosylation factor-like protein 1	-0.00865436	0.795008	0.0996286
Q9H6V9	C2orf43	UPF0554 protein C2orf43	0.0171131	0.793484	0.100462
Q9BX40	LSM14B	Protein LSM14 homolog B	-0.0110942	0.793288	0.100569
O95197	RTN3	Reticulon-3	0.0046752	0.792875	0.100795
P46782	RPS5	40S ribosomal protein S5	-0.00228842	0.792864	0.100801
O43242	PSMD3	26S proteasome non-ATPase regulatory subunit 3	0.00295807	0.792692	0.100895
Q9NVD7	PARVA	Alpha-parvin	-0.00317327	0.792205	0.101163
Q9NZ45	CISD1	CDGSH iron-sulfur domain-containing protein 1	0.0180951	0.792098	0.101221
O95183	VAMP5	Vesicle-associated membrane protein 5	-0.0183645	0.791822	0.101372
Q15008	PSMD6	26S proteasome non-ATPase regulatory subunit 6	-0.00319836	0.791776	0.101397
P62266	RPS23	40S ribosomal protein S23	-0.0062681	0.791398	0.101605
Q9UKS6	PACSIN3	Protein kinase C and casein kinase substrate in neurons protein 3	-0.019924	0.791297	0.101661
Q9NVH1	DNAJC11	DnaJ homolog subfamily C member 11	-0.00877061	0.790916	0.10187
P35998	PSMC2	26S protease regulatory subunit 7	0.0041233	0.78998	0.102384
Q9Y696	CLIC4	Chloride intracellular channel protein 4	0.00326949	0.78904	0.102901
Q12874	SF3A3	Splicing factor 3A subunit 3	-0.0219007	0.787175	0.103929
O00410	IPO5	Importin-5	-0.00276243	0.786518	0.104291
P19105	MYL12A	Myosin regulatory light chain 12A	0.0115392	0.786511	0.104295
P11117	ACP2	Lysosomal acid phosphatase	-0.00384255	0.786243	0.104443
P53985	SLC16A1	Monocarboxylate transporter 1	-0.0171703	0.78579	0.104694
Q9P0M9	MRPL27	39S ribosomal protein L27, mitochondrial	-0.0295873	0.783688	0.105857
Q15459	SF3A1	Splicing factor 3A subunit 1	0.00259208	0.783352	0.106043
Q86UY8	NT5DC3	5-nucleotidase domain-containing protein 3	-0.0034311	0.782368	0.106589
P51665	PSMD7	26S proteasome non-ATPase regulatory subunit 7	-0.00359777	0.782105	0.106735
Q687X5	STEAP4	Metalloreductase STEAP4	0.0279441	0.781787	0.106911
P46937	YAP1	Transcriptional coactivator YAP1	0.00413236	0.781488	0.107078
O43324	EEF1E1	Eukaryotic translation elongation factor 1 epsilon-1	-0.0082404	0.780663	0.107536
Q9BU61	NDUFAF3	NADH dehydrogenase [ubiquinone] 1 alpha subcomplex assembly factor 3	-0.0204332	0.779809	0.108012
O76024	WFS1	Wolframin	-0.0120869	0.779502	0.108183
P20962	PTMS	Parathymosin	-0.0474109	0.779401	0.108239
P09486	SPARC	SPARC	0.00831166	0.77926	0.108317
P49589	CARS	Cysteine-tRNA ligase, cytoplasmic	-0.00686826	0.778936	0.108498
Q86X55	CARM1	Histone-arginine methyltransferase CARM1	-0.00583323	0.777527	0.109285
P31937	HIBADH	3-hydroxyisobutyrate dehydrogenase, mitochondrial	0.00340364	0.777305	0.109408
Q9H425	C1orf198	Uncharacterized protein C1orf198	0.0119351	0.777117	0.109514
Q13596	SNX1	Sorting nexin-1	-0.00801507	0.777049	0.109552
P09012	SNRPA	U1 small nuclear ribonucleoprotein A	0.0175987	0.776994	0.109582
P62195	PSMC5	26S protease regulatory subunit 8	0.00202072	0.776483	0.109868
Q8WUM4	PDCD6IP	Programmed cell death 6-interacting protein	-0.00408602	0.775847	0.110224
Q6NYC8	PPP1R18	Phostensin	0.00395226	0.77511	0.110637
Q9Y6H1	CHCHD2	Coiled-coil-helix-coiled-coil-helix domain-containing protein 2	0.0115816	0.774883	0.110764
P21283	ATP6V1C1	V-type proton ATPase subunit C 1	-0.0157436	0.773169	0.111725
O75629	CREG1	Protein CREG1	-0.0329253	0.773052	0.111791
O15484	CAPN5	Calpain-5	0.0139655	0.773008	0.111816
P35606	COPB2	Coatomer subunit beta	-0.00625042	0.772919	0.111866
Q9GZY8	MFF	Mitochondrial fission factor	-0.00707205	0.772218	0.11226
Q96AG4	LRRC59	Leucine-rich repeat-containing protein 59	0.00277437	0.771426	0.112706
Q92629	SGCD	Delta-sarcoglycan	0.00505389	0.770812	0.113052
A5YKK6	CNOT1	CCR4-NOT transcription complex subunit 1	-0.00967542	0.770665	0.113134
P45954	ACADSB	Short/branched chain specific acyl-CoA dehydrogenase, mitochondrial	-0.0198432	0.77032	0.113329
P15848	ARSB	Arylsulfatase B	-0.00464219	0.769117	0.114008
Q9H2U1	DHX36	ATP-dependent RNA helicase DHX36	-0.0263376	0.768867	0.114149
P33316	DUT	Deoxyuridine 5-triphosphate nucleotidohydrolase, mitochondrial	0.0079835	0.768844	0.114162
P14625	HSP90B1	Endoplasmin	0.00260121	0.768136	0.114562
P42892	ECE1	Endothelin-converting enzyme 1	0.00186719	0.767711	0.114803
P55735	SEC13	Protein SEC13 homolog	0.0125649	0.767275	0.115049
O00186	STXBP3	Syntaxin-binding protein 3	-0.0064673	0.767248	0.115064
O95470	SGPL1	Sphingosine-1-phosphate lyase 1	-0.0155469	0.766441	0.115521
Q9Y6E0	STK24	Serine/threonine-protein kinase 24	0.0183592	0.766342	0.115577
P34932	HSPA4	Heat shock 70 kDa protein 4	-0.00326646	0.766336	0.115581
P62995	TRA2B	Transformer-2 protein homolog beta	-0.0156972	0.766133	0.115696
Q9NP79	VTA1	Vacuolar protein sorting-associated protein VTA1 homolog	-0.0052072	0.765837	0.115864
Q9UIQ6	LNPEP	Leucyl-cystinyl aminopeptidase	0.021687	0.765533	0.116036
P28066	PSMA5	Proteasome subunit alpha type-5	0.00722679	0.764988	0.116345
Q9P015	MRPL15	39S ribosomal protein L15, mitochondrial	-0.00859902	0.764831	0.116434
O75381	PEX14	Peroxisomal membrane protein PEX14	0.0244954	0.764442	0.116655
Q9Y3E0	GOLT1B	Vesicle transport protein GOT1B	0.010218	0.763925	0.11695
Q96HS1	PGAM5	Serine/threonine-protein phosphatase PGAM5, mitochondrial	0.0135966	0.763014	0.117467
Q8WVC6	DCAKD	Dephospho-CoA kinase domain-containing protein	-0.0093798	0.76287	0.117549
Q9NQR4	NIT2	Omega-amidase NIT2	-0.00767193	0.762607	0.117699
P84077	ARF1	ADP-ribosylation factor 1	0.0200028	0.762583	0.117713
Q9UHQ9	CYB5R1	NADH-cytochrome b5 reductase 1	0.00273811	0.762036	0.118024
O43854	EDIL3	EGF-like repeat and discoidin I-like domain-containing protein 3	-0.0200668	0.761507	0.118326
P03928	MT-ATP8	ATP synthase protein 8	-0.0336031	0.760924	0.118658
Q53GG5	PDLIM3	PDZ and LIM domain protein 3	0.0061111	0.760605	0.118841
P62081	RPS7	40S ribosomal protein S7	0.00360373	0.760452	0.118928
P18031	PTPN1	Tyrosine-protein phosphatase non-receptor type 1	0.00581073	0.760288	0.119022
P07602	PSAP	Prosaposin	0.0056704	0.759803	0.119299
L0R6Q1	SLC35A4		-0.00799643	0.759033	0.11974
Q9Y487	ATP6V0A2	V-type proton ATPase 116 kDa subunit a isoform 2	0.00735655	0.758982	0.119769
O60645	EXOC3	Exocyst complex component 3	-0.0273919	0.758295	0.120162
P63261	ACTG1	Actin, cytoplasmic 2	0.00786961	0.757374	0.120689
Q9NPQ8	RIC8A	Synembryn-A	-0.00600669	0.757226	0.120774
O95822	MLYCD	Malonyl-CoA decarboxylase, mitochondrial	0.0113385	0.756921	0.120949
Q9Y4J8	DTNA	Dystrobrevin alpha	-0.00499469	0.75684	0.120996
Q93034	CUL5	Cullin-5	0.00236292	0.755684	0.12166
Q9Y230	RUVBL2	RuvB-like 2	0.00340184	0.755235	0.121918
Q9NYJ1	COA4	Cytochrome c oxidase assembly factor 4 homolog, mitochondrial	0.00535771	0.754745	0.1222
Q9Y5Q0	FADS3	Fatty acid desaturase 3	0.00895675	0.753919	0.122675
Q14019	COTL1	Coactosin-like protein	0.021976	0.753748	0.122774
O43395	PRPF3	U4/U6 small nuclear ribonucleoprotein Prp3	0.0107923	0.752484	0.123503
Q5SSJ5	HP1BP3	Heterochromatin protein 1-binding protein 3	0.00805087	0.752352	0.123579
P31153	MAT2A	S-adenosylmethionine synthase isoform type-2	0.00429859	0.752326	0.123594
P52597	HNRNPF	Heterogeneous nuclear ribonucleoprotein F	0.00786236	0.752053	0.123752
Q86WV6	TMEM173	Stimulator of interferon genes protein	-0.00716915	0.751948	0.123812
O94832	MYO1D	Unconventional myosin-Id	0.0104431	0.75111	0.124296
Q15843	NEDD8	NEDD8	0.00350484	0.750519	0.124638
Q9Y6Y8	SEC23IP	SEC23-interacting protein	-0.00629678	0.75049	0.124655
P61619	SEC61A1	Protein transport protein Sec61 subunit alpha isoform 1	0.00261571	0.75005	0.12491
O96011	PEX11B	Peroxisomal membrane protein 11B	0.0296924	0.750003	0.124937
Q13505	MTX1	Metaxin-1	-0.037136	0.749958	0.124963
Q9Y5K5	UCHL5	Ubiquitin carboxyl-terminal hydrolase isozyme L5	-0.014768	0.749916	0.124988
Q96A32	MYLPF	Myosin regulatory light chain 2, skeletal muscle isoform	0.0158631	0.749887	0.125004
P06753	TPM3	Tropomyosin alpha-3 chain	0.00883941	0.749684	0.125121
O75531	BANF1	Barrier-to-autointegration factor	-0.00599456	0.749424	0.125273
Q9Y263	PLAA	Phospholipase A-2-activating protein	0.0106873	0.748729	0.125675
Q8NFH5	NUP35	Nucleoporin NUP53	-0.00756508	0.748408	0.125862
Q9H8H0	NOL11	Nucleolar protein 11	0.0169396	0.74757	0.126348
Q6QEF8	CORO6	Coronin-6	-0.00628319	0.747031	0.126661
Q9UN42	ATP1B4	Protein ATP1B4	0.00608973	0.746747	0.126826
Q13740	ALCAM	CD166 antigen	-0.00766626	0.745772	0.127394
Q53H12	AGK	Acylglycerol kinase, mitochondrial	0.00839955	0.745451	0.127581
Q5T160	RARS2	Probable arginine--tRNA ligase, mitochondrial	0.0117127	0.744611	0.12807
Q8NE86	MCU	Calcium uniporter protein, mitochondrial	0.00583947	0.744411	0.128187
Q5JPE7	NOMO2	Nodal modulator 2	0.00375575	0.744001	0.128426
P04632	CAPNS1	Calpain small subunit 1	-0.00692534	0.74379	0.12855
P12107	COL11A1	Collagen alpha-1(XI) chain	0.0133882	0.743604	0.128658
Q9NZI8	IGF2BP1	Insulin-like growth factor 2 mRNA-binding protein 1	-0.0192755	0.743574	0.128676
P62249	RPS16	40S ribosomal protein S16	-0.00203314	0.742398	0.129363
Q8NI60	ADCK3	Atypical kinase ADCK3, mitochondrial	0.0250554	0.74066	0.130381
Q7LGA3	HS2ST1	Heparan sulfate 2-O-sulfotransferase 1	0.0042662	0.739953	0.130796
Q9UMS6	SYNPO2	Synaptopodin-2	-0.00523089	0.738617	0.131581
Q13177	PAK2	Serine/threonine-protein kinase PAK 2	0.0165807	0.73824	0.131803
P04062	GBA	Glucosylceramidase	-0.00840079	0.737874	0.132018
Q01995	TAGLN	Transgelin	-0.00736805	0.737788	0.132069
Q9UBF9	MYOT	Myotilin	0.00942956	0.737714	0.132112
P35232	PHB	Prohibitin	0.00521226	0.737573	0.132195
P56378	MP68	6.8 kDa mitochondrial proteolipid	-0.0153514	0.73743	0.132279
P51610	HCFC1	Host cell factor 1	0.0297857	0.736982	0.132543
P13726	F3	Tissue factor	0.0154388	0.736487	0.132835
Q8IUX7	AEBP1	Adipocyte enhancer-binding protein 1	-0.0377098	0.736432	0.132867
Q9UGP8	SEC63	Translocation protein SEC63 homolog	0.0057562	0.736389	0.132893
P62330	ARF6	ADP-ribosylation factor 6	-0.0085371	0.735536	0.133396
P58335	ANTXR2	Anthrax toxin receptor 2	0.00917165	0.73506	0.133677
Q99523	SORT1	Sortilin	0.00566265	0.734493	0.134012
Q5JTH9	RRP12	RRP12-like protein	0.00479919	0.734462	0.134031
O75340	PDCD6	Programmed cell death protein 6	0.0102906	0.734441	0.134043
Q10471	GALNT2	Polypeptide N-acetylgalactosaminyltransferase 2	0.00815034	0.734381	0.134078
P63000	RAC1	Ras-related C3 botulinum toxin substrate 1	0.00884751	0.734141	0.13422
O15145	ARPC3	Actin-related protein 2/3 complex subunit 3	0.0102094	0.733564	0.134562
P08240	SRPR	Signal recognition particle receptor subunit alpha	-0.0013273	0.732806	0.135011
Q8IWX7	UNC45B	Protein unc-45 homolog B	-0.00633613	0.731802	0.135606
P56199	ITGA1	Integrin alpha-1	-0.00559879	0.73118	0.135976
P78417	GSTO1	Glutathione S-transferase omega-1	-0.0181851	0.730771	0.136219
P35241	RDX	Radixin	-0.00613091	0.728226	0.137734
P61088	UBE2N	Ubiquitin-conjugating enzyme E2 N	0.0424475	0.728174	0.137765
Q8TDQ7	GNPDA2	Glucosamine-6-phosphate isomerase 2	-0.0253753	0.727983	0.137879
P11717	IGF2R	Cation-independent mannose-6-phosphate receptor	0.00459334	0.727934	0.137908
Q9BRG1	VPS25	Vacuolar protein-sorting-associated protein 25	0.0101926	0.726126	0.138988
P35573	AGL	Glycogen debranching enzyme	-0.030382	0.725735	0.139222
O95295	SNAPIN	SNARE-associated protein Snapin	-0.0402312	0.725638	0.13928
O75934	BCAS2	Pre-mRNA-splicing factor SPF27	-0.00658159	0.725561	0.139326
Q13418	ILK	Integrin-linked protein kinase	0.00358163	0.725432	0.139403
Q9HD26	GOPC	Golgi-associated PDZ and coiled-coil motif-containing protein	0.00920951	0.724447	0.139993
Q99471	PFDN5	Prefoldin subunit 5	-0.031799	0.723778	0.140395
Q6NVY1	HIBCH	3-hydroxyisobutyryl-CoA hydrolase, mitochondrial	0.00106888	0.723059	0.140827
P21810	BGN	Biglycan	0.0126327	0.722746	0.141014
O15144	ARPC2	Actin-related protein 2/3 complex subunit 2	0.00733991	0.7224	0.141222
P29992	GNA11	Guanine nucleotide-binding protein subunit alpha-11	0.00705587	0.722281	0.141294
P08708	RPS17	40S ribosomal protein S17	-0.00596289	0.721878	0.141536
P18077	RPL35A	60S ribosomal protein L35a	-0.00900858	0.719278	0.143103
Q16586	SGCA	Alpha-sarcoglycan	-0.00555688	0.718824	0.143378
P62917	RPL8	60S ribosomal protein L8	0.00699636	0.718644	0.143486
Q9ULV4	CORO1C	Coronin-1C	0.0038216	0.717734	0.144037
Q13439	GOLGA4	Golgin subfamily A member 4	-0.0108264	0.716999	0.144482
O95425	SVIL	Supervillin	-0.00821822	0.716404	0.144842
Q92974	ARHGEF2	Rho guanine nucleotide exchange factor 2	-0.00478363	0.715352	0.14548
Q00839	HNRNPU	Heterogeneous nuclear ribonucleoprotein U	0.00638004	0.715317	0.145502
Q96RQ3	MCCC1	Methylcrotonoyl-CoA carboxylase subunit alpha, mitochondrial	0.00798135	0.71525	0.145542
Q96HH9	GRAMD3	GRAM domain-containing protein 3	-0.0227127	0.714765	0.145836
Q9Y3T9	NOC2L	Nucleolar complex protein 2 homolog	-0.0279612	0.713879	0.146375
Q9UBU9	NXF1	Nuclear RNA export factor 1	0.0203296	0.71319	0.146795
Q9Y5M8	SRPRB	Signal recognition particle receptor subunit beta	0.0127404	0.71314	0.146825
Q9BYV6	TRIM55	Tripartite motif-containing protein 55	-0.044989	0.712195	0.147401
Q9BYD3	MRPL4	39S ribosomal protein L4, mitochondrial	-0.010942	0.711759	0.147667
P60866	RPS20	40S ribosomal protein S20	0.00443146	0.710864	0.148214
P14174	MIF	Macrophage migration inhibitory factor	0.00615506	0.71002	0.148729
Q08170	SRSF4	Serine/arginine-rich splicing factor 4	0.00565608	0.709713	0.148917
P57088	TMEM33	Transmembrane protein 33	-0.00505734	0.709557	0.149013
P61970	NUTF2	Nuclear transport factor 2	0.0255663	0.709094	0.149296
P14854	COX6B1	Cytochrome c oxidase subunit 6B1	-0.00098363	0.707843	0.150063
P05387	RPLP2	60S acidic ribosomal protein P2	-0.0182833	0.707714	0.150142
Q15847	ADIRF	Adipogenesis regulatory factor	0.0531534	0.707021	0.150568
Q9H061	TMEM126A	Transmembrane protein 126A	0.0189543	0.706711	0.150758
Q16630	CPSF6	Cleavage and polyadenylation specificity factor subunit 6	-0.0170008	0.706327	0.150994
Q9NZJ7	MTCH1	Mitochondrial carrier homolog 1	-0.0268832	0.706317	0.151
Q9H074	PAIP1	Polyadenylate-binding protein-interacting protein 1	-0.0361024	0.704985	0.15182
Q07955	SRSF1	Serine/arginine-rich splicing factor 1	-0.00538668	0.704963	0.151834
Q9P032	NDUFAF4	NADH dehydrogenase [ubiquinone] 1 alpha subcomplex assembly factor 4	-0.0235856	0.704919	0.15186
P46779	RPL28	60S ribosomal protein L28	-0.00931629	0.703763	0.152574
P30084	ECHS1	Enoyl-CoA hydratase, mitochondrial	0.00613614	0.703703	0.152611
Q9H583	HEATR1	HEAT repeat-containing protein 1	-0.023842	0.703474	0.152752
P35268	RPL22	60S ribosomal protein L22	0.00531468	0.703328	0.152842
P16234	PDGFRA	Platelet-derived growth factor receptor alpha	0.0279061	0.702427	0.153399
P15586	GNS	N-acetylglucosamine-6-sulfatase	0.00482471	0.702129	0.153583
Q92896	GLG1	Golgi apparatus protein 1	0.0045574	0.70099	0.154288
P17980	PSMC3	26S protease regulatory subunit 6A	0.00628477	0.700988	0.154289
Q70E73	RAPH1	Ras-associated and pleckstrin homology domains-containing protein 1	0.0265629	0.700453	0.154621
Q3ZCM7	TUBB8	Tubulin beta-8 chain	-0.0117218	0.699807	0.155022
O95758	PTBP3	Polypyrimidine tract-binding protein 3	-0.0262688	0.698902	0.155584
Q9NVA1	UQCC1	Ubiquinol-cytochrome-c reductase complex assembly factor 1	0.0223525	0.697555	0.156422
P08238	HSP90AB1	Heat shock protein HSP 90-beta	-0.00338517	0.697532	0.156436
P06748	NPM1	Nucleophosmin	0.00526389	0.696935	0.156808
P42785	PRCP	Lysosomal Pro-X carboxypeptidase	0.00888456	0.696871	0.156847
O43920	NDUFS5	NADH dehydrogenase [ubiquinone] iron-sulfur protein 5	0.0325375	0.695854	0.157482
P16435	POR	NADPH--cytochrome P450 reductase	-0.00319921	0.694481	0.158339
P53396	ACLY	ATP-citrate synthase	-0.00633577	0.694293	0.158457
Q5HYI7	MTX3	Metaxin-3	0.0204156	0.693649	0.15886
Q96AC1	FERMT2	Fermitin family homolog 2	0.00495396	0.692201	0.159768
Q13884	SNTB1	Beta-1-syntrophin	0.00832275	0.692156	0.159796
P49773	HINT1	Histidine triad nucleotide-binding protein 1	0.00901857	0.690985	0.160531
Q6NUQ4	TMEM214	Transmembrane protein 214	0.00788216	0.690238	0.161001
Q15369	TCEB1	Transcription elongation factor B polypeptide 1	-0.00722793	0.689899	0.161214
Q03518	TAP1	Antigen peptide transporter 1	0.0251697	0.689827	0.16126
Q702N8	XIRP1	Xin actin-binding repeat-containing protein 1	0.00327808	0.689217	0.161644
Q9NYK5	MRPL39	39S ribosomal protein L39, mitochondrial	0.00477791	0.688345	0.162194
Q09028	RBBP4	Histone-binding protein RBBP4	-0.0109486	0.688148	0.162318
Q7Z434	MAVS	Mitochondrial antiviral-signaling protein	-0.0189191	0.687949	0.162444
P07741	APRT	Adenine phosphoribosyltransferase	0.0181039	0.687677	0.162615
Q8N0U8	VKORC1L1	Vitamin K epoxide reductase complex subunit 1-like protein 1	-0.00535386	0.687656	0.162629
Q07021	C1QBP	Complement component 1 Q subcomponent-binding protein, mitochondrial	-0.0357815	0.686646	0.163267
Q9BR76	CORO1B	Coronin-1B	0.0127181	0.685975	0.163692
O43390	HNRNPR	Heterogeneous nuclear ribonucleoprotein R	0.00330537	0.685784	0.163812
P24821	TNC	Tenascin	0.0247192	0.685381	0.164068
Q92538	GBF1	Golgi-specific brefeldin A-resistance guanine nucleotide exchange factor 1	-0.00784192	0.685197	0.164184
Q9BTV4	TMEM43	Transmembrane protein 43	0.00347798	0.684819	0.164424
P17050	NAGA	Alpha-N-acetylgalactosaminidase	0.0248761	0.684274	0.16477
Q05707	COL14A1	Collagen alpha-1(XIV) chain	0.0132215	0.683478	0.165276
Q92930	RAB8B	Ras-related protein Rab-8B	-0.00549892	0.682572	0.165851
Q96EY1	DNAJA3	DnaJ homolog subfamily A member 3, mitochondrial	0.0102118	0.682435	0.165939
P15311	EZR	Ezrin	0.0301984	0.682435	0.165939
P50993	ATP1A2	Sodium/potassium-transporting ATPase subunit alpha-2	0.00992308	0.682115	0.166143
Q9BWH2	FUNDC2	FUN14 domain-containing protein 2	-0.0157509	0.681837	0.16632
O00754	MAN2B1	Lysosomal alpha-mannosidase	0.00493063	0.681127	0.166772
Q9NP72	RAB18	Ras-related protein Rab-18	-0.00253017	0.680704	0.167041
P30041	PRDX6	Peroxiredoxin-6	0.00710522	0.680153	0.167393
Q96QK1	VPS35	Vacuolar protein sorting-associated protein 35	-0.00397448	0.679614	0.167738
Q9Y221	NIP7	60S ribosome subunit biogenesis protein NIP7 homolog	0.00968001	0.679607	0.167742
P27797	CALR	Calreticulin	0.00983442	0.679348	0.167908
P61604	HSPE1	10 kDa heat shock protein, mitochondrial	-0.0117974	0.677206	0.169279
Q7Z7M9	GALNT5	Polypeptide N-acetylgalactosaminyltransferase 5	-0.0319902	0.677017	0.1694
P78362	SRPK2	SRSF protein kinase 2	0.0130738	0.676589	0.169675
P22033	MUT	Methylmalonyl-CoA mutase, mitochondrial	0.00481411	0.676387	0.169804
P47985	UQCRFS1	Cytochrome b-c1 complex subunit Rieske, mitochondrial	0.0128083	0.675092	0.170637
P12236	SLC25A6	ADP/ATP translocase 3	-0.00683092	0.675001	0.170696
P49207	RPL34	60S ribosomal protein L34	-0.0526555	0.674925	0.170744
O75874	IDH1	Isocitrate dehydrogenase [NADP] cytoplasmic	-0.00651405	0.674891	0.170767
O95319	CELF2	CUGBP Elav-like family member 2	-0.0161964	0.673171	0.171875
P55265	ADAR	Double-stranded RNA-specific adenosine deaminase	0.0174154	0.673033	0.171964
Q02878	RPL6	60S ribosomal protein L6	-0.00172967	0.673028	0.171967
Q00688	FKBP3	Peptidyl-prolyl cis-trans isomerase FKBP3	-0.00723985	0.672794	0.172118
Q02127	DHODH	Dihydroorotate dehydrogenase (quinone), mitochondrial	-0.0099777	0.672512	0.1723
P10606	COX5B	Cytochrome c oxidase subunit 5B, mitochondrial	0.00436092	0.67167	0.172844
Q9UM22	EPDR1	Mammalian ependymin-related protein 1	-0.0561435	0.671582	0.172901
Q96LJ7	DHRS1	Dehydrogenase/reductase SDR family member 1	0.0238169	0.671446	0.172989
P48643	CCT5	T-complex protein 1 subunit epsilon	-0.0071341	0.671307	0.173079
P06732	CKM	Creatine kinase M-type	-0.0109367	0.671013	0.173269
P50416	CPT1A	Carnitine O-palmitoyltransferase 1, liver isoform	-0.0190843	0.670947	0.173312
Q8IYU8	MICU2	Calcium uptake protein 2, mitochondrial	0.0163268	0.669016	0.174563
P36542	ATP5C1	ATP synthase subunit gamma, mitochondrial	0.00767912	0.668997	0.174576
P09497	CLTB	Clathrin light chain B	0.0090454	0.668496	0.174901
P49189	ALDH9A1	4-trimethylaminobutyraldehyde dehydrogenase	0.00294937	0.66796	0.17525
Q92597	NDRG1	Protein NDRG1	-0.0125937	0.667727	0.175401
O95299	NDUFA10	NADH dehydrogenase [ubiquinone] 1 alpha subcomplex subunit 10, mitochondrial	0.00584013	0.667352	0.175645
P48723	HSPA13	Heat shock 70 kDa protein 13	-0.0480986	0.666813	0.175996
O75348	ATP6V1G1	V-type proton ATPase subunit G 1	0.00491391	0.666718	0.176058
P20618	PSMB1	Proteasome subunit beta type-1	0.00337515	0.666031	0.176505
P00167	CYB5A	Cytochrome b5	0.00979262	0.665573	0.176805
Q9H019	MTFR1L	Mitochondrial fission regulator 1-like	0.00996736	0.665326	0.176966
Q71UI9	H2AFZ	Histone H2A.Z	0.00473682	0.664817	0.177298
Q9Y617	PSAT1	Phosphoserine aminotransferase	-0.0132211	0.663774	0.17798
Q12981	BNIP1	Vesicle transport protein SEC20	0.0346657	0.662454	0.178844
Q7L1Q6	BZW1	Basic leucine zipper and W2 domain-containing protein 1	-0.035616	0.662376	0.178895
P56385	ATP5I	ATP synthase subunit e, mitochondrial	-0.00339412	0.662242	0.178983
Q07065	CKAP4	Cytoskeleton-associated protein 4	0.00353956	0.66126	0.179628
Q05519	SRSF11	Serine/arginine-rich splicing factor 11	-0.0305746	0.661107	0.179728
Q9Y5Y2	NUBP2	Cytosolic Fe-S cluster assembly factor NUBP2	-0.0268425	0.660829	0.179911
Q6UW68	TMEM205	Transmembrane protein 205	0.00985561	0.660332	0.180238
Q9BV73	CEP250	Centrosome-associated protein CEP250	0.024872	0.65998	0.180469
Q5W111	SPRYD7	SPRY domain-containing protein 7	-0.0397668	0.659727	0.180636
Q9Y3U8	RPL36	60S ribosomal protein L36	-0.0102604	0.658754	0.181277
P31939	ATIC	Bifunctional purine biosynthesis protein PURH	-0.00849788	0.658606	0.181374
Q9Y5K8	ATP6V1D	V-type proton ATPase subunit D	0.00496237	0.658132	0.181687
P54687	BCAT1	Branched-chain-amino-acid aminotransferase, cytosolic	0.00845601	0.65797	0.181794
Q96AE4	FUBP1	Far upstream element-binding protein 1	-0.0152432	0.657734	0.181949
Q09666	AHNAK	Neuroblast differentiation-associated protein AHNAK	0.00443895	0.65771	0.181966
P20073	ANXA7	Annexin A7	0.0127925	0.657113	0.18236
O15498	YKT6	Synaptobrevin homolog YKT6	0.0282921	0.656868	0.182522
Q96HE7	ERO1L	ERO1-like protein alpha	-0.037058	0.65673	0.182613
P51116	FXR2	Fragile X mental retardation syndrome-related protein 2	-0.0088589	0.656329	0.182879
Q92520	FAM3C	Protein FAM3C	0.00683928	0.654211	0.184282
Q96QR8	PURB	Transcriptional activator protein Pur-beta	0.00635223	0.653774	0.184572
O95881	TXNDC12	Thioredoxin domain-containing protein 12	-0.0101041	0.653288	0.184895
P32119	PRDX2	Peroxiredoxin-2	-0.0229314	0.653059	0.185047
Q70UQ0	IKBIP	Inhibitor of nuclear factor kappa-B kinase-interacting protein	-0.00876178	0.652891	0.185159
P45379	TNNT2	Troponin T, cardiac muscle	0.00551872	0.651463	0.18611
Q15404	RSU1	Ras suppressor protein 1	-0.0184336	0.651008	0.186414
Q9UNM6	PSMD13	26S proteasome non-ATPase regulatory subunit 13	0.00807318	0.650719	0.186606
Q8N3C0	ASCC3	Activating signal cointegrator 1 complex subunit 3	0.0134823	0.650547	0.186721
P83731	RPL24	60S ribosomal protein L24	-0.02031	0.64931	0.187548
P12882	MYH1	Myosin-1	-0.00471233	0.648714	0.187947
Q13813	SPTAN1	Spectrin alpha chain, non-erythrocytic 1	-0.00945095	0.64756	0.18872
Q9P0L0	VAPA	Vesicle-associated membrane protein-associated protein A	-0.00932943	0.647251	0.188928
P08648	ITGA5	Integrin alpha-5	-0.00421513	0.647232	0.18894
Q6Y7W6	GIGYF2	PERQ amino acid-rich with GYF domain-containing protein 2	0.0215834	0.646345	0.189535
Q86TX2	ACOT1	Acyl-coenzyme A thioesterase 1	0.00445906	0.644787	0.190584
Q02880	TOP2B	DNA topoisomerase 2-beta	-0.0163181	0.644618	0.190698
P51648	ALDH3A2	Fatty aldehyde dehydrogenase	-0.0168043	0.643736	0.191292
O96019	ACTL6A	Actin-like protein 6A	0.0103473	0.643633	0.191361
P24534	EEF1B2	Elongation factor 1-beta	-0.00922577	0.643071	0.191741
Q69YQ0	SPECC1L	Cytospin-A	0.0238939	0.642617	0.192047
P49750	YLPM1	YLP motif-containing protein 1	0.0365755	0.642484	0.192137
P62753	RPS6	40S ribosomal protein S6	-0.0153171	0.642285	0.192272
Q9Y2H5	PLEKHA6	Pleckstrin homology domain-containing family A member 6	0.045148	0.641788	0.192609
Q9NP81	SARS2	Serine--tRNA ligase, mitochondrial	0.00649429	0.64149	0.19281
P34949	MPI	Mannose-6-phosphate isomerase	-0.00950721	0.64135	0.192905
Q92688	ANP32B	Acidic leucine-rich nuclear phosphoprotein 32 family member B	-0.011397	0.641341	0.192911
O95817	BAG3	BAG family molecular chaperone regulator 3	-0.0130594	0.640605	0.19341
P09936	UCHL1	Ubiquitin carboxyl-terminal hydrolase isozyme L1	0.00880897	0.640437	0.193524
Q9BXF6	RAB11FIP5	Rab11 family-interacting protein 5	0.0110215	0.64043	0.193529
Q8TCC3	MRPL30	39S ribosomal protein L30, mitochondrial	0.0149717	0.639864	0.193913
O43813	LANCL1	LanC-like protein 1	-0.0180036	0.639489	0.194167
P07237	P4HB	Protein disulfide-isomerase	-0.00759221	0.639415	0.194217
Q92947	GCDH	Glutaryl-CoA dehydrogenase, mitochondrial	0.00499174	0.639262	0.194321
Q92499	DDX1	ATP-dependent RNA helicase DDX1	0.00394976	0.638998	0.1945
Q9Y3C1	NOP16	Nucleolar protein 16	-0.025605	0.638856	0.194597
Q15370	TCEB2	Transcription elongation factor B polypeptide 2	0.040272	0.638639	0.194745
P36578	RPL4	60S ribosomal protein L4	0.00570815	0.637768	0.195337
P47914	RPL29	60S ribosomal protein L29	-0.0124105	0.637651	0.195417
P55209	NAP1L1	Nucleosome assembly protein 1-like 1	0.0217373	0.637418	0.195576
Q99439	CNN2	Calponin-2	-0.00276414	0.637339	0.195629
P06753	TPM3	Tropomyosin alpha-3 chain	-0.014221	0.637078	0.195808
O15126	SCAMP1	Secretory carrier-associated membrane protein 1	0.00516641	0.636799	0.195997
Q13045	FLII	Protein flightless-1 homolog	0.00525352	0.636622	0.196118
P62263	RPS14	40S ribosomal protein S14	-0.00706838	0.636563	0.196159
Q9UBQ0	VPS29	Vacuolar protein sorting-associated protein 29	0.0307598	0.636553	0.196165
P35442	THBS2	Thrombospondin-2	-0.0299399	0.636274	0.196355
P52306	RAP1GDS1	Rap1 GTPase-GDP dissociation stimulator 1	0.0183629	0.63607	0.196495
P07099	EPHX1	Epoxide hydrolase 1	-0.00749149	0.635709	0.196742
Q02543	RPL18A	60S ribosomal protein L18a	-0.00735065	0.635584	0.196827
P13807	GYS1	Glycogen [starch] synthase, muscle	0.0103358	0.635543	0.196855
P07204	THBD	Thrombomodulin	-0.0513303	0.634727	0.197413
O75436	VPS26A	Vacuolar protein sorting-associated protein 26A	0.0164313	0.634401	0.197636
P09651	HNRNPA1	Heterogeneous nuclear ribonucleoprotein A1	0.00410048	0.634099	0.197843
P18621	RPL17	60S ribosomal protein L17	-0.0057181	0.633943	0.19795
Q14683	SMC1A	Structural maintenance of chromosomes protein 1A	-0.0169775	0.633598	0.198186
Q9NZ01	TECR	Very-long-chain enoyl-CoA reductase	0.00635665	0.633249	0.198425
Q9HAV7	GRPEL1	GrpE protein homolog 1, mitochondrial	0.0126749	0.633044	0.198566
Q92879	CELF1	CUGBP Elav-like family member 1	-0.0180617	0.632735	0.198778
Q92665	MRPS31	28S ribosomal protein S31, mitochondrial	0.0127961	0.632371	0.199028
O15127	SCAMP2	Secretory carrier-associated membrane protein 2	0.011567	0.631367	0.199718
Q9Y2V2	CARHSP1	Calcium-regulated heat stable protein 1	-0.0230419	0.631119	0.199889
Q13610	PWP1	Periodic tryptophan protein 1 homolog	0.0527958	0.630885	0.20005
P26368	U2AF2	Splicing factor U2AF 65 kDa subunit	0.00512336	0.630172	0.200541
P31946	YWHAB	14-3-3 protein beta/alpha	0.00725102	0.630106	0.200586
Q92614	MYO18A	Unconventional myosin-XVIIIa	0.00685095	0.629663	0.200892
Q96T51	RUFY1	RUN and FYVE domain-containing protein 1	0.0244915	0.628812	0.201479
Q8N1F7	NUP93	Nuclear pore complex protein Nup93	0.0376461	0.627556	0.202348
O95865	DDAH2	N(G),N(G)-dimethylarginine dimethylaminohydrolase 2	0.0119654	0.62658	0.203024
O43396	TXNL1	Thioredoxin-like protein 1	-0.0403228	0.625587	0.203712
O94929	ABLIM3	Actin-binding LIM protein 3	0.00789395	0.624808	0.204253
P60981	DSTN	Destrin	-0.00770062	0.624782	0.204271
P17174	GOT1	Aspartate aminotransferase, cytoplasmic	-0.00821362	0.624626	0.20438
Q9Y3I0	RTCB	tRNA-splicing ligase RtcB homolog	0.00779196	0.624088	0.204754
O94901	SUN1	SUN domain-containing protein 1	0.00982967	0.623686	0.205034
Q9UQ35	SRRM2	Serine/arginine repetitive matrix protein 2	0.0112548	0.623073	0.205461
Q9Y2G5	POFUT2	GDP-fucose protein O-fucosyltransferase 2	0.0439326	0.622956	0.205543
Q13442	PDAP1	28 kDa heat- and acid-stable phosphoprotein	-0.0320833	0.621982	0.206222
Q96S59	RANBP9	Ran-binding protein 9	-0.0703334	0.621633	0.206466
Q9NQ55	PPAN	Suppressor of SWI4 1 homolog	0.0245271	0.619855	0.20771
P55769	NHP2L1	NHP2-like protein 1	0.0121156	0.619413	0.20802
Q9UJS0	SLC25A13	Calcium-binding mitochondrial carrier protein Aralar2	0.0111668	0.619323	0.208083
Q9UBQ5	EIF3K	Eukaryotic translation initiation factor 3 subunit K	0.0265208	0.618533	0.208637
P52888	THOP1	Thimet oligopeptidase	-0.0431148	0.618436	0.208705
Q00059	TFAM	Transcription factor A, mitochondrial	0.0161883	0.618342	0.208771
Q8TCT8	SPPL2A	Signal peptide peptidase-like 2A	0.0170707	0.616646	0.209964
P22830	FECH	Ferrochelatase, mitochondrial	0.051351	0.615308	0.210907
P18206	VCL	Vinculin	0.00357433	0.614945	0.211164
Q9NR56	MBNL1	Muscleblind-like protein 1	0.00607885	0.61471	0.21133
P56537	EIF6	Eukaryotic translation initiation factor 6	0.0102519	0.614252	0.211654
Q15942	ZYX	Zyxin	-0.00768617	0.614102	0.211759
P09429	HMGB1	High mobility group protein B1	0.0137058	0.614014	0.211822
Q14011	CIRBP	Cold-inducible RNA-binding protein	0.0142992	0.613662	0.212071
Q16186	ADRM1	Proteasomal ubiquitin receptor ADRM1	0.00727108	0.611322	0.21373
Q9GZR7	DDX24	ATP-dependent RNA helicase DDX24	-0.041525	0.611124	0.213871
Q9UQ03	CORO2B	Coronin-2B	0.040454	0.610702	0.214171
Q9P035	HACD3	Very-long-chain (3R)-3-hydroxyacyl-CoA dehydratase 3	-0.0219672	0.608955	0.215415
Q9HDC9	APMAP	Adipocyte plasma membrane-associated protein	0.00753634	0.607845	0.216207
P13995	MTHFD2	Bifunctional methylenetetrahydrofolate dehydrogenase/cyclohydrolase, mitochondrial	0.05385	0.607668	0.216334
P54577	YARS	Tyrosine--tRNA ligase, cytoplasmic	-0.0125201	0.607522	0.216438
P40925	MDH1	Malate dehydrogenase, cytoplasmic	0.00498008	0.607274	0.216615
Q14444	CAPRIN1	Caprin-1	-0.0153561	0.607265	0.216622
Q15582	TGFBI	Transforming growth factor-beta-induced protein ig-h3	0.0108263	0.606197	0.217386
P12814	ACTN1	Alpha-actinin-1	-0.00866122	0.606095	0.217459
P40222	TXLNA	Alpha-taxilin	-0.0194773	0.605932	0.217576
Q53GG5	PDLIM3	PDZ and LIM domain protein 3	0.00728565	0.605609	0.217808
Q9P2K5	MYEF2	Myelin expression factor 2	-0.0564986	0.604009	0.218957
Q9NZ43	USE1	Vesicle transport protein USE1	0.0106399	0.603995	0.218966
P11532	DMD	Dystrophin	0.00985408	0.603721	0.219164
O75494	SRSF10	Serine/arginine-rich splicing factor 10	-0.0144725	0.603601	0.21925
Q9H6R4	NOL6	Nucleolar protein 6	-0.026612	0.602967	0.219706
P33176	KIF5B	Kinesin-1 heavy chain	-0.00455571	0.602682	0.219912
Q99805	TM9SF2	Transmembrane 9 superfamily member 2	-0.0322837	0.602287	0.220196
Q5U5X0	LYRM7	Complex III assembly factor LYRM7	0.00979916	0.602184	0.220271
Q15424	SAFB	Scaffold attachment factor B1	0.0149208	0.600874	0.221217
Q8NFH4	NUP37	Nucleoporin Nup37	-0.0306279	0.60078	0.221285
Q8IXS6	PALM2	Paralemmin-2	-0.0214531	0.59914	0.222472
O00264	PGRMC1	Membrane-associated progesterone receptor component 1	-0.01575	0.59868	0.222805
Q13492	PICALM	Phosphatidylinositol-binding clathrin assembly protein	-0.0120695	0.598637	0.222836
Q6IQ22	RAB12	Ras-related protein Rab-12	-0.0237494	0.597291	0.223814
Q96JY6	PDLIM2	PDZ and LIM domain protein 2	-0.0261389	0.59727	0.22383
Q96TA2	YME1L1	ATP-dependent zinc metalloprotease YME1L1	-0.0411898	0.597039	0.223997
P61966	AP1S1	AP-1 complex subunit sigma-1A	0.0260886	0.596672	0.224265
Q6YN16	HSDL2	Hydroxysteroid dehydrogenase-like protein 2	0.0077925	0.596421	0.224447
O43294	TGFB1I1	Transforming growth factor beta-1-induced transcript 1 protein	-0.0125608	0.59637	0.224484
Q8TAT6	NPLOC4	Nuclear protein localization protein 4 homolog	0.00504793	0.595934	0.224802
Q6P4E1	CASC4	Protein CASC4	-0.00780047	0.595633	0.225021
P61009	SPCS3	Signal peptidase complex subunit 3	0.0216428	0.595259	0.225294
P20290	BTF3	Transcription factor BTF3	-0.0439252	0.593267	0.22675
Q9NZU5	LMCD1	LIM and cysteine-rich domains protein 1	0.0154075	0.59291	0.227011
P45378	TNNT3	Troponin T, fast skeletal muscle	-0.00682588	0.592776	0.22711
Q99584	S100A13	Protein S100-A13	-0.0276217	0.592441	0.227355
Q9UNW1	MINPP1	Multiple inositol polyphosphate phosphatase 1	-0.0294613	0.591374	0.228138
P21127	CDK11B	Cyclin-dependent kinase 11B	0.0114369	0.590248	0.228966
P26599	PTBP1	Polypyrimidine tract-binding protein 1	0.0043926	0.588807	0.230027
P03905	MT-ND4	NADH-ubiquinone oxidoreductase chain 4	-0.0315482	0.588493	0.230259
P51572	BCAP31	B-cell receptor-associated protein 31	0.00262715	0.588463	0.230281
P16949	STMN1	Stathmin	-0.0169639	0.588084	0.230561
Q15293	RCN1	Reticulocalbin-1	0.0271477	0.588	0.230623
Q9UNF0	PACSIN2	Protein kinase C and casein kinase substrate in neurons protein 2	0.0246781	0.58771	0.230837
P82933	MRPS9	28S ribosomal protein S9, mitochondrial	-0.0692723	0.587621	0.230903
Q15907	RAB11B	Ras-related protein Rab-11B	-0.0134012	0.587478	0.231008
P54920	NAPA	Alpha-soluble NSF attachment protein	-0.00492859	0.587189	0.231222
Q9UMS4	PRPF19	Pre-mRNA-processing factor 19	0.00777734	0.58668	0.231598
Q14061	COX17	Cytochrome c oxidase copper chaperone	-0.0437031	0.586469	0.231755
O15155	BET1	BET1 homolog	-0.085724	0.585227	0.232676
Q9H7Z7	PTGES2	Prostaglandin E synthase 2	-0.0219292	0.584577	0.233159
P13798	APEH	Acylamino-acid-releasing enzyme	0.014359	0.583925	0.233643
P13489	RNH1	Ribonuclease inhibitor	0.00734549	0.583741	0.23378
Q12765	SCRN1	Secernin-1	-0.0295403	0.583054	0.234291
O14907	TAX1BP3	Tax1-binding protein 3	-0.033699	0.582924	0.234388
P09493	TPM1	Tropomyosin alpha-1 chain	-0.0460591	0.582887	0.234416
Q9UHY1	NRBP1	Nuclear receptor-binding protein	-0.0357577	0.582577	0.234647
Q92843	PABPN1	Polyadenylate-binding protein 2	-0.00917626	0.582245	0.234894
P11279	LAMP1	Lysosome-associated membrane glycoprotein 1	0.0150363	0.582023	0.23506
Q9NQT4	EXOSC5	Exosome complex component RRP46	-0.0111875	0.581355	0.235559
P12955	PEPD	Xaa-Pro dipeptidase	-0.0291189	0.58097	0.235846
Q9H173	SIL1	Nucleotide exchange factor SIL1	0.0220533	0.580315	0.236336
P52907	CAPZA1	F-actin-capping protein subunit alpha-1	0.0077903	0.580308	0.236342
Q96RP9	GFM1	Elongation factor G, mitochondrial	0.0550139	0.580212	0.236413
P82675	MRPS5	28S ribosomal protein S5, mitochondrial	-0.0161604	0.580198	0.236424
Q2PZI1	DPY19L1	Probable C-mannosyltransferase DPY19L1	0.0489087	0.579989	0.23658
Q10469	MGAT2	Alpha-1,6-mannosyl-glycoprotein 2-beta-N-acetylglucosaminyltransferase	-0.010677	0.579651	0.236833
Q12768	KIAA0196	WASH complex subunit strumpellin	-0.0247308	0.579505	0.236943
Q8TB37	NUBPL	Iron-sulfur protein NUBPL	0.0317348	0.579237	0.237144
Q6ZRP7	QSOX2	Sulfhydryl oxidase 2	-0.0432704	0.57712	0.238734
P24928	POLR2A	DNA-directed RNA polymerase II subunit RPB1	-0.0224146	0.576811	0.238966
Q9NY33	DPP3	Dipeptidyl peptidase 3	-0.0109128	0.576716	0.239038
P12277	CKB	Creatine kinase B-type	-0.00812682	0.576556	0.239158
P09493	TPM1	Tropomyosin alpha-1 chain	-0.0386414	0.576495	0.239205
Q8IZL8	PELP1	Proline-, glutamic acid- and leucine-rich protein 1	0.0114471	0.575817	0.239716
Q9BZZ5	API5	Apoptosis inhibitor 5	0.0121975	0.575008	0.240326
Q9BXP5	SRRT	Serrate RNA effector molecule homolog	0.0129297	0.575001	0.240332
O00303	EIF3F	Eukaryotic translation initiation factor 3 subunit F	-0.00919286	0.573577	0.241408
P16403	HIST1H1C	Histone H1.2	0.0127491	0.573309	0.241611
Q9H6T3	RPAP3	RNA polymerase II-associated protein 3	-0.0243099	0.573296	0.241621
P51858	HDGF	Hepatoma-derived growth factor	0.030864	0.57329	0.241626
Q9Y676	MRPS18B	28S ribosomal protein S18b, mitochondrial	-0.0214132	0.5698	0.244277
Q13151	HNRNPA0	Heterogeneous nuclear ribonucleoprotein A0	0.0161686	0.569705	0.24435
P18085	ARF4	ADP-ribosylation factor 4	-0.0206237	0.567655	0.245915
Q8IVM0	CCDC50	Coiled-coil domain-containing protein 50	0.0201093	0.566963	0.246445
Q92621	NUP205	Nuclear pore complex protein Nup205	-0.0100146	0.566956	0.246451
P08138	NGFR	Tumor necrosis factor receptor superfamily member 16	-0.0508842	0.565871	0.247282
O60488	ACSL4	Long-chain-fatty-acid--CoA ligase 4	0.010886	0.565549	0.24753
Q709C8	VPS13C	Vacuolar protein sorting-associated protein 13C	-0.0114294	0.565524	0.247549
Q8NC56	LEMD2	LEM domain-containing protein 2	-0.03843	0.565134	0.247849
Q8WTT2	NOC3L	Nucleolar complex protein 3 homolog	0.0214444	0.565064	0.247903
P48507	GCLM	Glutamate--cysteine ligase regulatory subunit	0.0327603	0.563206	0.249333
Q10472	GALNT1	Polypeptide N-acetylgalactosaminyltransferase 1	0.0198353	0.562943	0.249536
P53801	PTTG1IP	Pituitary tumor-transforming gene 1 protein-interacting protein	0.0206104	0.562738	0.249694
Q8TBC4	UBA3	NEDD8-activating enzyme E1 catalytic subunit	0.0169202	0.562735	0.249696
Q9Y6M5	SLC30A1	Zinc transporter 1	-0.0213668	0.561635	0.250546
O94903	PROSC	Proline synthase co-transcribed bacterial homolog protein	-0.0426477	0.560943	0.251081
Q16777	HIST2H2AC	Histone H2A type 2-C	0.00583329	0.56091	0.251107
Q9BYV2	TRIM54	Tripartite motif-containing protein 54	0.0264225	0.560302	0.251578
P11233	RALA	Ras-related protein Ral-A	0.0116354	0.559939	0.251859
O60524	NEMF	Nuclear export mediator factor NEMF	0.0358356	0.559466	0.252226
P17540	CKMT2	Creatine kinase S-type, mitochondrial	0.0127832	0.559171	0.252456
Q14160	SCRIB	Protein scribble homolog	0.0465819	0.559089	0.252519
P28288	ABCD3	ATP-binding cassette sub-family D member 3	0.00416953	0.558825	0.252724
O43847	NRD1	Nardilysin	0.0231653	0.558173	0.253231
Q9UPN3	MACF1	Microtubule-actin cross-linking factor 1, isoforms 1/2/3/5	0.0105338	0.55777	0.253545
P12270	TPR	Nucleoprotein TPR	0.00545102	0.557743	0.253566
Q9NPJ3	ACOT13	Acyl-coenzyme A thioesterase 13	0.0138074	0.55697	0.254168
Q14318	FKBP8	Peptidyl-prolyl cis-trans isomerase FKBP8	0.012878	0.556544	0.2545
O15270	SPTLC2	Serine palmitoyltransferase 2	0.0544961	0.556343	0.254657
P61769	B2M	Beta-2-microglobulin	-0.00747463	0.555535	0.255289
P80303	NUCB2	Nucleobindin-2	0.035652	0.554952	0.255745
Q13683	ITGA7	Integrin alpha-7	0.00813761	0.554671	0.255964
O75116	ROCK2	Rho-associated protein kinase 2	0.0227915	0.553828	0.256625
P56182	RRP1	Ribosomal RNA processing protein 1 homolog A	0.0186516	0.553767	0.256673
Q8NBM8	PCYOX1L	Prenylcysteine oxidase-like	0.0272494	0.553625	0.256785
Q9Y316	MEMO1	Protein MEMO1	0.066378	0.553334	0.257013
Q9NWV4	C1orf123	UPF0587 protein C1orf123	0.0327377	0.551253	0.258649
P42771	CDKN2A	Cyclin-dependent kinase inhibitor 2A	-0.0433522	0.550548	0.259205
P63010	AP2B1	AP-2 complex subunit beta	-0.0110455	0.550332	0.259375
P02792	FTL	Ferritin light chain	-0.0597166	0.549928	0.259694
P0DP25	CALM3	Calmodulin 3	-0.0762974	0.5489	0.260507
P62072	TIMM10	Mitochondrial import inner membrane translocase subunit Tim10	0.0321651	0.548177	0.261079
Q9NQT8	KIF13B	Kinesin-like protein KIF13B	-0.0508117	0.548171	0.261084
Q9NX55	HYPK	Huntingtin-interacting protein K	0.0403586	0.547948	0.261261
Q9Y6E2	BZW2	Basic leucine zipper and W2 domain-containing protein 2	0.0289286	0.547797	0.26138
Q92905	COPS5	COP9 signalosome complex subunit 5	-0.0181624	0.547355	0.261731
O14818	PSMA7	Proteasome subunit alpha type-7	0.00360069	0.546648	0.262292
O00116	AGPS	Alkyldihydroxyacetonephosphate synthase, peroxisomal	-0.00995192	0.545494	0.26321
Q96PK6	RBM14	RNA-binding protein 14	0.00601853	0.545382	0.263299
Q9P121	NTM	Neurotrimin	0.0428052	0.544575	0.263942
Q8TB61	SLC35B2	Adenosine 3-phospho 5-phosphosulfate transporter 1	0.0417845	0.544423	0.264064
P35609	ACTN2	Alpha-actinin-2	-0.00537731	0.543415	0.264868
Q9Y2Z4	YARS2	Tyrosine--tRNA ligase, mitochondrial	-0.0243025	0.542508	0.265594
Q04941	PLP2	Proteolipid protein 2	0.015114	0.539773	0.267788
P31946	YWHAB	14-3-3 protein beta/alpha	-0.0156753	0.539538	0.267978
P23528	CFL1	Cofilin-1	-0.0106451	0.538891	0.268499
P27105	STOM	Erythrocyte band 7 integral membrane protein	-0.0178993	0.538563	0.268763
P01112	HRAS	GTPase Hras	-0.0723666	0.538379	0.268912
P05166	PCCB	Propionyl-CoA carboxylase beta chain, mitochondrial	0.0153392	0.538248	0.269017
O15258	RER1	Protein RER1	-0.0775439	0.537523	0.269603
Q92791	LEPREL4	Synaptonemal complex protein SC65	-0.0268701	0.537061	0.269977
Q9NYF8	BCLAF1	Bcl-2-associated transcription factor 1	-0.0238107	0.536163	0.270703
P61225	RAP2B	Ras-related protein Rap-2b	-0.0177592	0.535783	0.271011
O15294	OGT	UDP-N-acetylglucosamine--peptide N-acetylglucosaminyltransferase 110 kDa subunit	0.0281799	0.534776	0.271828
Q9Y2C4	EXOG	Nuclease EXOG, mitochondrial	0.018753	0.534443	0.272099
Q8TCJ2	STT3B	Dolichyl-diphosphooligosaccharide--protein glycosyltransferase subunit STT3B	0.012674	0.533975	0.272479
Q9Y2D4	EXOC6B	Exocyst complex component 6B	-0.0111359	0.533623	0.272765
Q9Y224	C14orf166	UPF0568 protein C14orf166	-0.0434238	0.533609	0.272777
P82912	MRPS11	28S ribosomal protein S11, mitochondrial	0.0304883	0.53359	0.272792
O75844	ZMPSTE24	CAAX prenyl protease 1 homolog	0.0119891	0.533334	0.273001
P84098	RPL19	60S ribosomal protein L19	-0.0116337	0.532935	0.273326
Q9Y2L1	DIS3	Exosome complex exonuclease RRP44	0.0144559	0.532825	0.273415
Q12931	TRAP1	Heat shock protein 75 kDa, mitochondrial	0.0111624	0.532087	0.274018
Q9UIW2	PLXNA1	Plexin-A1	0.0568377	0.531735	0.274305
P50990	CCT8	T-complex protein 1 subunit theta	-0.00687008	0.531192	0.274748
Q96J84	KIRREL	Kin of IRRE-like protein 1	0.0797888	0.530499	0.275316
Q05639	EEF1A2	Elongation factor 1-alpha 2	-0.010048	0.530027	0.275702
Q9NVI7	ATAD3A	ATPase family AAA domain-containing protein 3A	0.00866637	0.529697	0.275973
P52758	HRSP12	Ribonuclease UK114	-0.0461072	0.529584	0.276065
P08651	NFIC	Nuclear factor 1 C-type	0.0294206	0.52946	0.276167
Q9BS40	LXN	Latexin	0.0218078	0.527804	0.277528
P01889	HLA-B	HLA class I histocompatibility antigen, B-7 alpha chain	-0.0312436	0.527634	0.277668
P24390	KDELR1	ER lumen protein-retaining receptor 1	-0.0475717	0.526799	0.278355
Q13443	ADAM9	Disintegrin and metalloproteinase domain-containing protein 9	-0.0174064	0.525952	0.279054
Q16678	CYP1B1	Cytochrome P450 1B1	-0.0353497	0.525941	0.279063
Q7L2E3	DHX30	Putative ATP-dependent RNA helicase DHX30	-0.0528818	0.525384	0.279524
O95340	PAPSS2	Bifunctional 3-phosphoadenosine 5-phosphosulfate synthase 2	-0.00927966	0.525288	0.279603
Q92575	UBXN4	UBX domain-containing protein 4	0.0255522	0.524546	0.280216
O43684	BUB3	Mitotic checkpoint protein BUB3	0.012564	0.524088	0.280596
P63313	TMSB10	Thymosin beta-10	-0.0303592	0.52336	0.281199
Q8TDZ2	MICAL1	Protein-methionine sulfoxide oxidase MICAL1	0.0262269	0.52181	0.282488
Q9Y2R9	MRPS7	28S ribosomal protein S7, mitochondrial	0.0167966	0.520521	0.283562
P49915	GMPS	GMP synthase [glutamine-hydrolyzing]	-0.0254339	0.520469	0.283605
Q9Y5L4	TIMM13	Mitochondrial import inner membrane translocase subunit Tim13	-0.00786946	0.519449	0.284457
P14406	COX7A2	Cytochrome c oxidase subunit 7A2, mitochondrial	-0.0102052	0.519288	0.284592
Q01844	EWSR1	RNA-binding protein EWS	-0.0422551	0.519091	0.284757
Q9C0B2	CFAP74	Cilia- and flagella-associated protein 74	0.07642	0.518406	0.28533
P20020	ATP2B1	Plasma membrane calcium-transporting ATPase 1	0.00858965	0.516867	0.286622
Q13642	FHL1	Four and a half LIM domains protein 1	-0.0139358	0.516396	0.287017
O00273	DFFA	DNA fragmentation factor subunit alpha	0.0505531	0.516227	0.28716
Q16775	HAGH	Hydroxyacylglutathione hydrolase, mitochondrial	0.0647683	0.515763	0.28755
P35610	SOAT1	Sterol O-acyltransferase 1	-0.041181	0.514709	0.288439
Q9Y5J7	TIMM9	Mitochondrial import inner membrane translocase subunit Tim9	0.0124556	0.513613	0.289364
Q7L523	RRAGA	Ras-related GTP-binding protein A	-0.0261484	0.513489	0.289469
P78347	GTF2I	General transcription factor II-I	-0.0330286	0.513442	0.289508
Q14696	MESDC2	LDLR chaperone MESD	-0.0344294	0.513236	0.289683
P62241	RPS8	40S ribosomal protein S8	-0.00867241	0.513186	0.289725
Q96SU4	OSBPL9	Oxysterol-binding protein-related protein 9	0.0502543	0.512736	0.290106
O00560	SDCBP	Syntenin-1	0.0216247	0.512352	0.290432
Q93052	LPP	Lipoma-preferred partner	-0.0291382	0.5123	0.290476
P22102	GART	Trifunctional purine biosynthetic protein adenosine-3	-0.0124999	0.512263	0.290507
Q9UH65	SWAP70	Switch-associated protein 70	0.0475183	0.512201	0.29056
P55145	MANF	Mesencephalic astrocyte-derived neurotrophic factor	-0.0238014	0.511435	0.291209
P68036	UBE2L3	Ubiquitin-conjugating enzyme E2 L3	-0.0405038	0.510839	0.291716
Q8TED9	AFAP1L1	Actin filament-associated protein 1-like 1	0.0142191	0.510025	0.292409
Q9Y6I9	TEX264	Testis-expressed sequence 264 protein	-0.0935254	0.509931	0.292489
P08865	RPSA	40S ribosomal protein SA	-0.00425739	0.509787	0.292611
Q14194	CRMP1	Dihydropyrimidinase-related protein 1	0.0201444	0.509583	0.292785
Q6GMV3	PTRHD1	Putative peptidyl-tRNA hydrolase PTRHD1	-0.0369993	0.509284	0.29304
P40261	NNMT	Nicotinamide N-methyltransferase	0.00251715	0.508732	0.293511
Q99715	COL12A1	Collagen alpha-1(XII) chain	0.0389667	0.508604	0.29362
O43681	ASNA1	ATPase ASNA1	0.00866857	0.508315	0.293867
O00233	PSMD9	26S proteasome non-ATPase regulatory subunit 9	-0.0353553	0.507778	0.294326
P30038	ALDH4A1	Delta-1-pyrroline-5-carboxylate dehydrogenase, mitochondrial	0.0141366	0.507686	0.294405
O95980	RECK	Reversion-inducing cysteine-rich protein with Kazal motifs	0.0169621	0.507626	0.294456
Q86XR7	TMED7	Transmembrane emp24 domain-containing protein 7	0.0222477	0.507044	0.294955
Q9UNZ2	NSFL1C	NSFL1 cofactor p47	-0.0133894	0.506924	0.295057
P49720	PSMB3	Proteasome subunit beta type-3	0.0192224	0.506616	0.295322
Q6PI78	TMEM65	Transmembrane protein 65	0.0500752	0.506291	0.2956
Q8WWB7	GLMP	Glycosylated lysosomal membrane protein	-0.0601655	0.506016	0.295836
Q9H7M9	C10orf54	Platelet receptor Gi24	0.0459269	0.50582	0.296004
Q08945	SSRP1	FACT complex subunit SSRP1	-0.0258734	0.505544	0.296241
Q9NYP7	ELOVL5	Elongation of very long chain fatty acids protein 5	-0.0956456	0.505307	0.296445
Q14166	TTLL12	Tubulin--tyrosine ligase-like protein 12	-0.0352522	0.50525	0.296493
Q9UNX4	WDR3	WD repeat-containing protein 3	-0.0353104	0.505121	0.296605
Q15121	PEA15	Astrocytic phosphoprotein PEA-15	-0.021734	0.505045	0.29667
Q9BX66	SORBS1	Sorbin and SH3 domain-containing protein 1	-0.015026	0.504883	0.29681
Q9GZT6	CCDC90B	Coiled-coil domain-containing protein 90B, mitochondrial	0.0105517	0.504876	0.296815
Q9Y285	FARSA	Phenylalanine--tRNA ligase alpha subunit	-0.00480785	0.504842	0.296845
Q15363	TMED2	Transmembrane emp24 domain-containing protein 2	0.0197885	0.504839	0.296847
Q7Z7F7	MRPL55	39S ribosomal protein L55, mitochondrial	0.0449053	0.504739	0.296933
P50479	PDLIM4	PDZ and LIM domain protein 4	0.0123581	0.504567	0.297081
P62258	YWHAE	14-3-3 protein epsilon	-0.00745599	0.504519	0.297123
P23368	ME2	NAD-dependent malic enzyme, mitochondrial	0.00923682	0.504321	0.297293
O75347	TBCA	Tubulin-specific chaperone A	-0.00644923	0.503758	0.297778
Q5BKX8	MURC	Muscle-related coiled-coil protein	0.0115124	0.502698	0.298693
P55060	CSE1L	Exportin-2	-0.0511819	0.502314	0.299024
Q8WUJ3	CEMIP	Cell migration-inducing and hyaluronan-binding protein	-0.0651835	0.501655	0.299595
O43488	AKR7A2	Aflatoxin B1 aldehyde reductase member 2	0.00794034	0.50147	0.299755
Q9Y281	CFL2	Cofilin-2	0.00651202	0.50064	0.300474
Q9NQC3	RTN4	Reticulon-4	0.00636452	0.500497	0.300599
Q7Z4H8	KDELC2	KDEL motif-containing protein 2	0.0341856	0.50044	0.300648
Q9H3K2	GHITM	Growth hormone-inducible transmembrane protein	0.0283695	0.500259	0.300805
Q9H8H3	METTL7A	Methyltransferase-like protein 7A	-0.0611291	0.500238	0.300823
P50552	VASP	Vasodilator-stimulated phosphoprotein	-0.00846283	0.500049	0.300987
Q5BKZ1	ZNF326	DBIRD complex subunit ZNF326	-0.0594779	0.498837	0.302042
O14683	TP53I11	Tumor protein p53-inducible protein 11	0.0320625	0.498557	0.302285
Q9BZK7	TBL1XR1	F-box-like/WD repeat-containing protein TBL1XR1	0.0242422	0.498404	0.302419
P14649	MYL6B	Myosin light chain 6B	-0.00630023	0.49824	0.302562
Q8N1G4	LRRC47	Leucine-rich repeat-containing protein 47	0.0102398	0.498114	0.302672
Q9BTW9	TBCD	Tubulin-specific chaperone D	-0.0124373	0.49806	0.302718
P10619	CTSA	Lysosomal protective protein	-0.0513146	0.497903	0.302855
O14494	PPAP2A	Lipid phosphate phosphohydrolase 1	-0.054591	0.497678	0.303051
Q9P2J5	LARS	Leucine--tRNA ligase, cytoplasmic	-0.0166044	0.497616	0.303105
O14980	XPO1	Exportin-1	-0.0110129	0.497178	0.303488
P09110	ACAA1	3-ketoacyl-CoA thiolase, peroxisomal	0.0113489	0.497125	0.303534
Q9H330	TMEM245	Transmembrane protein 245	-0.0323063	0.496246	0.304303
Q9UIJ7	AK3	GTP:AMP phosphotransferase AK3, mitochondrial	-0.00902107	0.49548	0.304974
O75937	DNAJC8	DnaJ homolog subfamily C member 8	0.0387923	0.495164	0.305251
P46776	RPL27A	60S ribosomal protein L27a	-0.0246625	0.49467	0.305684
Q8WWM7	ATXN2L	Ataxin-2-like protein	0.0461031	0.494565	0.305777
Q13405	MRPL49	39S ribosomal protein L49, mitochondrial	-0.0380661	0.494113	0.306174
Q92900	UPF1	Regulator of nonsense transcripts 1	-0.00598598	0.493346	0.306849
Q9BWD1	ACAT2	Acetyl-CoA acetyltransferase, cytosolic	-0.0153232	0.493344	0.30685
Q13563	PKD2	Polycystin-2	-0.0438021	0.493245	0.306937
O15400	STX7	Syntaxin-7	0.00909343	0.492372	0.307707
P62633	CNBP	Cellular nucleic acid-binding protein	-0.0167137	0.490276	0.309559
Q92626	PXDN	Peroxidasin homolog	0.0119378	0.490037	0.309771
Q9Y2D5	AKAP2	A-kinase anchor protein 2	0.0060315	0.489469	0.310275
O15042	U2SURP	U2 snRNP-associated SURP motif-containing protein	-0.0177452	0.489188	0.310524
P07585	DCN	Decorin	-0.0665022	0.489041	0.310655
Q9BRK5	SDF4	45 kDa calcium-binding protein	0.0686216	0.488826	0.310846
Q14699	RFTN1	Raftlin	-0.00754821	0.488823	0.310848
Q12849	GRSF1	G-rich sequence factor 1	-0.0332227	0.487853	0.311711
Q9UP95	SLC12A4	Solute carrier family 12 member 4	0.0345868	0.48781	0.311749
Q9NX47	MARCH5	E3 ubiquitin-protein ligase MARCH5	0.0259526	0.487533	0.311996
P33121	ACSL1	Long-chain-fatty-acid--CoA ligase 1	0.0075541	0.487402	0.312113
Q9NRX4	PHPT1	14 kDa phosphohistidine phosphatase	-0.0556058	0.487342	0.312166
P47755	CAPZA2	F-actin-capping protein subunit alpha-2	-0.00692768	0.486696	0.312742
P41091	EIF2S3	Eukaryotic translation initiation factor 2 subunit 3	-0.00743747	0.486596	0.312831
Q9NW15	ANO10	Anoctamin-10	0.0187032	0.486136	0.313243
Q15043	SLC39A14	Zinc transporter ZIP14	0.0227993	0.485726	0.313609
P55884	EIF3B	Eukaryotic translation initiation factor 3 subunit B	-0.00482448	0.484797	0.31444
Q01813	PFKP	ATP-dependent 6-phosphofructokinase, platelet type	-0.0118509	0.484659	0.314564
P46939	UTRN	Utrophin	-0.00662414	0.484617	0.314602
O00148	DDX39A	ATP-dependent RNA helicase DDX39A	0.0565517	0.484389	0.314806
P13473	LAMP2	Lysosome-associated membrane glycoprotein 2	0.0478074	0.483655	0.315464
O95232	LUC7L3	Luc7-like protein 3	-0.0013866	0.483598	0.315516
Q02952	AKAP12	A-kinase anchor protein 12	-0.0272557	0.483441	0.315657
P16989	YBX3	Y-box-binding protein 3	-0.0533359	0.482434	0.316562
P43121	MCAM	Cell surface glycoprotein MUC18	0.0258144	0.482422	0.316573
P50502	ST13	Hsc70-interacting protein	0.0102792	0.481475	0.317426
P00441	SOD1	Superoxide dismutase [Cu-Zn]	-0.0159342	0.481211	0.317664
P62857	RPS28	40S ribosomal protein S28	-0.0956582	0.480446	0.318356
Q8WX93	PALLD	Palladin	0.0105126	0.479441	0.319265
P29323	EPHB2	Ephrin type-B receptor 2	0.01921	0.479231	0.319455
Q9Y2A7	NCKAP1	Nck-associated protein 1	-0.0118609	0.479118	0.319558
P17252	PRKCA	Protein kinase C alpha type	0.0225962	0.478617	0.320012
O14828	SCAMP3	Secretory carrier-associated membrane protein 3	0.0113779	0.478182	0.320407
Q15075	EEA1	Early endosome antigen 1	-0.0324993	0.478034	0.320541
Q9UEU0	VTI1B	Vesicle transport through interaction with t-SNAREs homolog 1B	-0.0362398	0.477931	0.320635
Q99653	CHP1	Calcineurin B homologous protein 1	0.0461063	0.477558	0.320974
P53680	AP2S1	AP-2 complex subunit sigma	0.0428583	0.476655	0.321796
Q8IVN3	MUSTN1	Musculoskeletal embryonic nuclear protein 1	0.0239638	0.476609	0.321838
Q12959	DLG1	Disks large homolog 1	-0.0537566	0.476598	0.321848
Q8WWX9	SELM	Selenoprotein M	-0.0359272	0.476571	0.321872
Q15084	PDIA6	Protein disulfide-isomerase A6	0.00197483	0.476563	0.32188
Q9HC07	TMEM165	Transmembrane protein 165	0.0132945	0.475826	0.322551
Q01081	U2AF1	Splicing factor U2AF 35 kDa subunit	-0.0293911	0.475751	0.322621
O00468	AGRN	Agrin	0.0106246	0.475599	0.32276
Q14118	DAG1	Dystroglycan	0.00635214	0.475532	0.32282
Q15836	VAMP3	Vesicle-associated membrane protein 3	0.0122765	0.475461	0.322886
O95782	AP2A1	AP-2 complex subunit alpha-1	-0.00887607	0.475376	0.322963
Q9Y3Y2	CHTOP	Chromatin target of PRMT1 protein	0.0154484	0.475328	0.323007
P49959	MRE11A	Double-strand break repair protein MRE11A	0.0292406	0.473884	0.324328
O60568	PLOD3	Procollagen-lysine,2-oxoglutarate 5-dioxygenase 3	0.00840388	0.473832	0.324376
P19634	SLC9A1	Sodium/hydrogen exchanger 1	-0.0149202	0.473342	0.324825
Q9HBH5	RDH14	Retinol dehydrogenase 14	-0.064931	0.47293	0.325203
Q9HB71	CACYBP	Calcyclin-binding protein	-0.0152909	0.472741	0.325377
P35637	FUS	RNA-binding protein FUS	-0.0276816	0.472497	0.3256
P60468	SEC61B	Protein transport protein Sec61 subunit beta	0.0103308	0.472424	0.325668
Q14669	TRIP12	E3 ubiquitin-protein ligase TRIP12	-0.013944	0.471923	0.326129
Q9ULC4	MCTS1	Malignant T-cell-amplified sequence 1	0.019906	0.471218	0.326778
Q8NHP8	PLBD2	Putative phospholipase B-like 2	-0.00399515	0.470509	0.327432
Q9Y3C6	PPIL1	Peptidyl-prolyl cis-trans isomerase-like 1	0.0383259	0.469019	0.32881
Q9H3K6	BOLA2	BolA-like protein 2	0.0357478	0.468139	0.329625
P31949	S100A11	Protein S100-A11	0.029827	0.467627	0.330101
P04181	OAT	Ornithine aminotransferase, mitochondrial	0.0112391	0.467255	0.330446
P21266	GSTM3	Glutathione S-transferase Mu 3	-0.0285335	0.466628	0.331029
O43264	ZW10	Centromere/kinetochore protein zw10 homolog	0.014203	0.466499	0.33115
Q53FA7	TP53I3	Quinone oxidoreductase PIG3	0.0293477	0.46621	0.331418
P22090	RPS4Y1	40S ribosomal protein S4, Y isoform 1	0.0491378	0.465844	0.331759
A1L0T0	ILVBL	Acetolactate synthase-like protein	0.0109333	0.465695	0.331898
Q9BYD6	MRPL1	39S ribosomal protein L1, mitochondrial	0.0174959	0.464697	0.33283
P15170	GSPT1	Eukaryotic peptide chain release factor GTP-binding subunit ERF3A	-0.0232268	0.464057	0.333429
Q15018	FAM175B	BRISC complex subunit Abro1	-0.0514259	0.46394	0.333538
Q99848	EBNA1BP2	Probable rRNA-processing protein EBP2	0.0353151	0.463041	0.33438
Q6UW63	KDELC1	KDEL motif-containing protein 1	-0.0396189	0.462331	0.335047
P13693	TPT1	Translationally-controlled tumor protein	-0.0187446	0.462071	0.335291
Q9H553	ALG2	Alpha-1,3/1,6-mannosyltransferase ALG2	0.0428633	0.461794	0.335551
O43292	GPAA1	Glycosylphosphatidylinositol anchor attachment 1 protein	0.0947532	0.461591	0.335742
O43148	RNMT	mRNA cap guanine-N7 methyltransferase	0.0364916	0.460847	0.336444
Q07954	LRP1	Prolow-density lipoprotein receptor-related protein 1	-0.00248264	0.46062	0.336657
P49792	RANBP2	E3 SUMO-protein ligase RanBP2	0.0199068	0.460296	0.336962
P09493	TPM1	Tropomyosin alpha-1 chain	0.0602375	0.45972	0.337506
Q9Y4Z0	LSM4	U6 snRNA-associated Sm-like protein LSm4	0.0377629	0.459684	0.337541
O00429	DNM1L	Dynamin-1-like protein	-0.0304744	0.459491	0.337723
Q9Y3Q3	TMED3	Transmembrane emp24 domain-containing protein 3	-0.0379044	0.458776	0.338399
P43686	PSMC4	26S protease regulatory subunit 6B	-0.00600172	0.458019	0.339116
Q99622	C12orf57	Protein C10	-0.0247433	0.457626	0.339489
P62910	RPL32	60S ribosomal protein L32	-0.0138692	0.45761	0.339504
P18124	RPL7	60S ribosomal protein L7	-0.00947273	0.456998	0.340085
P62140	PPP1CB	Serine/threonine-protein phosphatase PP1-beta catalytic subunit	0.0212785	0.455769	0.341255
Q01105	SET	Protein SET	0.0937415	0.45539	0.341617
P67936	TPM4	Tropomyosin alpha-4 chain	0.0264605	0.454727	0.342249
Q969Z0	TBRG4	Protein TBRG4	-0.0447031	0.453722	0.34321
Q99442	SEC62	Translocation protein SEC62	-0.0391267	0.453295	0.343619
P08243	ASNS	Asparagine synthetase [glutamine-hydrolyzing]	-0.055504	0.452944	0.343956
Q8N2K0	ABHD12	Monoacylglycerol lipase ABHD12	-0.0542477	0.452029	0.344833
P49748	ACADVL	Very long-chain specific acyl-CoA dehydrogenase, mitochondrial	0.00895734	0.45184	0.345016
Q13131	PRKAA1	5-AMP-activated protein kinase catalytic subunit alpha-1	-0.0130124	0.451305	0.34553
P61160	ACTR2	Actin-related protein 2	-0.00576146	0.450206	0.346589
P67936	TPM4	Tropomyosin alpha-4 chain	-0.0496754	0.449078	0.347678
Q13242	SRSF9	Serine/arginine-rich splicing factor 9	0.0542909	0.448366	0.348367
P38117	ETFB	Electron transfer flavoprotein subunit beta	0.00995176	0.448218	0.348511
Q9Y697	NFS1	Cysteine desulfurase, mitochondrial	0.0808144	0.447636	0.349075
Q5JRX3	PITRM1	Presequence protease, mitochondrial	0.00573406	0.447603	0.349107
P13591	NCAM1	Neural cell adhesion molecule 1	-0.0175805	0.446802	0.349885
Q13617	CUL2	Cullin-2	-0.028712	0.44668	0.350004
P51659	HSD17B4	Peroxisomal multifunctional enzyme type 2	0.00711983	0.44657	0.350111
Q9Y646	CPQ	Carboxypeptidase Q	-0.0293031	0.446501	0.350178
Q9UN86	G3BP2	Ras GTPase-activating protein-binding protein 2	0.0128844	0.444632	0.352
O75368	SH3BGRL	SH3 domain-binding glutamic acid-rich-like protein	-0.033096	0.444271	0.352352
O43765	SGTA	Small glutamine-rich tetratricopeptide repeat-containing protein alpha	-0.00777429	0.444182	0.352439
O43815	STRN	Striatin	0.0321102	0.444052	0.352566
P13987	CD59	CD59 glycoprotein	0.0115326	0.443905	0.35271
O75976	CPD	Carboxypeptidase D	-0.064408	0.44367	0.35294
Q9NYL9	TMOD3	Tropomodulin-3	0.0145283	0.443593	0.353015
P20674	COX5A	Cytochrome c oxidase subunit 5A, mitochondrial	0.00929659	0.443099	0.353499
Q9NQP4	PFDN4	Prefoldin subunit 4	0.0605741	0.44208	0.354499
O43159	RRP8	Ribosomal RNA-processing protein 8	-0.0121043	0.442062	0.354517
Q8IWU6	SULF1	Extracellular sulfatase Sulf-1	-0.0257661	0.44205	0.354528
P60660	MYL6	Myosin light polypeptide 6	0.0203153	0.441531	0.355039
Q99832	CCT7	T-complex protein 1 subunit eta	-0.00799761	0.441455	0.355114
O94919	ENDOD1	Endonuclease domain-containing 1 protein	0.00895861	0.440649	0.355907
P51153	RAB13	Ras-related protein Rab-13	0.0291854	0.440428	0.356125
P48651	PTDSS1	Phosphatidylserine synthase 1	-0.00988382	0.440214	0.356337
Q92530	PSMF1	Proteasome inhibitor PI31 subunit	-0.0775136	0.440044	0.356504
P26440	IVD	Isovaleryl-CoA dehydrogenase, mitochondrial	-0.0140348	0.43992	0.356626
P05023	ATP1A1	Sodium/potassium-transporting ATPase subunit alpha-1	0.0126653	0.439674	0.356869
O60762	DPM1	Dolichol-phosphate mannosyltransferase subunit 1	0.0135428	0.439422	0.357118
P27816	MAP4	Microtubule-associated protein 4	-0.0215785	0.438613	0.357919
Q14678	KANK1	KN motif and ankyrin repeat domain-containing protein 1	-0.0420604	0.438277	0.358251
Q92878	RAD50	DNA repair protein RAD50	-0.0310072	0.437878	0.358647
Q9BT22	ALG1	Chitobiosyldiphosphodolichol beta-mannosyltransferase	0.0529738	0.437764	0.35876
P54802	NAGLU	Alpha-N-acetylglucosaminidase	0.021002	0.437063	0.359456
Q13564	NAE1	NEDD8-activating enzyme E1 regulatory subunit	0.0373817	0.436701	0.359815
Q9UQE7	SMC3	Structural maintenance of chromosomes protein 3	-0.0369197	0.436372	0.360143
O75147	OBSL1	Obscurin-like protein 1	-0.0143065	0.436357	0.360158
Q9Y5A9	YTHDF2	YTH domain-containing family protein 2	-0.00983655	0.435853	0.36066
O95433	AHSA1	Activator of 90 kDa heat shock protein ATPase homolog 1	0.0155981	0.434974	0.361537
Q9BT78	COPS4	COP9 signalosome complex subunit 4	-0.039787	0.434786	0.361725
P63316	TNNC1	Troponin C, slow skeletal and cardiac muscles	-0.0373177	0.434603	0.361907
P14618	PKM	Pyruvate kinase PKM	-0.0085969	0.434581	0.36193
Q9BQE5	APOL2	Apolipoprotein L2	0.0137677	0.434562	0.361948
O95456	PSMG1	Proteasome assembly chaperone 1	0.0259974	0.434395	0.362115
P38646	HSPA9	Stress-70 protein, mitochondrial	0.00768236	0.434219	0.362291
Q8N983	MRPL43	39S ribosomal protein L43, mitochondrial	-0.0277739	0.434113	0.362397
P25787	PSMA2	Proteasome subunit alpha type-2	-0.00800304	0.433954	0.362557
O00232	PSMD12	26S proteasome non-ATPase regulatory subunit 12	0.0155977	0.431903	0.364614
Q9UI14	RABAC1	Prenylated Rab acceptor protein 1	0.00987651	0.431426	0.365093
P06744	GPI	Glucose-6-phosphate isomerase	-0.00894086	0.431235	0.365286
Q8NHH9	ATL2	Atlastin-2	0.0267129	0.431078	0.365444
O75351	VPS4B	Vacuolar protein sorting-associated protein 4B	0.0088442	0.431007	0.365516
P30040	ERP29	Endoplasmic reticulum resident protein 29	0.00799136	0.430812	0.365712
P61026	RAB10	Ras-related protein Rab-10	0.00805246	0.430595	0.365931
P26447	S100A4	Protein S100-A4	-0.05684	0.430571	0.365955
Q9NRW7	VPS45	Vacuolar protein sorting-associated protein 45	0.0117366	0.429702	0.366833
Q99460	PSMD1	26S proteasome non-ATPase regulatory subunit 1	0.00773467	0.429427	0.36711
Q27J81	INF2	Inverted formin-2	0.0131974	0.429274	0.367265
Q9HCU5	PREB	Prolactin regulatory element-binding protein	0.0536074	0.429199	0.367342
O00299	CLIC1	Chloride intracellular channel protein 1	-0.00705406	0.429053	0.367489
Q96DA6	DNAJC19	Mitochondrial import inner membrane translocase subunit TIM14	-0.0368501	0.429036	0.367506
Q9Y3D2	MSRB2	Methionine-R-sulfoxide reductase B2, mitochondrial	-0.0678472	0.428458	0.368092
Q2M389	KIAA1033	WASH complex subunit 7	0.0374225	0.428157	0.368397
Q5JRA6	MIA3	Melanoma inhibitory activity protein 3	0.013684	0.42743	0.369135
Q12979	ABR	Active breakpoint cluster region-related protein	0.02074	0.427376	0.36919
P39687	ANP32A	Acidic leucine-rich nuclear phosphoprotein 32 family member A	0.0223189	0.427296	0.369271
Q8IWX8	CHERP	Calcium homeostasis endoplasmic reticulum protein	0.0621139	0.426267	0.370318
Q9BY77	POLDIP3	Polymerase delta-interacting protein 3	-0.0464691	0.42621	0.370376
Q9H3N1	TMX1	Thioredoxin-related transmembrane protein 1	0.00835849	0.426098	0.370491
P36871	PGM1	Phosphoglucomutase-1	-0.0832572	0.42603	0.37056
P30405	PPIF	Peptidyl-prolyl cis-trans isomerase F, mitochondrial	-0.0468682	0.425906	0.370686
P05455	SSB	Lupus La protein	0.0127504	0.425825	0.370769
Q32MZ4	LRRFIP1	Leucine-rich repeat flightless-interacting protein 1	-0.0442482	0.425415	0.371188
P07339	CTSD	Cathepsin D	0.00478763	0.425299	0.371306
Q9Y3D6	FIS1	Mitochondrial fission 1 protein	-0.0106831	0.424566	0.372055
P15374	UCHL3	Ubiquitin carboxyl-terminal hydrolase isozyme L3	0.0619134	0.42455	0.372071
Q16718	NDUFA5	NADH dehydrogenase [ubiquinone] 1 alpha subcomplex subunit 5	-0.0355016	0.424019	0.372614
Q13162	PRDX4	Peroxiredoxin-4	0.0217989	0.423851	0.372787
Q13247	SRSF6	Serine/arginine-rich splicing factor 6	0.0215802	0.423601	0.373043
Q99757	TXN2	Thioredoxin, mitochondrial	-0.0330862	0.423485	0.373162
P32321	DCTD	Deoxycytidylate deaminase	-0.0449811	0.423327	0.373324
P43007	SLC1A4	Neutral amino acid transporter A	0.0608589	0.422144	0.374539
P40227	CCT6A	T-complex protein 1 subunit zeta	-0.00529525	0.422124	0.37456
Q96SL4	GPX7	Glutathione peroxidase 7	-0.0416575	0.422102	0.374583
Q9NR28	DIABLO	Diablo homolog, mitochondrial	0.0090215	0.421919	0.374771
P33778	HIST1H2BB	Histone H2B type 1-B	-0.0284426	0.42159	0.37511
Q14C86	GAPVD1	GTPase-activating protein and VPS9 domain-containing protein 1	-0.0229465	0.421211	0.375501
O95159	ZFPL1	Zinc finger protein-like 1	0.018254	0.421157	0.375556
Q9NX24	NHP2	H/ACA ribonucleoprotein complex subunit 2	-0.0411864	0.420366	0.376373
Q7L2H7	EIF3M	Eukaryotic translation initiation factor 3 subunit M	-0.0404918	0.420349	0.37639
Q96FZ7	CHMP6	Charged multivesicular body protein 6	0.0459895	0.420121	0.376626
Q12929	EPS8	Epidermal growth factor receptor kinase substrate 8	-0.0613598	0.41986	0.376896
O14949	UQCRQ	Cytochrome b-c1 complex subunit 8	-0.0318336	0.41929	0.377485
Q96AB3	ISOC2	Isochorismatase domain-containing protein 2, mitochondrial	0.0126021	0.4191	0.377682
P19404	NDUFV2	NADH dehydrogenase [ubiquinone] flavoprotein 2, mitochondrial	-0.00962386	0.418796	0.377998
Q15233	NONO	Non-POU domain-containing octamer-binding protein	0.0141712	0.418472	0.378333
O95168	NDUFB4	NADH dehydrogenase [ubiquinone] 1 beta subcomplex subunit 4	0.0292129	0.418074	0.378747
Q09161	NCBP1	Nuclear cap-binding protein subunit 1	0.0178095	0.417829	0.379001
Q14157	UBAP2L	Ubiquitin-associated protein 2-like	-0.0112296	0.417606	0.379233
Q07812	BAX	Apoptosis regulator BAX	0.0144984	0.417015	0.379848
Q14249	ENDOG	Endonuclease G, mitochondrial	-0.0307312	0.416871	0.379998
O75363	BCAS1	Breast carcinoma-amplified sequence 1	-0.0304461	0.416411	0.380478
O43252	PAPSS1	Bifunctional 3-phosphoadenosine 5-phosphosulfate synthase 1	0.060992	0.416197	0.380701
P63151	PPP2R2A	Serine/threonine-protein phosphatase 2A 55 kDa regulatory subunit B alpha isoform	-0.0553686	0.41612	0.380781
P35579	MYH9	Myosin-9	0.00995024	0.416004	0.380902
P26885	FKBP2	Peptidyl-prolyl cis-trans isomerase FKBP2	-0.0195225	0.415619	0.381304
P23229	ITGA6	Integrin alpha-6	-0.00682668	0.414881	0.382077
P48556	PSMD8	26S proteasome non-ATPase regulatory subunit 8	-0.0323311	0.414211	0.382778
Q15185	PTGES3	Prostaglandin E synthase 3	0.0424431	0.413771	0.38324
Q16658	FSCN1	Fascin	-0.0135094	0.413718	0.383296
Q8N183	NDUFAF2	Mimitin, mitochondrial	0.00970922	0.413243	0.383794
Q9UGI8	TES	Testin	-0.0534083	0.412759	0.384303
Q92552	MRPS27	28S ribosomal protein S27, mitochondrial	0.052345	0.41267	0.384397
Q96L96	ALPK3	Alpha-protein kinase 3	-0.063249	0.412115	0.384982
O60613	SEP15	15 kDa selenoprotein	0.0558606	0.411488	0.385643
P14866	HNRNPL	Heterogeneous nuclear ribonucleoprotein L	0.00715856	0.411285	0.385857
Q5IS80	APP	Amyloid beta A4 protein	0.0304294	0.410958	0.386203
Q16563	SYPL1	Synaptophysin-like protein 1	0.0347631	0.410481	0.386707
O75390	CS	Citrate synthase, mitochondrial	0.0109612	0.410285	0.386914
Q9NSC5	HOMER3	Homer protein homolog 3	0.0120061	0.409546	0.387697
Q9BU23	LMF2	Lipase maturation factor 2	-0.0224523	0.409042	0.388232
P08670	VIM	Vimentin	0.0162162	0.408768	0.388523
Q07092	COL16A1	Collagen alpha-1(XVI) chain	0.0218385	0.408147	0.389184
O15173	PGRMC2	Membrane-associated progesterone receptor component 2	0.012144	0.407734	0.389623
P80723	BASP1	Brain acid soluble protein 1	0.0151511	0.407495	0.389877
Q9HA77	CARS2	Probable cysteine--tRNA ligase, mitochondrial	0.0541445	0.407275	0.390112
Q15020	SART3	Squamous cell carcinoma antigen recognized by T-cells 3	0.0159191	0.407132	0.390265
P09622	DLD	Dihydrolipoyl dehydrogenase, mitochondrial	0.0226376	0.407108	0.39029
P09493	TPM1	Tropomyosin alpha-1 chain	0.015657	0.406648	0.390782
Q9BUJ2	HNRNPUL1	Heterogeneous nuclear ribonucleoprotein U-like protein 1	0.0131418	0.406531	0.390906
P30044	PRDX5	Peroxiredoxin-5, mitochondrial	0.013718	0.405463	0.392049
O43852	CALU	Calumenin	0.0530074	0.404402	0.393187
O75439	PMPCB	Mitochondrial-processing peptidase subunit beta	0.0143654	0.403653	0.393992
Q9GZQ8	MAP1LC3B	Microtubule-associated proteins 1A/1B light chain 3B	0.0267825	0.402892	0.394811
Q6P9B6	TLDC1	TLD domain-containing protein 1	-0.0401746	0.402842	0.394865
Q15042	RAB3GAP1	Rab3 GTPase-activating protein catalytic subunit	-0.048072	0.402682	0.395037
Q7Z4H3	HDDC2	HD domain-containing protein 2	0.0358643	0.402487	0.395248
P50914	RPL14	60S ribosomal protein L14	-0.00717168	0.402396	0.395346
Q92820	GGH	Gamma-glutamyl hydrolase	-0.0102187	0.402347	0.395399
Q9Y2X3	NOP58	Nucleolar protein 58	0.0228782	0.401915	0.395866
P28070	PSMB4	Proteasome subunit beta type-4	0.0265892	0.40191	0.395871
P23526	AHCY	Adenosylhomocysteinase	-0.0102686	0.401808	0.395981
Q9NQS1	AVEN	Cell death regulator Aven	-0.063713	0.401617	0.396188
P17661	DES	Desmin	-0.0198775	0.400134	0.397795
O94905	ERLIN2	Erlin-2	0.00750513	0.400047	0.397889
Q16762	TST	Thiosulfate sulfurtransferase	0.0120665	0.399988	0.397953
Q8TCT9	HM13	Minor histocompatibility antigen H13	0.00936835	0.399902	0.398046
P14678	SNRPB	Small nuclear ribonucleoprotein-associated proteins B and B	0.0150102	0.39984	0.398114
P09874	PARP1	Poly [ADP-ribose] polymerase 1	-0.017696	0.399507	0.398475
P60033	CD81	CD81 antigen	0.00756707	0.398666	0.399391
P43304	GPD2	Glycerol-3-phosphate dehydrogenase, mitochondrial	0.00752203	0.398085	0.400024
O95810	SDPR	Serum deprivation-response protein	0.0164769	0.3971	0.4011
P11182	DBT	Lipoamide acyltransferase component of branched-chain alpha-keto acid dehydrogenase complex, mitochondrial	0.00941942	0.396816	0.401411
P30876	POLR2B	DNA-directed RNA polymerase II subunit RPB2	-0.0398863	0.396682	0.401557
P62314	SNRPD1	Small nuclear ribonucleoprotein Sm D1	-0.0423912	0.396496	0.401761
O43747	AP1G1	AP-1 complex subunit gamma-1	-0.0422071	0.396301	0.401975
P23786	CPT2	Carnitine O-palmitoyltransferase 2, mitochondrial	0.0102794	0.395495	0.402859
P36873	PPP1CC	Serine/threonine-protein phosphatase PP1-gamma catalytic subunit	0.0524654	0.395214	0.403168
P42025	ACTR1B	Beta-centractin	-0.0712364	0.394715	0.403717
Q9UL25	RAB21	Ras-related protein Rab-21	0.0087417	0.39425	0.404228
P26232	CTNNA2	Catenin alpha-2	-0.0782417	0.394123	0.404368
Q9NW13	RBM28	RNA-binding protein 28	-0.0318455	0.393611	0.404933
Q13425	SNTB2	Beta-2-syntrophin	-0.0309783	0.393394	0.405172
P31749	AKT1	RAC-alpha serine/threonine-protein kinase	0.0463159	0.393247	0.405334
Q8IZV5	RDH10	Retinol dehydrogenase 10	0.0411581	0.393159	0.405432
Q86UE4	MTDH	Protein LYRIC	-0.0215013	0.393136	0.405457
Q86WC4	OSTM1	Osteopetrosis-associated transmembrane protein 1	-0.0493211	0.393047	0.405556
P05198	EIF2S1	Eukaryotic translation initiation factor 2 subunit 1	0.00450102	0.393003	0.405604
Q15397	KIAA0020	Pumilio domain-containing protein KIAA0020	0.0545061	0.39207	0.406636
P62308	SNRPG	Small nuclear ribonucleoprotein G	-0.0688476	0.391958	0.406761
P09455	RBP1	Retinol-binding protein 1	0.0797766	0.391874	0.406854
Q96C36	PYCR2	Pyrroline-5-carboxylate reductase 2	0.0127806	0.391376	0.407406
Q9BQ69	MACROD1	O-acetyl-ADP-ribose deacetylase MACROD1	0.0286674	0.391186	0.407617
Q08379	GOLGA2	Golgin subfamily A member 2	0.0266507	0.391028	0.407792
O43795	MYO1B	Unconventional myosin-Ib	0.00704054	0.390837	0.408005
Q96AY3	FKBP10	Peptidyl-prolyl cis-trans isomerase FKBP10	0.00949176	0.390127	0.408794
P15121	AKR1B1	Aldose reductase	-0.0187112	0.389988	0.408949
P26196	DDX6	Probable ATP-dependent RNA helicase DDX6	-0.00984975	0.389773	0.409189
P60983	GMFB	Glia maturation factor beta	-0.120227	0.38951	0.409482
P84085	ARF5	ADP-ribosylation factor 5	-0.0346738	0.389213	0.409813
Q9NQ29	LUC7L	Putative RNA-binding protein Luc7-like 1	0.0276904	0.389096	0.409943
P84243	H3-3A	Histone H3	0.0141521	0.388747	0.410333
Q9Y2E5	MAN2B2	Epididymis-specific alpha-mannosidase	0.0374336	0.38871	0.410375
Q9Y2R5	MRPS17	28S ribosomal protein S17, mitochondrial	-0.0901891	0.38859	0.410509
Q9BUF5	TUBB6	Tubulin beta-6 chain	-0.00556984	0.387066	0.412214
Q9NUU7	DDX19A	ATP-dependent RNA helicase DDX19A	-0.0208317	0.387025	0.412261
Q9BR39	JPH2	Junctophilin-2	0.0287345	0.386911	0.412389
Q99536	VAT1	Synaptic vesicle membrane protein VAT-1 homolog	-0.01068	0.38688	0.412423
Q5JTV8	TOR1AIP1	Torsin-1A-interacting protein 1	0.00624533	0.38665	0.412682
Q8NCA5	FAM98A	Protein FAM98A	-0.00739504	0.386543	0.412803
O60925	PFDN1	Prefoldin subunit 1	-0.0187532	0.386329	0.413043
O75400	PRPF40A	Pre-mRNA-processing factor 40 homolog A	-0.0239858	0.386219	0.413166
P48047	ATP5O	ATP synthase subunit O, mitochondrial	0.0136574	0.385678	0.413775
Q9HD33	MRPL47	39S ribosomal protein L47, mitochondrial	-0.0547792	0.385484	0.413994
Q9H299	SH3BGRL3	SH3 domain-binding glutamic acid-rich-like protein 3	-0.0130598	0.385393	0.414096
O00422	SAP18	Histone deacetylase complex subunit SAP18	-0.0541049	0.385255	0.414252
P30566	ADSL	Adenylosuccinate lyase	-0.0251849	0.384657	0.414926
P24539	ATP5F1	ATP synthase F(0) complex subunit B1, mitochondrial	0.0123526	0.383524	0.416207
P63092	GNAS	Guanine nucleotide-binding protein G(s) subunit alpha isoforms short	-0.0117647	0.382645	0.417204
P68400	CSNK2A1	Casein kinase II subunit alpha	0.0180939	0.38215	0.417766
P34059	GALNS	N-acetylgalactosamine-6-sulfatase	-0.0372125	0.381823	0.418138
P23921	RRM1	Ribonucleoside-diphosphate reductase large subunit	-0.0285302	0.381684	0.418296
P16401	HIST1H1B	Histone H1.5	0.0202672	0.381602	0.41839
P09234	SNRPC	U1 small nuclear ribonucleoprotein C	-0.0157888	0.380755	0.419354
P36543	ATP6V1E1	V-type proton ATPase subunit E 1	0.0118173	0.380747	0.419364
P05976	MYL1	Myosin light chain 1/3, skeletal muscle isoform	-0.0208094	0.380706	0.41941
Q6P587	FAHD1	Acylpyruvase FAHD1, mitochondrial	0.0245885	0.380299	0.419875
Q13347	EIF3I	Eukaryotic translation initiation factor 3 subunit I	-0.0151201	0.379582	0.420694
P29590	PML	Protein PML	0.0100071	0.379311	0.421004
P30048	PRDX3	Thioredoxin-dependent peroxide reductase, mitochondrial	-0.0165768	0.379244	0.421081
O00541	PES1	Pescadillo homolog	-0.0273589	0.379112	0.421232
Q9NQC3	RTN4	Reticulon-4	-0.10963	0.378842	0.421541
O75367	H2AFY	Core histone macro-H2A.1	0.0117248	0.378842	0.421542
P30085	CMPK1	UMP-CMP kinase	0.0180415	0.37825	0.422221
Q9UJ70	NAGK	N-acetyl-D-glucosamine kinase	-0.0196283	0.37824	0.422233
P25786	PSMA1	Proteasome subunit alpha type-1	0.0168596	0.377844	0.422688
P04083	ANXA1	Annexin A1	0.00767337	0.377717	0.422833
P19338	NCL	Nucleolin	0.00473976	0.376864	0.423815
Q86V48	LUZP1	Leucine zipper protein 1	0.055813	0.376419	0.424329
P20339	RAB5A	Ras-related protein Rab-5A	0.0178259	0.376383	0.42437
Q07666	KHDRBS1	KH domain-containing, RNA-binding, signal transduction-associated protein 1	0.0382244	0.374991	0.42598
P29966	MARCKS	Myristoylated alanine-rich C-kinase substrate	-0.0517857	0.374979	0.425993
P62906	RPL10A	60S ribosomal protein L10a	-0.00729736	0.374721	0.426292
P04216	THY1	Thy-1 membrane glycoprotein	0.00599798	0.374685	0.426333
P62861	FAU	40S ribosomal protein S30	-0.0234922	0.374273	0.426811
Q92973	TNPO1	Transportin-1	-0.014518	0.373518	0.427689
O95219	SNX4	Sorting nexin-4	-0.0186784	0.373377	0.427853
P51884	LUM	Lumican	-0.0400763	0.373127	0.428144
P51911	CNN1	Calponin-1	0.0729988	0.372237	0.42918
Q9NX20	MRPL16	39S ribosomal protein L16, mitochondrial	0.0592236	0.37218	0.429246
P51636	CAV2	Caveolin-2	-0.0253866	0.370595	0.4311
P55072	VCP	Transitional endoplasmic reticulum ATPase	-0.00953132	0.370492	0.431221
P07384	CAPN1	Calpain-1 catalytic subunit	-0.00623361	0.370345	0.431393
Q14112	NID2	Nidogen-2	-0.0312814	0.370036	0.431756
P35580	MYH10	Myosin-10	0.014458	0.369353	0.432559
Q9Y6C9	MTCH2	Mitochondrial carrier homolog 2	0.01742	0.369049	0.432916
P51151	RAB9A	Ras-related protein Rab-9A	0.0552477	0.36836	0.433728
Q13243	SRSF5	Serine/arginine-rich splicing factor 5	0.0427818	0.368281	0.433821
Q9NTK5	OLA1	Obg-like ATPase 1	-0.0137277	0.367566	0.434664
O60565	GREM1	Gremlin-1	-0.0496496	0.367337	0.434935
Q15365	PCBP1	Poly(rC)-binding protein 1	-0.0191944	0.366002	0.436516
Q9H1K1	ISCU	Iron-sulfur cluster assembly enzyme ISCU, mitochondrial	-0.0507839	0.365703	0.436872
P22105	TNXB	Tenascin-X	-0.0502391	0.36515	0.437528
Q86SX6	GLRX5	Glutaredoxin-related protein 5, mitochondrial	-0.0265574	0.365034	0.437667
Q14839	CHD4	Chromodomain-helicase-DNA-binding protein 4	0.0204509	0.364441	0.438373
P01033	TIMP1	Metalloproteinase inhibitor 1	-0.0397527	0.362841	0.440283
P28289	TMOD1	Tropomodulin-1	0.0121189	0.362838	0.440287
Q9NR45	NANS	Sialic acid synthase	0.0156483	0.36281	0.440321
Q92572	AP3S1	AP-3 complex subunit sigma-1	-0.0792807	0.362595	0.440578
P21980	TGM2	Protein-glutamine gamma-glutamyltransferase 2	0.0477351	0.362564	0.440616
P98160	HSPG2	Heparan Sulfate Proteoglycan 2	0.00610862	0.362458	0.440743
Q9Y2Q9	MRPS28	28S ribosomal protein S28, mitochondrial	0.0556417	0.361771	0.441566
Q7Z406	MYH14	Myosin-14	0.15485	0.361426	0.44198
Q15287	RNPS1	RNA-binding protein with serine-rich domain 1	0.0328594	0.361329	0.442097
Q9UKM7	MAN1B1	Endoplasmic reticulum mannosyl-oligosaccharide 1,2-alpha-mannosidase	-0.0409783	0.36123	0.442216
Q969N2	PIGT	GPI transamidase component PIG-T	0.0568524	0.360958	0.442543
Q7Z739	YTHDF3	YTH domain-containing family protein 3	0.0647873	0.360753	0.44279
Q8IVF2	AHNAK2	Protein AHNAK2	-0.0106329	0.359174	0.444695
Q8WWI5	SLC44A1	Choline transporter-like protein 1	-0.0273792	0.359053	0.444842
O95084	PRSS23	Serine protease 23	0.0741519	0.35867	0.445305
Q6PI48	DARS2	Aspartate--tRNA ligase, mitochondrial	0.0657676	0.358441	0.445582
Q8IY81	FTSJ3	pre-rRNA processing protein FTSJ3	0.0223972	0.357965	0.44616
P67812	SEC11A	Signal peptidase complex catalytic subunit SEC11A	0.0327203	0.357226	0.447057
Q9Y4W6	AFG3L2	AFG3-like protein 2	0.0228932	0.35707	0.447247
Q9Y623	MYH4	Myosin-4	-0.0583571	0.356267	0.448224
O00629	KPNA4	Importin subunit alpha-3	-0.014569	0.356233	0.448266
Q5VWP3	MLIP	Muscular LMNA-interacting protein	-0.0353249	0.356109	0.448417
O14639	ABLIM1	Actin-binding LIM protein 1	-0.0262265	0.355946	0.448616
P53597	SUCLG1	Succinyl-CoA ligase [ADP/GDP-forming] subunit alpha, mitochondrial	0.0254997	0.355659	0.448966
Q9NR12	PDLIM7	PDZ and LIM domain protein 7	0.0276273	0.355563	0.449083
P07919	UQCRH	Cytochrome b-c1 complex subunit 6, mitochondrial	-0.0916593	0.355387	0.449299
P17405	SMPD1	Sphingomyelin phosphodiesterase	-0.0403894	0.355151	0.449587
P10412	HIST1H1	Histone H1	0.0566065	0.354751	0.450076
Q8N684	CPSF7	Cleavage and polyadenylation specificity factor subunit 7	0.0795057	0.354681	0.450162
Q96DH6	MSI2	RNA-binding protein Musashi homolog 2	0.0471519	0.354406	0.450499
Q7Z6Z7	HUWE1	E3 ubiquitin-protein ligase HUWE1	-0.0129121	0.354027	0.450964
Q9NRV9	HEBP1	Heme-binding protein 1	-0.043962	0.353648	0.451429
P09493	TPM1	Tropomyosin alpha-1 chain	0.0607189	0.353445	0.451678
P46060	RANGAP1	Ran GTPase-activating protein 1	-0.0696533	0.352708	0.452585
O15254	ACOX3	Peroxisomal acyl-coenzyme A oxidase 3	0.0265807	0.351935	0.453538
Q5VST9	OBSCN	Obscurin	-0.0231891	0.351257	0.454375
O14983	ATP2A1	Sarcoplasmic/endoplasmic reticulum calcium ATPase 1	-0.0526179	0.35117	0.454483
P15291	B4GALT1	Beta-1,4-galactosyltransferase 1	0.0262216	0.351098	0.454572
P16035	TIMP2	Metalloproteinase inhibitor 2	0.015441	0.350348	0.4555
O95793	STAU1	Double-stranded RNA-binding protein Staufen homolog 1	-0.0140342	0.349633	0.456387
Q92616	GCN1L1	Translational activator GCN1	-0.0141919	0.349503	0.456549
Q9BW60	ELOVL1	Elongation of very long chain fatty acids protein 1	0.0167443	0.349021	0.457149
Q63ZY3	KANK2	KN motif and ankyrin repeat domain-containing protein 2	-0.0150901	0.348968	0.457214
Q9H307	PNN	Pinin	0.0502885	0.348656	0.457603
Q8IXB1	DNAJC10	DnaJ homolog subfamily C member 10	0.0146361	0.348508	0.457787
P05386	RPLP1	60S acidic ribosomal protein P1	-0.00718718	0.348151	0.458232
P20042	EIF2S2	Eukaryotic translation initiation factor 2 subunit 2	0.0360278	0.347997	0.458425
Q9HC38	GLOD4	Glyoxalase domain-containing protein 4	-0.0584971	0.347637	0.458874
Q562R1	ACTBL2	Beta-actin-like protein 2	-0.0725087	0.347604	0.458915
P07686	HEXB	Beta-hexosaminidase subunit beta	0.0121201	0.347485	0.459064
Q9UKK3	PARP4	Poly [ADP-ribose] polymerase 4	-0.0441929	0.346127	0.460764
Q9HC35	EML4	Echinoderm microtubule-associated protein-like 4	0.0373843	0.345506	0.461545
Q9NVP1	DDX18	ATP-dependent RNA helicase DDX18	-0.0144269	0.345175	0.461961
P52209	PGD	6-phosphogluconate dehydrogenase, decarboxylating	-0.0108388	0.345141	0.462004
P17302	GJA1	Gap junction alpha-1 protein	0.0521993	0.344859	0.462358
Q9UBS4	DNAJB11	DnaJ homolog subfamily B member 11	0.0392126	0.344801	0.462432
Q9BZL4	PPP1R12C	Protein phosphatase 1 regulatory subunit 12C	-0.0618825	0.344543	0.462757
Q00577	PURA	Transcriptional activator protein Pur-alpha	-0.0391065	0.344286	0.463081
P06703	S100A6	Protein S100-A6	-0.0395615	0.344036	0.463396
Q9UMX0	UBQLN1	Ubiquilin-1	-0.0584609	0.342917	0.464811
Q8WZ42	TTN	Titin	-0.0612761	0.341962	0.466022
P35475	IDUA	Alpha-L-iduronidase	-0.0222021	0.341353	0.466796
Q9BX68	HINT2	Histidine triad nucleotide-binding protein 2, mitochondrial	0.0144457	0.341113	0.467102
Q12805	EFEMP1	EGF-containing fibulin-like extracellular matrix protein 1	-0.05077	0.340301	0.468137
P12883	MYH7	Myosin-7	-0.0185683	0.340147	0.468333
O00461	GOLIM4	Golgi integral membrane protein 4	0.0104104	0.339817	0.468755
O00442	RTCA	RNA 3-terminal phosphate cyclase	-0.0819452	0.339743	0.46885
Q15124	PGM5	Phosphoglucomutase-like protein 5	0.0440957	0.339541	0.469108
O75880	SCO1	Protein SCO1 homolog, mitochondrial	0.0319252	0.339381	0.469312
Q16706	MAN2A1	Alpha-mannosidase 2	0.0419034	0.339102	0.46967
Q8IYB3	SRRM1	Serine/arginine repetitive matrix protein 1	-0.0350853	0.339082	0.469695
Q9Y3A5	SBDS	Ribosome maturation protein SBDS	-0.0109934	0.338965	0.469845
Q9Y265	RUVBL1	RuvB-like 1	0.0127008	0.338834	0.470013
Q96PK6	RBM14	RNA-binding protein 14	0.0253332	0.338802	0.470054
P13797	PLS3	Plastin-3	-0.0239973	0.33873	0.470146
Q9BWM7	SFXN3	Sideroflexin-3	0.0154647	0.33848	0.470467
P29144	TPP2	Tripeptidyl-peptidase 2	-0.0346528	0.338478	0.470469
Q9H8Y8	GORASP2	Golgi reassembly-stacking protein 2	0.0384099	0.337726	0.471435
Q16181	SEP7	Septin-7	-0.0100216	0.337648	0.471536
P84095	RHOG	Rho-related GTP-binding protein RhoG	0.020855	0.337318	0.471961
Q9Y6X5	ENPP4	Bis(5-adenosyl)-triphosphatase ENPP4	0.0547882	0.337237	0.472064
P04075	ALDOA	Fructose-bisphosphate aldolase A	-0.0153075	0.337222	0.472084
Q96I24	FUBP3	Far upstream element-binding protein 3	0.00730339	0.336588	0.472901
Q9BQS8	FYCO1	FYVE and coiled-coil domain-containing protein 1	-0.0300773	0.336563	0.472933
Q13326	SGCG	Gamma-sarcoglycan	0.0889089	0.336432	0.473103
P07900	HSP90AA1	Heat shock protein HSP 90-alpha	-0.00963761	0.336378	0.473173
Q8TED1	GPX8	Probable glutathione peroxidase 8	0.00532324	0.335883	0.473812
Q9BTU6	PI4K2A	Phosphatidylinositol 4-kinase type 2-alpha	0.0161906	0.335636	0.474132
P10809	HSPD1	60 kDa heat shock protein, mitochondrial	0.0134427	0.334959	0.475008
Q10567	AP1B1	AP-1 complex subunit beta-1	-0.0434333	0.334761	0.475266
Q9P0I2	EMC3	ER membrane protein complex subunit 3	0.0610743	0.3347	0.475344
P15880	RPS2	40S ribosomal protein S2	-0.0150339	0.334363	0.475782
P25789	PSMA4	Proteasome subunit alpha type-4	0.107463	0.334281	0.475888
Q13098	GPS1	COP9 signalosome complex subunit 1	-0.0115623	0.333999	0.476255
O14979	HNRNPDL	Heterogeneous nuclear ribonucleoprotein D-like	0.0304386	0.333928	0.476348
Q9HBL7	PLGRKT	Plasminogen receptor (KT)	-0.117357	0.333823	0.476483
Q16204	CCDC6	Coiled-coil domain-containing protein 6	-0.0416844	0.333819	0.476489
Q9HCC0	MCCC2	Methylcrotonoyl-CoA carboxylase beta chain, mitochondrial	0.0260287	0.33359	0.476786
Q9H9H4	VPS37B	Vacuolar protein sorting-associated protein 37B	0.0589905	0.332858	0.477741
Q99459	CDC5L	Cell division cycle 5-like protein	0.017555	0.332697	0.477951
Q9BPX5	ARPC5L	Actin-related protein 2/3 complex subunit 5-like protein	-0.060518	0.332636	0.478031
Q96RF0	SNX18	Sorting nexin-18	-0.0721111	0.332266	0.478515
Q6DKI1	RPL7L1	60S ribosomal protein L7-like 1	0.0402966	0.331798	0.479126
O75438	NDUFB1	NADH dehydrogenase [ubiquinone] 1 beta subcomplex subunit 1	-0.100889	0.331741	0.4792
P27449	ATP6V0C	V-type proton ATPase 16 kDa proteolipid subunit	-0.0771001	0.33172	0.479228
P22087	FBL	rRNA 2-O-methyltransferase fibrillarin	0.015796	0.331578	0.479414
Q9GZT3	SLIRP	SRA stem-loop-interacting RNA-binding protein, mitochondrial	0.00606468	0.33148	0.479543
O00139	KIF2A	Kinesin-like protein KIF2A	-0.0118383	0.331098	0.480043
P38159	RBMX	RNA-binding motif protein, X chromosome	0.00781838	0.330881	0.480328
Q09013	DMPK	Myotonin-protein kinase	-0.0851878	0.330124	0.481322
P11216	PYGB	Glycogen phosphorylase, brain form	-0.0201012	0.330092	0.481366
O60220	TIMM8A	Mitochondrial import inner membrane translocase subunit Tim8 A	0.0475565	0.329898	0.481621
Q4G0F5	VPS26B	Vacuolar protein sorting-associated protein 26B	-0.046928	0.329826	0.481715
Q8IWA5	SLC44A2	Choline transporter-like protein 2	-0.0777287	0.329266	0.482454
Q96DI7	SNRNP40	U5 small nuclear ribonucleoprotein 40 kDa protein	0.0184055	0.329034	0.482759
P62191	PSMC1	26S protease regulatory subunit 4	0.0214658	0.328993	0.482814
P14324	FDPS	Farnesyl pyrophosphate synthase	0.0367397	0.328889	0.48295
Q14152	EIF3A	Eukaryotic translation initiation factor 3 subunit A	-0.00899894	0.327529	0.48475
O43707	ACTN4	Alpha-actinin-4	-0.016014	0.327199	0.485188
P27708	CAD	CAD protein	-0.0236397	0.326702	0.485848
Q16540	MRPL23	39S ribosomal protein L23, mitochondrial	0.0594023	0.326538	0.486066
Q9UPQ0	LIMCH1	LIM and calponin homology domains-containing protein 1	-0.0285517	0.326375	0.486283
P62937	PPIA	Peptidyl-prolyl cis-trans isomerase A	-0.0178326	0.326245	0.486456
Q13641	TPBG	Trophoblast glycoprotein	0.106189	0.325992	0.486793
Q06323	PSME1	Proteasome activator complex subunit 1	-0.0815863	0.325949	0.486851
Q12797	ASPH	Aspartyl/asparaginyl beta-hydroxylase	0.0148422	0.325829	0.487011
Q6PGP7	TTC37	Tetratricopeptide repeat protein 37	-0.0208998	0.32568	0.487209
P10253	GAA	Lysosomal alpha-glucosidase	-0.0076134	0.325627	0.487279
Q8N8Y2	ATP6V0D2	V-type proton ATPase subunit d 2	0.104761	0.325482	0.487473
Q13144	EIF2B5	Translation initiation factor eIF-2B subunit epsilon	-0.0587025	0.32539	0.487595
Q9H444	CHMP4B	Charged multivesicular body protein 4b	-0.0858905	0.324494	0.488793
Q96DB5	RMDN1	Regulator of microtubule dynamics protein 1	0.0268159	0.323762	0.489774
P48163	ME1	NADP-dependent malic enzyme	-0.0601259	0.323459	0.490181
Q32MZ4	LRRFIP1	Leucine-rich repeat flightless-interacting protein 1	-0.0675208	0.323456	0.490185
P07711	CTSL	Cathepsin L1	-0.107121	0.323216	0.490507
Q12792	TWF1	Twinfilin-1	0.00871548	0.322842	0.49101
Q99816	TSG101	Tumor susceptibility gene 101 protein	-0.032462	0.322196	0.49188
Q0ZGT2	NEXN	Nexilin	0.0140282	0.322029	0.492105
Q70UQ0	IKBIP	Inhibitor of nuclear factor kappa-B kinase-interacting protein	0.0245742	0.321302	0.493087
Q9H0A0	NAT10	N-acetyltransferase 10	-0.0088708	0.320806	0.493758
P62879	GNB2	Guanine nucleotide-binding protein G(I)/G(S)/G(T) subunit beta-2	0.0176698	0.320684	0.493923
P61803	DAD1	Dolichyl-diphosphooligosaccharide--protein glycosyltransferase subunit DAD1	-0.0951497	0.31997	0.494891
Q08257	CRYZ	Quinone oxidoreductase	0.0104181	0.319287	0.495819
P51553	IDH3G	Isocitrate dehydrogenase [NAD] subunit gamma, mitochondrial	0.0241164	0.318491	0.496903
Q9H9B4	SFXN1	Sideroflexin-1	0.020399	0.318112	0.49742
P07437	TUBB	Tubulin beta chain	-0.0140625	0.318059	0.497492
Q9BUR5	APOO	Apolipoprotein O	-0.0181981	0.317738	0.497931
Q6UB35	MTHFD1L	Monofunctional C1-tetrahydrofolate synthase, mitochondrial	0.0273368	0.317067	0.498849
Q07866	KLC1	Kinesin light chain 1	-0.051744	0.3163	0.499901
Q9BYG3	NIFK	MKI67 FHA domain-interacting nucleolar phosphoprotein	-0.0505658	0.316146	0.500112
Q9NR99	MXRA5	Matrix-remodeling-associated protein 5	-0.0883434	0.316088	0.500192
P48960	CD97	CD97 antigen	0.0114524	0.315858	0.500508
Q99436	PSMB7	Proteasome subunit beta type-7	-0.0545225	0.314193	0.502803
Q99719	SEP5	Septin-5	0.0418474	0.313789	0.503362
Q9Y625	GPC6	Glypican-6	0.0463733	0.313391	0.503914
Q9Y680	FKBP7	Peptidyl-prolyl cis-trans isomerase FKBP7	0.00748721	0.313384	0.503923
Q9Y2U8	LEMD3	Inner nuclear membrane protein Man1	0.0813573	0.312936	0.504544
Q12841	FSTL1	Follistatin-related protein 1	-0.0514778	0.312842	0.504675
P08962	CD63	CD63 antigen	0.0271366	0.312739	0.504817
Q86VP6	CAND1	Cullin-associated NEDD8-dissociated protein 1	-0.0209764	0.312494	0.505158
P51452	DUSP3	Dual specificity protein phosphatase 3	0.0521367	0.311297	0.506825
P49257	LMAN1	Protein ERGIC-53	0.0180848	0.310458	0.507997
P08195	SLC3A2	4F2 cell-surface antigen heavy chain	0.0183281	0.310312	0.508202
P28300	LOX	Protein-lysine 6-oxidase	0.0177914	0.309836	0.508868
Q53TN4	CYBRD1	Cytochrome b reductase 1	-0.0840328	0.309297	0.509625
O00425	IGF2BP3	Insulin-like growth factor 2 mRNA-binding protein 3	0.020708	0.308746	0.510398
P56556	NDUFA6	NADH dehydrogenase [ubiquinone] 1 alpha subcomplex subunit 6	0.0320627	0.308562	0.510658
Q9Y639	NPTN	Neuroplastin	-0.0977119	0.308315	0.511005
Q16134	ETFDH	Electron transfer flavoprotein-ubiquinone oxidoreductase, mitochondrial	-0.0845881	0.307503	0.512151
P01034	CST3	Cystatin-C	-0.0760121	0.307135	0.51267
O76094	SRP72	Signal recognition particle subunit SRP72	-0.0445845	0.306368	0.513757
P11055	MYH3	Myosin-3	-0.0172648	0.3062	0.513994
O14569	CYB561D2	Cytochrome b561 domain-containing protein 2	-0.0327634	0.305976	0.514313
P30419	NMT1	Glycylpeptide N-tetradecanoyltransferase 1	-0.0288197	0.305908	0.514409
Q7Z2W4	ZC3HAV1	Zinc finger CCCH-type antiviral protein 1	-0.0189382	0.30581	0.514548
P17096	HMGA1	High mobility group protein HMG-I/HMG-Y	0.0347248	0.305807	0.514552
O94973	AP2A2	AP-2 complex subunit alpha-2	-0.0444561	0.305292	0.515284
Q99797	MIPEP	Mitochondrial intermediate peptidase	-0.0499997	0.304952	0.515769
Q9NX63	CHCHD3	MICOS complex subunit MIC19	0.00759115	0.304916	0.51582
Q14103	HNRNPD	Heterogeneous nuclear ribonucleoprotein D0	-0.00683178	0.304898	0.515846
Q96HY6	DDRGK1	DDRGK domain-containing protein 1	0.0345693	0.304807	0.515975
O60832	DKC1	H/ACA ribonucleoprotein complex subunit 4	0.0194523	0.304789	0.516001
Q9UBB4	ATXN10	Ataxin-10	-0.0400786	0.304725	0.516091
Q9H8S9	MOB1A	MOB kinase activator 1A	-0.0508665	0.304479	0.516443
O75923	DYSF	Dysferlin	0.0145653	0.303971	0.517168
P08253	MMP2	72 kDa type IV collagenase	0.0257867	0.303938	0.517215
Q9NRX5	SERINC1	Serine incorporator 1	0.0732943	0.303305	0.51812
Q9H0Q0	FAM49A	Protein FAM49A	-0.0483179	0.303149	0.518344
Q9Y3D3	MRPS16	28S ribosomal protein S16, mitochondrial	-0.0477166	0.302437	0.519365
P60228	EIF3E	Eukaryotic translation initiation factor 3 subunit E	0.0308011	0.30079	0.521737
Q9BXJ9	NAA15	N-alpha-acetyltransferase 15, NatA auxiliary subunit	-0.0742276	0.300776	0.521757
Q86UP2	KTN1	Kinectin	0.0229549	0.3007	0.521867
O14964	HGS	Hepatocyte growth factor-regulated tyrosine kinase substrate	-0.060804	0.300349	0.522374
O00567	NOP56	Nucleolar protein 56	-0.00327813	0.300119	0.522707
P78406	RAE1	mRNA export factor	-0.0695235	0.299182	0.524065
P82663	MRPS25	28S ribosomal protein S25, mitochondrial	-0.0709155	0.299143	0.524121
P21912	SDHB	Succinate dehydrogenase [ubiquinone] iron-sulfur subunit, mitochondrial	0.0190636	0.298361	0.525257
Q9Y4I1	MYO5A	Unconventional myosin-Va	-0.0368101	0.297758	0.526137
Q9NWU5	MRPL22	39S ribosomal protein L22, mitochondrial	-0.0644075	0.296793	0.527546
Q9UJY1	HSPB8	Heat shock protein beta-8	-0.0298791	0.296759	0.527596
O96005	CLPTM1	Cleft lip and palate transmembrane protein 1	0.0214435	0.296725	0.527646
Q14008	CKAP5	Cytoskeleton-associated protein 5	-0.0415535	0.296581	0.527856
Q96KA5	CLPTM1L	Cleft lip and palate transmembrane protein 1-like protein	-0.00587309	0.296566	0.527879
P06737	PYGL	Glycogen phosphorylase, liver form	-0.0266909	0.296304	0.528262
P52294	KPNA1	Importin subunit alpha-5	-0.0684422	0.295624	0.52926
P13674	P4HA1	Prolyl 4-hydroxylase subunit alpha-1	0.15039	0.2955	0.529443
Q96EK6	GNPNAT1	Glucosamine 6-phosphate N-acetyltransferase	-0.007204	0.294942	0.530264
Q9P0J0	NDUFA13	NADH dehydrogenase [ubiquinone] 1 alpha subcomplex subunit 13	0.00709975	0.294729	0.530577
P17568	NDUFB7	NADH dehydrogenase [ubiquinone] 1 beta subcomplex subunit 7	-0.0703827	0.294514	0.530895
Q4G0J3	LARP7	La-related protein 7	-0.0232195	0.294156	0.531422
P82673	MRPS35	28S ribosomal protein S35, mitochondrial	0.0736224	0.293943	0.531737
P14550	AKR1A1	Alcohol dehydrogenase [NADP(+)]	-0.017187	0.293735	0.532045
Q9UBV2	SEL1L	Protein sel-1 homolog 1	0.0211807	0.292921	0.533249
Q96KR1	ZFR	Zinc finger RNA-binding protein	0.0177278	0.292551	0.533798
Q13126	MTAP	S-methyl-5-thioadenosine phosphorylase	-0.0692373	0.292379	0.534054
O43504	LAMTOR5	Ragulator complex protein LAMTOR5	0.0109193	0.291992	0.534629
Q13619	CUL4A	Cullin-4A	-0.0580246	0.291961	0.534676
Q9BUP0	EFHD1	EF-hand domain-containing protein D1	-0.0581934	0.291789	0.534931
P51149	RAB7A	Ras-related protein Rab-7a	0.00409619	0.29169	0.535078
P13929	ENO3	Beta-enolase	-0.0135484	0.291569	0.535258
Q15019	SEP2	Septin-2	-0.00633077	0.291126	0.535919
Q8TAQ2	SMARCC2	SWI/SNF complex subunit SMARCC2	0.0287363	0.290865	0.536309
Q9Y4G6	TLN2	Talin-2	0.043879	0.29076	0.536466
Q8WUD1	RAB2B	Ras-related protein Rab-2B	0.069013	0.290444	0.536937
Q4V9L6	TMEM119	Transmembrane protein 119	0.0318008	0.290201	0.537301
Q9UBQ7	GRHPR	Glyoxylate reductase/hydroxypyruvate reductase	0.0192021	0.289425	0.538464
P17987	TCP1	T-complex protein 1 subunit alpha	-0.0133777	0.289002	0.539099
P28482	MAPK1	Mitogen-activated protein kinase 1	-0.0208601	0.288747	0.539482
P61421	ATP6V0D1	V-type proton ATPase subunit d 1	0.0327179	0.288215	0.540284
P45973	CBX5	Chromobox protein homolog 5	-0.0870363	0.287685	0.541083
Q9NVZ3	NECAP2	Adaptin ear-binding coat-associated protein 2	-0.0639655	0.286499	0.542877
Q9C0C2	TNKS1BP1	182 kDa tankyrase-1-binding protein	-0.00770588	0.286107	0.543471
O00483	NDUFA4	Cytochrome c oxidase subunit NDUFA4	-0.0452572	0.286017	0.543608
Q9Y2Z0	SUGT1	Suppressor of G2 allele of SKP1 homolog	-0.0205044	0.285068	0.545051
P63220	RPS21	40S ribosomal protein S21	-0.00656675	0.28492	0.545277
O43493	TGOLN2	Trans-Golgi network integral membrane protein 2	-0.0483208	0.28491	0.545292
O43852	CALU	Calumenin	0.0505686	0.284814	0.545438
Q16774	GUK1	Guanylate kinase	0.0318735	0.284492	0.54593
Q7Z2W9	MRPL21	39S ribosomal protein L21, mitochondrial	0.0542237	0.284435	0.546016
P14868	DARS	Aspartate--tRNA ligase, cytoplasmic	-0.00861143	0.284389	0.546087
Q8IUD2	ERC1	ELKS/Rab6-interacting/CAST family member 1	-0.0427339	0.284199	0.546378
Q99985	SEMA3C	Semaphorin-3C	0.0185318	0.284083	0.546556
Q9Y320	TMX2	Thioredoxin-related transmembrane protein 2	-0.0387633	0.283644	0.547226
Q7L311	ARMCX2	Armadillo repeat-containing X-linked protein 2	-0.0694865	0.283593	0.547305
Q92945	KHSRP	Far upstream element-binding protein 2	0.0272861	0.282971	0.548259
P62877	RBX1	E3 ubiquitin-protein ligase RBX1	-0.0135926	0.282824	0.548484
Q9UHB9	SRP68	Signal recognition particle subunit SRP68	-0.00979163	0.282723	0.548638
P54578	USP14	Ubiquitin carboxyl-terminal hydrolase 14	-0.0438678	0.282406	0.549126
Q6FI81	CIAPIN1	Anamorsin	-0.08226	0.281932	0.549856
Q8IX30	SCUBE3	Signal peptide, CUB and EGF-like domain-containing protein 3	-0.0623029	0.281806	0.55005
P62888	RPL30	60S ribosomal protein L30	-0.0229608	0.281651	0.550289
P22570	FDXR	NADPH:adrenodoxin oxidoreductase, mitochondrial	0.0113399	0.280792	0.551616
Q9UKX2	MYH2	Myosin-2	-0.0150334	0.280626	0.551872
Q01085	TIAL1	Nucleolysin TIAR	0.0134515	0.280146	0.552615
Q96DZ1	ERLEC1	Endoplasmic reticulum lectin 1	-0.0630603	0.2797	0.553308
P04406	GAPDH	Glyceraldehyde-3-phosphate dehydrogenase	-0.0129083	0.279486	0.55364
Q96S52	PIGS	GPI transamidase component PIG-S	0.0193923	0.27926	0.553991
P48681	NES	Nestin	-0.0215725	0.279145	0.554169
O95486	SEC24A	Protein transport protein Sec24A	-0.033519	0.278948	0.554477
Q15029	EFTUD2	116 kDa U5 small nuclear ribonucleoprotein component	0.024335	0.27862	0.554988
Q96A72	MAGOHB	Protein mago nashi homolog 2	-0.0656443	0.278261	0.555548
Q15738	NSDHL	Sterol-4-alpha-carboxylate 3-dehydrogenase, decarboxylating	-0.0107027	0.277945	0.556041
P16989	YBX3	Y-box-binding protein 3	0.0267669	0.277706	0.556414
P10155	TROVE2	60 kDa SS-A/Ro ribonucleoprotein	0.0148778	0.277531	0.556689
P02751	FN1	Fibronectin	0.0227158	0.277082	0.557391
P05026	ATP1B1	Sodium/potassium-transporting ATPase subunit beta-1	-0.0630737	0.276856	0.557746
P84157	MXRA7	Matrix-remodeling-associated protein 7	0.0735891	0.276826	0.557793
P00846	MT-ATP6	ATP synthase subunit a	-0.0202521	0.276155	0.558847
O95104	SCAF4	Splicing factor, arginine/serine-rich 15	0.0557608	0.275838	0.559346
Q9Y2Q5	LAMTOR2	Ragulator complex protein LAMTOR2	0.0668711	0.275701	0.559561
P08758	ANXA5	Annexin A5	-0.00382648	0.274687	0.561162
Q13438	OS9	Protein OS-9	-0.0418538	0.274574	0.56134
Q15036	SNX17	Sorting nexin-17	0.157763	0.274486	0.56148
O75352	MPDU1	Mannose-P-dolichol utilization defect 1 protein	0.137523	0.274408	0.561603
O15511	ARPC5	Actin-related protein 2/3 complex subunit 5	0.0386801	0.273985	0.562273
P45974	USP5	Ubiquitin carboxyl-terminal hydrolase 5	-0.0113448	0.273982	0.562278
Q12996	CSTF3	Cleavage stimulation factor subunit 3	0.0377187	0.273851	0.562486
Q9UNK0	STX8	Syntaxin-8	-0.0695479	0.272904	0.563991
Q14974	KPNB1	Importin subunit beta-1	-0.010778	0.272305	0.564945
Q8IY95	TMEM192	Transmembrane protein 192	0.15196	0.271767	0.565804
P50579	METAP2	Methionine aminopeptidase 2	-0.0517406	0.271609	0.566056
Q9BYD2	MRPL9	39S ribosomal protein L9, mitochondrial	0.0575436	0.271482	0.566258
P15559	NQO1	NAD(P)H dehydrogenase [quinone] 1	-0.0145705	0.271109	0.566856
Q9BRR6	ADPGK	ADP-dependent glucokinase	0.0189317	0.271105	0.566862
Q02252	ALDH6A1	Methylmalonate-semialdehyde dehydrogenase [acylating], mitochondrial	0.0139164	0.271095	0.566879
P17858	PFKL	ATP-dependent 6-phosphofructokinase, liver type	-0.0169363	0.270661	0.567575
P51991	HNRNPA3	Heterogeneous nuclear ribonucleoprotein A3	0.0107467	0.270599	0.567674
Q12988	HSPB3	Heat shock protein beta-3	0.0240442	0.270531	0.567784
Q15477	SKIV2L	Helicase SKI2W	-0.0379068	0.269323	0.569726
Q96JB5	CDK5RAP3	CDK5 regulatory subunit-associated protein 3	0.0409946	0.269289	0.569781
P62136	PPP1CA	Serine/threonine-protein phosphatase PP1-alpha catalytic subunit	0.0129991	0.269282	0.569793
Q9BRK3	MXRA8	Matrix-remodeling-associated protein 8	-0.0595419	0.26928	0.569795
O75822	EIF3J	Eukaryotic translation initiation factor 3 subunit J	-0.0839181	0.268998	0.570251
Q15751	HERC1	Probable E3 ubiquitin-protein ligase HERC1	0.121532	0.268565	0.57095
O94874	UFL1	E3 UFM1-protein ligase 1	0.0178705	0.268035	0.571809
O75915	ARL6IP5	PRA1 family protein 3	-0.0298134	0.267953	0.571941
P48735	IDH2	Isocitrate dehydrogenase [NADP], mitochondrial	0.0118428	0.267862	0.572089
O75112	LDB3	LIM domain-binding protein 3	0.0189399	0.267756	0.572261
P20700	LMNB1	Lamin-B1	0.0100287	0.267723	0.572314
Q92643	PIGK	GPI-anchor transamidase	0.0309479	0.267336	0.572942
P20340	RAB6A	Ras-related protein Rab-6A	0.0137229	0.266195	0.5748
Q9NZL4	HSPBP1	Hsp70-binding protein 1	0.123567	0.266038	0.575057
O14558	HSPB6	Heat shock protein beta-6	-0.0687885	0.26556	0.575838
Q9UHA4	LAMTOR3	Ragulator complex protein LAMTOR3	0.0147266	0.265197	0.576432
O60504	SORBS3	Vinexin	-0.0408017	0.264695	0.577254
P40429	RPL13A	60S ribosomal protein L13a	-0.0207859	0.264254	0.577978
Q86XP3	DDX42	ATP-dependent RNA helicase DDX42	0.0671693	0.263764	0.578784
O75369	FLNB	Filamin-B	-0.0486602	0.263486	0.579243
Q9UNS2	COPS3	COP9 signalosome complex subunit 3	-0.0134043	0.263309	0.579534
P22392	NME2	Nucleoside diphosphate kinase B	-0.0121566	0.26285	0.580293
Q96G23	CERS2	Ceramide synthase 2	0.00699774	0.262733	0.580486
Q5IS74	TPP1	Tripeptidyl-peptidase 1	0.0153111	0.262528	0.580824
Q969V3	NCLN	Nicalin	0.0207238	0.262487	0.580892
P09211	GSTP1	Glutathione S-transferase P	-0.0135337	0.26221	0.581351
P33240	CSTF2	Cleavage stimulation factor subunit 2	0.071587	0.261362	0.582757
P49721	PSMB2	Proteasome subunit beta type-2	-0.0572847	0.260724	0.583819
O43776	NARS	Asparagine--tRNA ligase, cytoplasmic	-0.00971777	0.260459	0.584261
Q96CX2	KCTD12	BTB/POZ domain-containing protein KCTD12	0.0185299	0.260283	0.584554
Q9BVG9	PTDSS2	Phosphatidylserine synthase 2	0.1088	0.260169	0.584744
P60028	GDI1	Rab GDP dissociation inhibitor alpha	-0.0255403	0.259895	0.585202
Q15526	SURF1	Surfeit locus protein 1	0.0436048	0.259866	0.58525
Q14344	GNA13	Guanine nucleotide-binding protein subunit alpha-13	0.124923	0.258801	0.587034
P36551	CPOX	Oxygen-dependent coproporphyrinogen-III oxidase, mitochondrial	0.0524442	0.258673	0.587249
P82914	MRPS15	28S ribosomal protein S15, mitochondrial	0.0422786	0.258399	0.587709
Q92542	NCSTN	Nicastrin	-0.0408767	0.258154	0.588121
O95373	IPO7	Importin-7	-0.0519895	0.257927	0.588503
Q99733	NAP1L4	Nucleosome assembly protein 1-like 4	-0.101864	0.257853	0.588629
Q96BP2	CHCHD1	Coiled-coil-helix-coiled-coil-helix domain-containing protein 1	0.159667	0.257428	0.589345
Q9BTZ2	DHRS4	Dehydrogenase/reductase SDR family member 4	0.00828759	0.257361	0.589458
Q9Y371	SH3GLB1	Endophilin-B1	-0.0339159	0.257299	0.589561
Q9NUP9	LIN7C	Protein lin-7 homolog C	-0.065396	0.256615	0.590719
P01344	IGF2	Insulin-like growth factor II	0.0542528	0.256397	0.591087
Q9Y2J2	EPB41L3	Band 4.1-like protein 3	0.0101309	0.256199	0.591422
Q13555	CAMK2G	Calcium/calmodulin-dependent protein kinase type II subunit gamma	0.0614786	0.256026	0.591717
P36957	DLST	Dihydrolipoyllysine-residue succinyltransferase component of 2-oxoglutarate dehydrogenase complex, mitochondrial	-0.0843606	0.255588	0.592459
Q2TAY7	SMU1	WD40 repeat-containing protein SMU1	0.0437337	0.255121	0.593255
Q13155	AIMP2	Aminoacyl tRNA synthase complex-interacting multifunctional protein 2	-0.0298098	0.255066	0.593348
P42574	CASP3	Caspase-3	-0.0476052	0.254746	0.593893
Q15061	WDR43	WD repeat-containing protein 43	0.040919	0.254724	0.59393
P49903	SEPHS1	Selenide, water dikinase 1	0.0168971	0.254207	0.594812
Q86TD4	SRL	Sarcalumenin	-0.0422608	0.253278	0.596403
P21333	FLNA	Filamin-A	-0.0169083	0.253075	0.596751
Q68CZ2	TNS3	Tensin-3	-0.0850446	0.252549	0.597654
O14776	TCERG1	Transcription elongation regulator 1	-0.0545672	0.252524	0.597698
O95249	GOSR1	Golgi SNAP receptor complex member 1	-0.0242972	0.252002	0.598595
O00161	SNAP23	Synaptosomal-associated protein 23	-0.00859257	0.251913	0.59875
Q8TBA6	GOLGA5	Golgin subfamily A member 5	0.0592394	0.251833	0.598887
Q9UBT2	UBA2	SUMO-activating enzyme subunit 2	0.0407958	0.251816	0.598916
Q02818	NUCB1	Nucleobindin-1	0.0121704	0.250728	0.600798
P00966	ASS1	Argininosuccinate synthase	-0.0529988	0.250706	0.600835
P30740	SERPINB1	Leukocyte elastase inhibitor	-0.030087	0.250375	0.601408
O00154	ACOT7	Cytosolic acyl coenzyme A thioester hydrolase	0.0336294	0.250164	0.601775
Q96KP4	CNDP2	Cytosolic non-specific dipeptidase	-0.0775576	0.249887	0.602257
P08579	SNRPB2	U2 small nuclear ribonucleoprotein B	-0.0594764	0.249884	0.602262
Q14767	LTBP2	Latent-transforming growth factor beta-binding protein 2	0.0398029	0.249226	0.603407
P18084	ITGB5	Integrin beta-5	0.028629	0.249055	0.603704
P30086	PEBP1	Phosphatidylethanolamine-binding protein 1	-0.0161926	0.248466	0.604732
Q15181	PPA1	Inorganic pyrophosphatase	0.0707178	0.248322	0.604984
P42330	AKR1C3	Aldo-keto reductase family 1 member C3	-0.0363887	0.248286	0.605048
Q9H845	ACAD9	Acyl-CoA dehydrogenase family member 9, mitochondrial	0.02238	0.248239	0.60513
P50895	BCAM	Basal cell adhesion molecule	0.0273258	0.24778	0.605933
P16615	ATP2A2	Sarcoplasmic/endoplasmic reticulum calcium ATPase 2	0.0145552	0.247694	0.606085
P23142	FBLN1	Fibulin-1	0.114574	0.247685	0.6061
Q9UBC2	EPS15L1	Epidermal growth factor receptor substrate 15-like 1	-0.0719812	0.247682	0.606106
P35080	PFN2	Profilin-2	-0.136522	0.247462	0.606491
P07942	LAMB1	Laminin subunit beta-1	0.0302227	0.246927	0.607432
Q15382	RHEB	GTP-binding protein Rheb	0.0710195	0.246636	0.607943
P28074	PSMB5	Proteasome subunit beta type-5	0.0249381	0.246235	0.60865
P00558	PGK1	Phosphoglycerate kinase 1	-0.0159832	0.246231	0.608657
P25445	FAS	Tumor necrosis factor receptor superfamily member 6	0.0531296	0.246045	0.608985
P98194	ATP2C1	Calcium-transporting ATPase type 2C member 1	0.0243484	0.246039	0.608995
Q9ULC3	RAB23	Ras-related protein Rab-23	-0.013517	0.245486	0.609973
O00330	PDHX	Pyruvate dehydrogenase protein X component, mitochondrial	-0.0570746	0.244754	0.61127
P82921	MRPS21	28S ribosomal protein S21, mitochondrial	0.0989199	0.244651	0.611453
P41567	EIF1	Eukaryotic translation initiation factor 1	-0.0197055	0.244346	0.611994
P14927	UQCRB	Cytochrome b-c1 complex subunit 7	0.024614	0.244224	0.612212
Q8N8S7	ENAH	Protein enabled homolog	-0.0402611	0.243854	0.61287
Q8IWE2	FAM114A1	Protein NOXP20	-0.0162941	0.242695	0.614938
Q9UJZ1	STOML2	Stomatin-like protein 2, mitochondrial	0.0201091	0.242223	0.615785
Q12846	STX4	Syntaxin-4	0.0327866	0.241909	0.616348
P05186	ALPL	Alkaline phosphatase, tissue-nonspecific isozyme	-0.00512721	0.241291	0.617458
Q15631	TSN	Translin	-0.0371244	0.241211	0.617604
Q9Y241	HIGD1A	HIG1 domain family member 1A, mitochondrial	0.212351	0.240966	0.618044
P24844	MYL9	Myosin regulatory light polypeptide 9	0.164701	0.240751	0.618431
Q9NZL9	MAT2B	Methionine adenosyltransferase 2 subunit beta	0.0508627	0.240611	0.618685
P26639	TARS	Threonine--tRNA ligase, cytoplasmic	-0.0211858	0.240354	0.61915
P24043	LAMA2	Laminin subunit alpha-2	-0.0404998	0.240353	0.61915
Q13526	PIN1	Peptidyl-prolyl cis-trans isomerase NIMA-interacting 1	-0.0310377	0.24021	0.619409
Q03252	LMNB2	Lamin-B2	0.0162378	0.240186	0.619452
Q9UBI1	COMMD3	COMM domain-containing protein 3	0.0430702	0.24011	0.61959
Q16401	PSMD5	26S proteasome non-ATPase regulatory subunit 5	-0.0289019	0.239662	0.6204
Q96MG2	JSRP1	Junctional sarcoplasmic reticulum protein 1	0.0467934	0.238608	0.622314
Q8N490	PNKD	PNKD Metallo-Beta-Lactamase Domain Containing	0.0857242	0.238538	0.622442
Q9UBR2	CTSZ	Cathepsin Z	0.0492803	0.238064	0.623305
Q9UL46	PSME2	Proteasome activator complex subunit 2	-0.0287081	0.237816	0.623758
Q8NBJ7	SUMF2	Sulfatase-modifying factor 2	0.0120208	0.237764	0.623854
P22059	OSBP	Oxysterol-binding protein 1	-0.0560257	0.237696	0.623979
P63241	EIF5A	Eukaryotic translation initiation factor 5A-1	-0.0276069	0.237695	0.623981
Q8NBX0	SCCPDH	Saccharopine dehydrogenase-like oxidoreductase	0.0148664	0.237613	0.624129
Q9H1E5	TMX4	Thioredoxin-related transmembrane protein 4	-0.0494123	0.236546	0.626085
O00499	BIN1	Myc box-dependent-interacting protein 1	-0.0321951	0.236472	0.62622
Q15063	POSTN	Periostin	0.0458476	0.236389	0.626372
Q5T1M5	FKBP15	FK506-binding protein 15	-0.0795429	0.23637	0.626408
P09496	CLTA	Clathrin light chain A	0.0240244	0.235492	0.628023
Q13867	BLMH	Bleomycin hydrolase	0.0234553	0.235455	0.628091
Q8IXI1	RHOT2	Mitochondrial Rho GTPase 2	0.0229113	0.235304	0.62837
P62851	RPS25	40S ribosomal protein S25	-0.0376263	0.235144	0.628665
Q14240	EIF4A2	Eukaryotic initiation factor 4A-II	-0.00898616	0.235018	0.628899
Q9NY61	AATF	Protein AATF	0.0266033	0.234994	0.628942
Q9NZZ3	CHMP5	Charged multivesicular body protein 5	-0.0568065	0.233823	0.631113
Q9BRP8	WIBG	Partner of Y14 and mago	-0.0402218	0.233339	0.632013
P00533	EGFR	Epidermal growth factor receptor	-0.046771	0.232756	0.633099
P13804	ETFA	Electron transfer flavoprotein subunit alpha, mitochondrial	0.0110163	0.232576	0.633434
O75394	MRPL33	39S ribosomal protein L33, mitochondrial	-0.0536546	0.23249	0.633596
O75122	CLASP2	CLIP-associating protein 2	-0.0332599	0.23174	0.634999
P43490	NAMPT	Nicotinamide phosphoribosyltransferase	0.0833583	0.23159	0.63528
P56134	ATP5J2	ATP synthase subunit f, mitochondrial	0.0109138	0.231499	0.63545
Q14847	LASP1	LIM and SH3 domain protein 1	-0.0147123	0.231103	0.636194
Q9Y277	VDAC3	Voltage-dependent anion-selective channel protein 3	0.026028	0.231073	0.636251
O43772	SLC25A20	Mitochondrial carnitine/acylcarnitine carrier protein	-0.0631642	0.230942	0.636497
A0FGR8	ESYT2	Extended synaptotagmin-2	0.0188274	0.230802	0.63676
Q16527	CSRP2	Cysteine and glycine-rich protein 2	-0.04529	0.230753	0.636853
Q86WA6	BPHL	Valacyclovir hydrolase	0.0297927	0.230448	0.637428
Q9BYD1	MRPL13	39S ribosomal protein L13, mitochondrial	0.0265631	0.230297	0.637712
Q9H2U2	PPA2	Inorganic pyrophosphatase 2, mitochondrial	0.0263636	0.230259	0.637783
P49458	SRP9	Signal recognition particle 9 kDa protein	-0.119559	0.229551	0.639121
Q96IJ6	GMPPA	Mannose-1-phosphate guanyltransferase alpha	-0.0435406	0.229217	0.639752
P49753	ACOT2	Acyl-coenzyme A thioesterase 2, mitochondrial	0.138014	0.229082	0.640008
Q14315	FLNC	Filamin-C	-0.0266914	0.229063	0.640046
O60831	PRAF2	PRA1 family protein 2	-0.162258	0.228804	0.640536
P78371	CCT2	T-complex protein 1 subunit beta	-0.00774127	0.228744	0.64065
O75533	SF3B1	Splicing factor 3B subunit 1	0.0171958	0.228105	0.641866
Q9H267	VPS33B	Vacuolar protein sorting-associated protein 33B	0.0628245	0.228012	0.642043
Q9GZS3	WDR61	WD repeat-containing protein 61	-0.0497555	0.227897	0.642261
O95140	MFN2	Mitofusin-2	0.0555043	0.22778	0.642484
O14974	PPP1R12A	Protein phosphatase 1 regulatory subunit 12A	-0.00669785	0.227365	0.643277
P54709	ATP1B3	Sodium/potassium-transporting ATPase subunit beta-3	-0.00910664	0.226958	0.644054
Q8NFQ8	TOR1AIP2	Torsin-1A-interacting protein 2	0.0246502	0.226832	0.644295
O00159	MYO1C	Unconventional myosin-Ic	0.0066842	0.226129	0.645644
P14209	CD99	CD99 antigen	0.0508179	0.225759	0.646355
Q9NUJ1	ABHD10	Mycophenolic acid acyl-glucuronide esterase, mitochondrial	0.0420566	0.225521	0.646814
Q9Y570	PPME1	Protein phosphatase methylesterase 1	0.0151649	0.22548	0.646893
Q9HBL0	TNS1	Tensin-1	0.0173943	0.225098	0.647628
Q06136	KDSR	3-ketodihydrosphingosine reductase	0.0824476	0.224887	0.648036
Q9NXG2	THUMPD1	THUMP domain-containing protein 1	0.0754696	0.224592	0.648605
P19367	HK1	Hexokinase-1	0.0206781	0.223945	0.649858
P48788	TNNI2	Troponin I, fast skeletal muscle	-0.0301887	0.223795	0.650149
P23396	RPS3	40S ribosomal protein S3	-0.00964892	0.223122	0.651458
O15382	BCAT2	Branched-chain-amino-acid aminotransferase, mitochondrial	0.0567171	0.22253	0.652611
Q96FQ6	S100A16	Protein S100-A16	0.0195026	0.222299	0.653063
P52565	ARHGDIA	Rho GDP-dissociation inhibitor 1	-0.0228483	0.222298	0.653065
P53990	IST1	IST1 homolog	-0.0831621	0.222066	0.653517
Q8TDB8	SLC2A14	Solute carrier family 2, facilitated glucose transporter member 14	0.0448831	0.221681	0.654272
Q8TCS8	PNPT1	Polyribonucleotide nucleotidyltransferase 1, mitochondrial	0.0323158	0.221442	0.65474
P53634	CTSC	Dipeptidyl peptidase 1	0.0442023	0.221428	0.654768
Q12906	ILF3	Interleukin enhancer-binding factor 3	0.0116716	0.221055	0.655499
Q6PKG0	LARP1	La-related protein 1	0.055113	0.220977	0.655654
P50454	SERPINH1	Serpin H1	0.0109751	0.220859	0.655885
P30153	PPP2R1A	Serine/threonine-protein phosphatase 2A 65 kDa regulatory subunit A alpha isoform	-0.0132581	0.219962	0.657653
Q9BVK6	TMED9	Transmembrane emp24 domain-containing protein 9	0.0159177	0.219908	0.657758
Q96IZ0	PAWR	PRKC apoptosis WT1 regulator protein	0.04362	0.219813	0.657946
P10768	ESD	S-formylglutathione hydrolase	-0.0165787	0.219779	0.658014
P61353	RPL27	60S ribosomal protein L27	-0.0265322	0.219541	0.658484
Q96D15	RCN3	Reticulocalbin-3	0.0487125	0.219401	0.658762
Q9HD45	TM9SF3	Transmembrane 9 superfamily member 3	-0.0408809	0.219337	0.658888
O14656	TOR1A	Torsin-1A	0.0675716	0.219073	0.65941
Q8ND76	CCNY	Cyclin-Y	0.0210498	0.219017	0.659522
P48444	ARCN1	Coatomer subunit delta	-0.0224374	0.218626	0.660299
P82909	MRPS36	28S ribosomal protein S36, mitochondrial	-0.148879	0.218007	0.66153
Q9BRA2	TXNDC17	Thioredoxin domain-containing protein 17	-0.0351932	0.217934	0.661676
Q9NYU2	UGGT1	UDP-glucose:glycoprotein glucosyltransferase 1	0.00881746	0.217795	0.661953
P05107	ITGB2	Integrin beta-2	0.0487284	0.217497	0.662547
P22695	UQCRC2	Cytochrome b-c1 complex subunit 2, mitochondrial	0.0149087	0.216671	0.664199
P21953	BCKDHB	2-oxoisovalerate dehydrogenase subunit beta, mitochondrial	-0.0590476	0.216409	0.664725
Q8NBJ5	COLGALT1	Procollagen galactosyltransferase 1	0.0218562	0.216196	0.665153
Q9Y2S7	POLDIP2	Polymerase delta-interacting protein 2	0.0243055	0.216103	0.665339
P05388	RPLP0	60S acidic ribosomal protein P0	-0.00582771	0.21593	0.665686
P49821	NDUFV1	NADH dehydrogenase [ubiquinone] flavoprotein 1, mitochondrial	0.0170811	0.21593	0.665687
P30626	SRI	Sorcin	-0.0660125	0.215645	0.666262
P61978	HNRNPK	Heterogeneous nuclear ribonucleoprotein K	0.0135159	0.215472	0.666609
O95139	NDUFB6	NADH dehydrogenase [ubiquinone] 1 beta subcomplex subunit 6	0.050068	0.215179	0.6672
Q9UHQ4	BCAP29	B-cell receptor-associated protein 29	0.0144803	0.215151	0.667257
Q5QJE6	DNTTIP2	Deoxynucleotidyltransferase terminal-interacting protein 2	0.0279672	0.2147	0.668169
Q04917	YWHAH	14-3-3 protein eta	-0.025532	0.214653	0.668264
P10620	MGST1	Microsomal glutathione S-transferase 1	0.0293498	0.214604	0.668363
Q6P1L8	MRPL14	39S ribosomal protein L14, mitochondrial	-0.0774443	0.214546	0.668479
Q9BXY0	MAK16	Protein MAK16 homolog	0.0296238	0.214503	0.668566
Q9Y673	ALG5	Dolichyl-phosphate beta-glucosyltransferase	0.0619032	0.214127	0.669328
Q15366	PCBP2	Poly(rC)-binding protein 2	-0.0190216	0.214121	0.669341
P13535	MYH8	Myosin-8	-0.0215575	0.213973	0.669642
Q13283	G3BP1	Ras GTPase-activating protein-binding protein 1	-0.0100667	0.213883	0.669824
Q5JTJ3	COA6	Cytochrome c oxidase assembly factor 6 homolog	0.0248744	0.213723	0.670149
Q8N5G0	SMIM20	Small integral membrane protein 20	0.081048	0.21358	0.67044
Q9BSJ8	ESYT1	Extended synaptotagmin-1	0.0119406	0.21323	0.671152
Q8WU76	SCFD2	Sec1 family domain-containing protein 2	0.0566184	0.21295	0.671722
Q6PIU2	NCEH1	Neutral cholesterol ester hydrolase 1	0.0219293	0.212201	0.673252
P62070	RRAS2	Ras-related protein R-Ras2	0.0138651	0.211845	0.673982
P48729	CSNK1A1	Casein kinase I isoform alpha	0.047426	0.211774	0.674127
P11047	LAMC1	Laminin subunit gamma-1	-0.0251393	0.211592	0.674501
P61247	RPS3A	40S ribosomal protein S3a	-0.0164885	0.211464	0.674763
Q8IX01	SUGP2	SURP and G-patch domain-containing protein 2	0.0437589	0.211062	0.67559
P62820	RAB1A	Ras-related protein Rab-1A	0.00720143	0.210974	0.675771
Q96RD7	PANX1	Pannexin-1	-0.0724309	0.210973	0.675773
P00488	F13A1	Coagulation factor XIII A chain	0.0103869	0.210844	0.676039
P06756	ITGAV	Integrin alpha-V	0.016464	0.210255	0.677254
Q8NBU5	ATAD1	ATPase family AAA domain-containing protein 1	0.014249	0.210128	0.677515
Q05682	CALD1	Caldesmon	0.0240439	0.209697	0.678407
Q9Y6I3	EPN1	Epsin-1	-0.0556218	0.209637	0.678533
Q9NXV6	CDKN2AIP	CDKN2A-interacting protein	0.0544087	0.209586	0.678637
P07910	HNRNPC	Heterogeneous nuclear ribonucleoproteins C1/C2	0.0168944	0.209515	0.678784
Q9NP58	ABCB6	ATP-binding cassette sub-family B member 6, mitochondrial	0.102386	0.209074	0.6797
O75146	HIP1R	Huntingtin-interacting protein 1-related protein	-0.180727	0.208565	0.680759
Q8IZP0	ABI1	Abl interactor 1	-0.0322581	0.208202	0.681515
Q9NVJ2	ARL8B	ADP-ribosylation factor-like protein 8B	0.0368259	0.207746	0.682468
Q6P2Q9	PRPF8	Pre-mRNA-processing-splicing factor 8	0.02239	0.207449	0.683089
P60174	TPI1	Triosephosphate isomerase	-0.045965	0.20626	0.685584
Q9UH99	SUN2	SUN domain-containing protein 2	0.0538335	0.205838	0.686474
Q9UNF1	MAGED2	Melanoma-associated antigen D2	-0.0330355	0.204838	0.68859
P49757	NUMB	Protein numb homolog	-0.0598215	0.204787	0.688698
Q9NPA0	EMC7	ER membrane protein complex subunit 7	0.0267425	0.204652	0.688985
Q16850	CYP51A1	Lanosterol 14-alpha demethylase	-0.109814	0.204557	0.689187
P23588	EIF4B	Eukaryotic translation initiation factor 4B	-0.0241791	0.204468	0.689376
P22307	SCP2	Non-specific lipid-transfer protein	-0.00508262	0.203787	0.690824
Q9Y490	TLN1	Talin-1	-0.0165135	0.203771	0.690857
P35659	DEK	Protein DEK	-0.128097	0.203577	0.691271
P63244	GNB2L1	Guanine nucleotide-binding protein subunit beta-2-like 1	0.00455751	0.20355	0.69133
Q9NS69	TOMM22	Mitochondrial import receptor subunit TOM22 homolog	0.0440638	0.20354	0.691351
O43819	SCO2	Protein SCO2 homolog, mitochondrial	-0.0525785	0.203278	0.69191
P50897	PPT1	Palmitoyl-protein thioesterase 1	-0.0937937	0.203122	0.692243
P22692	IGFBP4	Insulin-like growth factor-binding protein 4	-0.121063	0.2025	0.693575
Q9HD20	ATP13A1	Manganese-transporting ATPase 13A1	0.0213684	0.202182	0.694258
Q08AF3	SLFN5	Schlafen family member 5	0.080087	0.201521	0.69568
Q9Y2W1	THRAP3	Thyroid hormone receptor-associated protein 3	0.0233382	0.200958	0.696894
Q13510	ASAH1	Acid ceramidase	0.0329729	0.200904	0.697012
Q5NDL2	EOGT	EGF domain-specific O-linked N-acetylglucosamine transferase	0.0171054	0.199906	0.699174
P56539	CAV3	Caveolin-3	-0.03233	0.199863	0.699267
Q8TEA8	DTD1	D-tyrosyl-tRNA(Tyr) deacylase 1	-0.107883	0.199656	0.699717
P41240	CSK	Tyrosine-protein kinase CSK	0.0374915	0.199656	0.699717
Q9UBY9	HSPB7	Heat shock protein beta-7	-0.0743774	0.198598	0.702024
Q01484	ANK2	Ankyrin-2	0.0368829	0.198249	0.702789
P67809	YBX1	Nuclease-sensitive element-binding protein 1	0.0186424	0.197795	0.703784
P03915	MT-ND5	NADH-ubiquinone oxidoreductase chain 5	0.0384593	0.196439	0.706772
Q16363	LAMA4	Laminin subunit alpha-4	-0.0704548	0.196199	0.707303
Q9UH62	ARMCX3	Armadillo repeat-containing X-linked protein 3	0.0217436	0.195995	0.707755
Q9UDY4	DNAJB4	DnaJ homolog subfamily B member 4	-0.0160465	0.195797	0.708193
Q15052	ARHGEF6	Rho guanine nucleotide exchange factor 6	-0.0242713	0.19523	0.709454
Q8NC51	SERBP1	Plasminogen activator inhibitor 1 RNA-binding protein	-0.0261688	0.195194	0.709535
P08237	PFKM	ATP-dependent 6-phosphofructokinase, muscle type	-0.0566093	0.195017	0.709927
Q8N5M9	JAGN1	Protein jagunal homolog 1	-0.112393	0.194973	0.710026
P62280	RPS11	40S ribosomal protein S11	-0.00831752	0.194725	0.710578
Q9UJU6	DBNL	Drebrin-like protein	-0.0173092	0.194573	0.710917
P23458	JAK1	Tyrosine-protein kinase JAK1	-0.0326949	0.194478	0.711129
Q5VTE0	EEF1A1P5	Putative elongation factor 1-alpha-like 3	-0.0105851	0.194314	0.711496
Q9Y6D5	ARFGEF2	Brefeldin A-inhibited guanine nucleotide-exchange protein 2	-0.120929	0.194086	0.712006
P12268	IMPDH2	Inosine-5-monophosphate dehydrogenase 2	-0.0610027	0.193442	0.71345
Q16512	PKN1	Serine/threonine-protein kinase N1	0.116156	0.193198	0.713998
P49591	SARS	Serine--tRNA ligase, cytoplasmic	-0.0132404	0.193196	0.714001
P27144	AK4	Adenylate kinase 4, mitochondrial	0.0280157	0.193192	0.71401
P30837	ALDH1B1	Aldehyde dehydrogenase X, mitochondrial	0.0202947	0.193048	0.714336
Q9H6X2	ANTXR1	Anthrax toxin receptor 1	0.0189847	0.192921	0.71462
Q86SF2	GALNT7	N-acetylgalactosaminyltransferase 7	-0.0711964	0.191808	0.717133
Q96GQ7	DDX27	Probable ATP-dependent RNA helicase DDX27	-0.043564	0.191763	0.717236
O75487	GPC4	Glypican-4	0.0795309	0.191745	0.717276
P63027	VAMP2	Vesicle-associated membrane protein 2	0.187545	0.190863	0.719277
Q08397	LOXL1	Lysyl oxidase homolog 1	-0.0562013	0.190859	0.719288
P60709	ACTB	Actin, cytoplasmic 1	0.0103201	0.190753	0.719528
Q08043	ACTN3	Alpha-actinin-3	-0.153552	0.190624	0.719821
P30520	ADSS	Adenylosuccinate synthetase isozyme 2	0.107674	0.19048	0.72015
O75431	MTX2	Metaxin-2	0.0470896	0.189382	0.722661
O75477	ERLIN1	Erlin-1	0.0237879	0.188956	0.723639
P62736	ACTA2	Actin, aortic smooth muscle	0.0595959	0.18889	0.723791
Q5GLZ8	HERC4	Probable E3 ubiquitin-protein ligase HERC4	-0.0756746	0.188638	0.724371
Q13838	DDX39B	Spliceosome RNA helicase DDX39B	0.0375191	0.188087	0.725642
Q99729	HNRNPAB	Heterogeneous nuclear ribonucleoprotein A/B	0.0247809	0.187592	0.726786
Q9HB90	RRAGC	Ras-related GTP-binding protein C	0.0657541	0.187587	0.726798
P25398	RPS12	40S ribosomal protein S12	-0.0183056	0.18753	0.726929
Q9H0U3	MAGT1	Magnesium transporter protein 1	0.0233211	0.187475	0.727056
Q9UI10	EIF2B4	Translation initiation factor eIF-2B subunit delta	-0.0591168	0.187394	0.727244
Q96CV9	OPTN	Optineurin	-0.0477521	0.18722	0.727647
Q96M27	PRRC1	Protein PRRC1	-0.0309916	0.186451	0.729434
Q9H3P7	ACBD3	Golgi resident protein GCP60	-0.031769	0.186392	0.729572
Q16666	IFI16	Gamma-interferon-inducible protein 16	0.0250592	0.186233	0.729943
O43674	NDUFB5	NADH dehydrogenase [ubiquinone] 1 beta subcomplex subunit 5, mitochondrial	0.0136453	0.186004	0.730478
Q9UKD2	MRTO4	mRNA turnover protein 4 homolog	-0.064864	0.185817	0.730914
O60662	KLHL41	Kelch-like protein 41	-0.0160706	0.18576	0.731048
P23284	PPIB	Peptidyl-prolyl cis-trans isomerase B	-0.0282747	0.185448	0.731778
Q9NWM8	FKBP14	Peptidyl-prolyl cis-trans isomerase FKBP14	-0.046479	0.18486	0.733158
P51571	SSR4	Translocon-associated protein subunit delta	0.0251287	0.184459	0.7341
O75396	SEC22B	Vesicle-trafficking protein SEC22b	0.0149499	0.184432	0.734164
Q96A26	FAM162A	Protein FAM162A	0.0210438	0.184375	0.734299
P04844	RPN2	Dolichyl-diphosphooligosaccharide--protein glycosyltransferase subunit 2	0.0231308	0.183843	0.735553
P61764	STXBP1	Syntaxin-binding protein 1	0.0153718	0.183603	0.736121
Q92890	UFD1L	Ubiquitin fusion degradation protein 1 homolog	-0.0831394	0.183591	0.736149
Q7Z2Y8	GVINP1	Interferon-induced very large GTPase 1	0.192709	0.18358	0.736174
P53367	ARFIP1	Arfaptin-1	-0.0583135	0.183406	0.736587
Q7Z478	DHX29	ATP-dependent RNA helicase DHX29	0.023304	0.183271	0.736907
Q15904	ATP6AP1	V-type proton ATPase subunit S1	0.0909731	0.182659	0.73836
Q15629	TRAM1	Translocating chain-associated membrane protein 1	0.0292197	0.182614	0.738467
Q15643	TRIP11	Thyroid receptor-interacting protein 11	0.0335951	0.18259	0.738523
Q9Y6M7	SLC4A7	Sodium bicarbonate cotransporter 3	0.0701283	0.182516	0.738698
Q8NF91	SYNE1	Nesprin-1	0.0144347	0.182397	0.738983
Q96TC7	RMDN3	Regulator of microtubule dynamics protein 3	0.100689	0.182022	0.739877
Q8IV08	PLD3	Phospholipase D3	-0.13521	0.18194	0.740072
Q6RW13	AGTRAP	Type-1 angiotensin II receptor-associated protein	-0.120434	0.181788	0.740435
Q9UBV8	PEF1	Peflin	0.134109	0.18159	0.740908
P27695	APEX1	DNA-(apurinic or apyrimidinic site) lyase	0.0233048	0.181034	0.74224
Q12904	AIMP1	Aminoacyl tRNA synthase complex-interacting multifunctional protein 1	-0.0287237	0.181	0.742321
O95202	LETM1	LETM1 and EF-hand domain-containing protein 1, mitochondrial	0.00813144	0.180813	0.742771
Q86Y39	NDUFA11	NADH dehydrogenase [ubiquinone] 1 alpha subcomplex subunit 11	0.0311078	0.180781	0.742846
Q15435	PPP1R7	Protein phosphatase 1 regulatory subunit 7	-0.0654222	0.180748	0.742927
P50750	CDK9	Cyclin-dependent kinase 9	0.0185239	0.180415	0.743728
Q8TAE8	GADD45GIP1	Growth arrest and DNA damage-inducible proteins-interacting protein 1	0.103855	0.180148	0.744369
Q7L014	DDX46	Probable ATP-dependent RNA helicase DDX46	-0.0721424	0.180116	0.744448
P35658	NUP214	Nuclear pore complex protein Nup214	-0.036567	0.179919	0.744922
[truncated: 727 more rows]
